# Supplementary material for: fastGxE: Powering genome-wide detection of genotype-environment interactions in biobank studies
Source: Research Square preprint supplement (doi:10.21203/rs.3.rs-5952773/v1), 2025-03-20
Supplement: Supplementary file 1 [file 73199834897091a39f19d08d.docx]

**1 Supplementary Note**

**1.1 fastGxE**

**1.1.1 Model details**

Our model is described in detail in the main text. For clarity and convenience, we first restate it here. Let denote an -vector of phenotypic measurements, an by matrix of environmental factors with the column vector () representing the th environmental factor, and an by genotype matrix with the column vector () representing the genotypes for th SNP. We examine one SNP at a time and denote as an -vector of genotypes for the SNP of focus. We standardize the phenotypic vector, each genotype vector, and each environment factor vector to have a mean of zero and a standard deviation of one. For the SNP of focus, we consider the following model:

where is the genetic main effect size for the SNP of focus; is the main effect size of th environmental factor; is the interaction effect between the SNP of focus and th environmental factor; is the genetic main effect size of th SNP; is the interaction effect between the th SNP and th environmental factor; denotes the Hadamard product, representing element-wise multiplication between two vectors; and is an -vector of residual errors with each element following a normal distribution with mean zero and error variance .

We define as the genome-wide polygenetic effects and as the genome-wide polygenetic GxE effects. The model in equation (1) can be rewritten as

The variance for can be derived as

where is the genetic relationship matrix (GRM) calculated using genome-wide SNPs in the form of ; and is the polygenetic variance. The variance for can be derived as

where is the covariance measuring the similarity among individuals in terms of their environmental exposures; is theGxE relationship matrix in the form of ; and is the polygenetic GxE variance. Therefore, the random effects for model in equation (2) follow a multivariate normal distribution in the following forms:

**1.1.2 Scalable variance parameters estimation**

For the model in equation (2), we first estimate the variance parameters under the null model where for all . To facilitate computation, we further set in the null model following previous studies, as the genetic main effect size for the SNP of focus contributes minimally to the estimation of variance parameters(Kang, et al., 2010). Under the null, the restricted loglikelihood function to estimate variance parameters is formulated as(Zhou and Stephens, 2012)

where , , . In this study, we used the efficient iterative algorithm which combines expectation-maximization and average information to maximize restricted loglikelihood function (Ning, et al., 2019). The first partial derivatives for are

The average information (AI) matrix is

With the first partial derivatives and AI matrix, we use the following iterative equation to update the variance parameters

where denotes the variance parameters at the previous iteration *t* while represents that at the current iteration *t*+1.

The update equation for EM algorithm(Jensen, et al., 1997; Ning, et al., 2019) is

Here, the expectation-maximization (EM) information matrix is a diagonal matrix with the following elements

To ensure rapid convergence of the variance parameters, we built a weighted information matrix as

With the weighted information matrix, the iterative equation to update the variance parameters is

For each iteration, we increase from 0 to 1 with a step size of 0.01 until all the updated variances are positive.

The above algorithm requires an iterative evaluation of the phenotypic covariance matrix () in equation (4). However, for large scale data with hundreds of thousands of samples, it is difficult to obtain such inverse. Therefore, we construct a sparse block diagonal genetic relationship matrix, following Gogarten, et al. (2019) and Li, et al. (2023), to facilitate computation. Specifically, we organize samples into subgroups such that any pair with an estimated relatedness greater than 0.05 belongs to the same subgroup. We retained all pairwise relatedness estimates within each subgroup even if they fall below 0.05 and we set pairwise relatedness estimates between subgroups to zero. This results in a sparse block-diagonal genetic relationship matrix. In particular, given *s* subgroups, has the following form:

For the element-wise product between and , because it is time and memory inefficient to calculate and store all elements of , we only calculate the corresponding elements of subgroups in . Specifically, we first define the matrix as the environment covariate matrix for the th subgroup, where is the subgroup size. We then obtain

Here,

Because and are sparse block diagonal matrices in the same format, is also a sparse block diagonal matrix, with the th subgroup expressed being

This way, we can obtain the inverse of by calculating the inverse of each sub-block separately, which is computationally efficient. With , and , we leverage efficient sparse block matrix multiplication to calculate the restricted log-likelihood function, its first partial derivatives, and the weighted information matrix.

**1.1.3 Fast and scalable multivariate GxE test**

Here, we describe the technical details for the GxE tests in fastGxE. For the SNP of focus, we first consider a set of distinct sparse modeling assumptions where only one is non-zero and perform single environment GxE test. Under each such modeling assumption, the null hypothesis becomes equivalent to the null hypothesis for the specific . Consequently, for each modeling assumption, we carry out a score test and compute the corresponding *p*-value. The score test is formulated as

where matrix is calculated in the null model without interaction effects as following

Besides these sparse assumptions, we also consider a polygenic modeling assumption (Moore, et al., 2019) that each follows a normal distribution . Under such modeling assumption, the null hypothesis becomes equivalent to the null hypothesis . Consequently, we carry out a variance component test to obtain the -value under such polygenic assumption. The variance component test is formulated as

It has been shown that follows a mixture of chi-square distributions:

Here, is the eigenvalue of , which can be computed as

where is a matrix. Following the study of Wu, et al. (2016), the *p* values are computed using Davies method (Davies, 1980) if it converges; and switch to the saddle-point approximation method (Liu, et al., 2009) when it does not.

We employ multiple computational techniques to optimize the computation of genome-wide multivariate GxE test. Firstly, we use a sparse GRM to enhance computational efficiency while preserving accuracy, as described in the previous section (Gogarten, et al., 2019; Jiang, et al., 2019; Li, et al., 2023). Secondly, for SNPs with non-significant genotype main effects (main effect *p*-value > 1.0e-3), we removed their main effect terms from the interaction test model. As a result, the matrix is simplified as for genome-wide SNPs. This way, and can be precalculated and applied to genome-wide interaction tests. For each SNP analyzed, the calculation of and only involves element-wise and dot product of vectors, resulting in a time complexity of . Thirdly, to boost the calculation speed of and , we implement an improved version of the GRAMMAR-GAMMA approximation (Svishcheva, et al., 2012). Specifically, we randomly select a certain number of SNPs (for example, 1,000) and calculate the GAMMA factor () and GAMMA matrix () as

In this study, and is estimated as the average of random SNPs

Afterwards, for genome-wide interaction tests, we approximate and as

which again has a time complexity of .

**1.2 Identifying the environmental factors that drive the observed GxE interaction**

Here, we describe in detail our extension of SuSiE, which we refer to as mixed model SuSiE (mmSuSiE) for identifying the environmental factors that drive the observed GxE interaction effects, while controlling for both polygenetic and polygenetic GxE effects. To start, we first introduce two building blocks for mmSuSiE: the Bayesian mixed model regression with a single variable of interest in section 1.2.1. and the “mixed model single-effect regression” (mmSER) in section 1.2.2.

**1.2.1 Bayesian mixed model regression with a single variable of interest**

We first consider the Bayesian mixed model regression with a single variable of interest. We denote the variable of interest as an *n*-vector of . Our goal is to perform inference on its effect size *b*, which is a scalar, while controlling for both polygenetic effects and polygenetic GxE effects . We consider the following Bayesian mixed model regression:

Given  and , the posterior computation for this model can be conveniently written in terms of the generalized least-squares estimate

The posterior distribution for is given by

Afterwards, we have

We can compute the Bayes Factor (BF) for comparing this model with the null model where as

The derivative of BF with respect to is

**1.2.2 Mixed model single effect regression (mmSER)**

mmSER contains multiple variables, but only one variable has a non-zero effect. It is defined as follows:

Here, is an matrix containing individuals of explanatory variables, whose columns have been centered to have mean 0 to avoid the need for an intercept term; is a scalar representing the ‘single effect’; is a *q*-vector of indicator variables, indicating which of the variables has the non-zero effect; represents a multinomial distribution with a single trial and probability vector , specifying the probabilities for each variable having the non-zero effect.

Given and , the posterior distribution on is

Here, is a vector of posterior inclusion probabilities (PIPs), which can be expressed in terms of BFs from a Bayesian mixed model with a single variable of interest:

where and are the posterior mean and variance in equations (33) and (32):

The first and second moments of this posterior distribution are

We use an empirical Bayes approach to estimate the hyperparameters and . The likelihood is

where denotes the distribution of under the null model that ; is given in equation (34). The estimation of can be obtained by maximizing the likelihood over by keeping fixed. With (35), the derivative of with respect to is

With the first derivative, we perform one-dimension optimization to obtain the estimate for using the limited memory Broyden-Fletcher-Goldfarb-Shanno with boundaries (L-BFGS-B).

**1.2.3** Mixed model sum of single effects (**mmSuSiE)**

mmSuSiE contains multiple variables, with one or multiple variables exhibiting non-zero effects. mmSuSiE can be directly applied to our GxE context to identify the specific environment factors that contribute to the GxE interaction signals, while controlling for both the polygenetic and polygenetic GxE effects. To do so, we first introduce a set of multiple single-effect vectors ( for *l* = 1, …, *L*) and the overall effect vector as the sum of these single effects. The mmSuSiE model can be written in the following form:

|  |  |
| --- | --- |

Here,

For generality, we have allowed the variance of each effect, , to vary among the components, *l* = 1, …, *L*. For simplicity, we initially assume that and are given. A key observation in (35) is that, given , …, , estimating involves simply fitting a mmSER in (31), which is tractable. This suggests an iterative approach to fit this model: at each iteration, we can use the mmSER to estimate given current estimates of , for , resulting in iterative Bayesian stepwise selection. Here, we develop a variational approximation algorithm for scalable inference on the hyperparameters and. Specifically, we aim to find an approximation to the posterior distribution by minimizing the Kullback-Leibler (KL) divergence from to , written as , subject to constraints on that make the problem tractable. While itself is difficult to compute, it can be formulated in terms of an easier-to-compute function , known as the ‘evidence lower bound (ELBO):

Because does not depend on , minimizing over is equivalent to maximizing . The approximate posterior is assumed to factorize as

with assumed independent *a posterior*.

We aim to minimize the KL divergence between the approximate posterior above and the actual posterior. Minimizing the KL divergence is equivalent to maximizing the evidence of lower bound (ELBO) defined below:

|  |  |
| --- | --- |

Here,

Therefore, we have

For the second term in (50), we have

Overall, our variational algorithm for fitting mmSuSiE can be summarized in the following table.

| **Iterative Bayesian stepwise selection Algorithm for mmSuSiE** |
| --- |
| **Require input:** Data,.  **Require input:** Number of effects, ; initial estimates of hypermeters , .  **Require input:** Initial estimate of the posterior mean of , for *l* = 1, …, *L*.  1: **repeat**  2: . ⇒ Compute expected residuals.  3: **for** *l* in 1, …, *L* do  4: ⇒ Disregard the *l*th single effect in residuals.  5: is updated by maximizing  6: is updated by fitting mmSER  7:  8: ⇒ Update expected residuals.  9: is updated by maximizing ELBO.  10: **until** the change of ELBO between consecutive iterations is below 0.001.  **return** . |

**1.3 Environment covariates**

Environment covariates analyzed in the study include: age, Townsend deprivation index (TDI), 6 physical activity variables (Frequency of stair climbing in last 4 weeks, Number of days/week of moderate physical activity 10+ minutes, Number of days/week of vigorous physical activity 10+ minutes, Number of days/week walked 10+ minutes, Time spent driving, Usual walking pace), 4 electronic device usage variables (Time spent using computer, Time spent watching television, Length of mobile phone use, Plays computer games), 6 sleep related variables (Sleep duration, squared deviations from the mean sleep duration, Getting up in morning, Nap during day, Sleeplessness/insomnia, Daytime dozing/sleeping), current tobacco smoking, 11 ordinal dietary intake variables (Oily fish intake, Non-oily fish intake, Processed meat intake, Poultry intake, Beef intake, Lamb/mutton intake, Pork intake, Cheese intake, Salt added to food, Hot drink temperature, Variation in diet), 9 continuous dietary intake variables (Cooked vegetable intake, Salad/raw vegetable intake, Fresh fruit intake, Dried fruit intake, Bread intake, Cereal intake, Tea intake, Coffee intake, Water intake), alcohol intake frequency, 2 social support variables (Frequency of friend/family visits, Able to confide). For Time spent driving, Time spent using a computer, and Time spent watching television, we excluded values above the 99th percentile and set values below 0.5 hours to 0.5. For Sleep duration, we removed the top and bottom 1% of values and calculated squared deviations from the mean sleep duration for each individual to derive the environmental variable Squared sleep duration residuals. For nine continuous dietary intake variables, we excluded values exceeding the 99th percentile and set values below 0.5 hours to 0.5.

**2 Supplementary Figures**

**
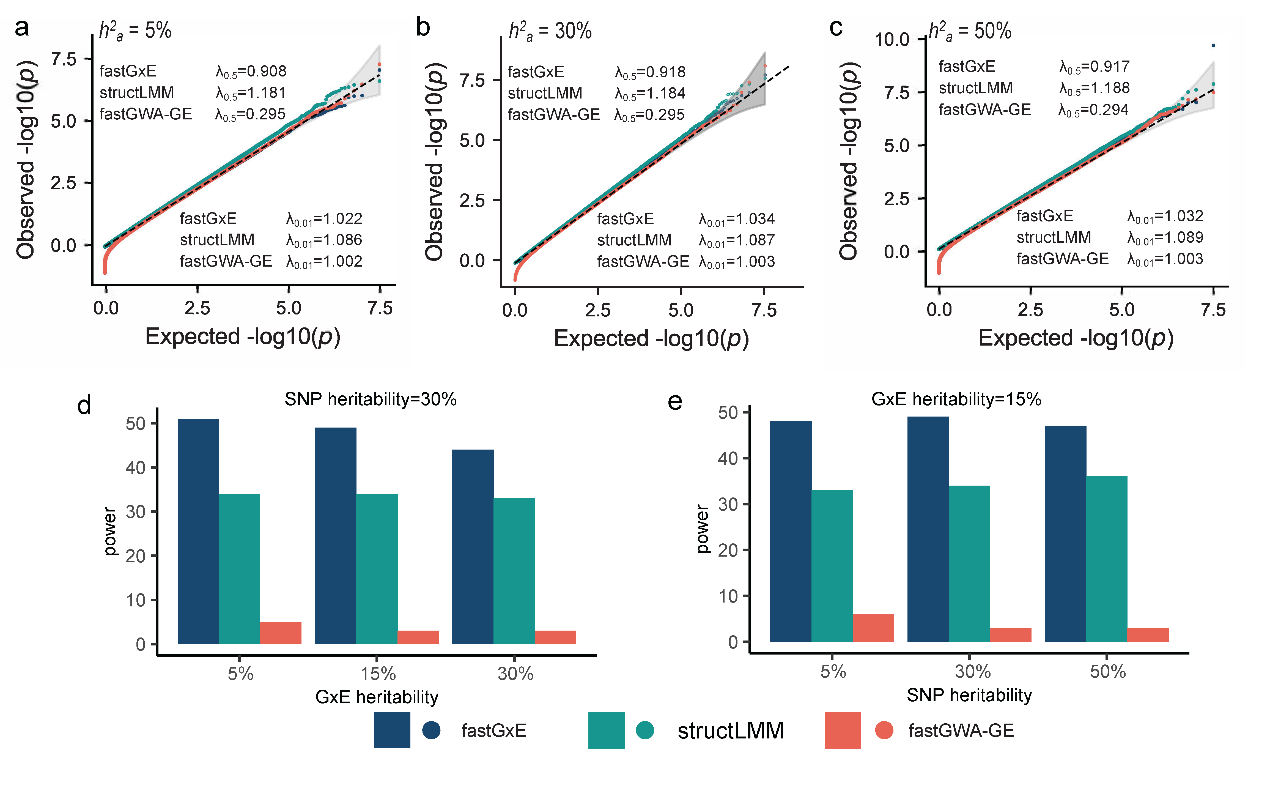
**

**Supplementary Figure 1. Simulation comparisons of fastGxE, structLMM, and fastGWA-GE.** (a-c) Quantile-quantile plots of -log10 *p*-values from SNPs on even-numbered chromosomes without GxE effects, under SNP heritability levels of 5% (a), 30% (b), and 50% (c); Power comparisons under varying baseline settings with different levels of GxE heritability (d), and SNP heritability (e).

**
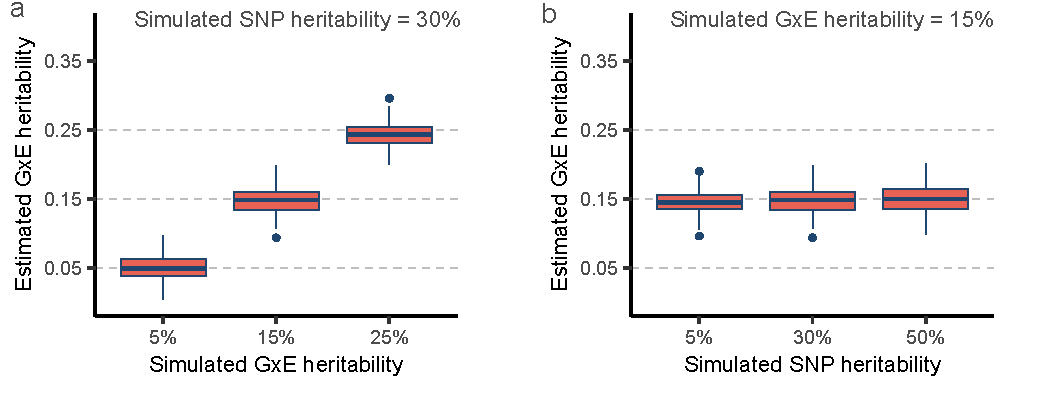
**

**Supplementary Figure 2. Estimated GxE heritability using fastGxE versus truth in simulations under varying baseline settings with different levels of GxE heritability (a) and SNP heritability (b).** Boxplots represent the distribution of estimated GxE heritability values over 100 simulation replicates.

**
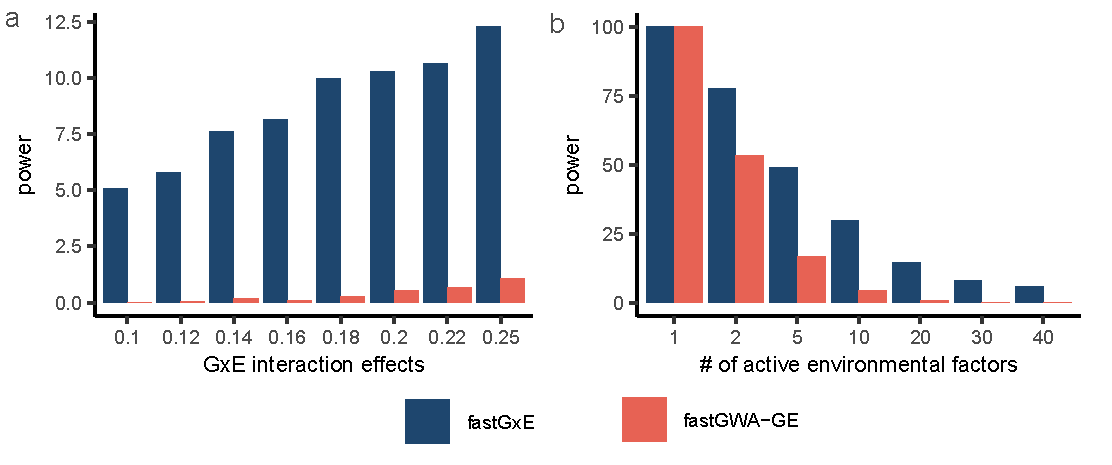
**

**Supplementary Figure 3. Power comparison between fastGxE and fastGWA-GE in identifying the specific environmental factors driving the detected GxE associations.** Power comparisons were conducted at varying levels of GxE interaction effects (a), or different numbers of active interacting environmental factors (b).

**
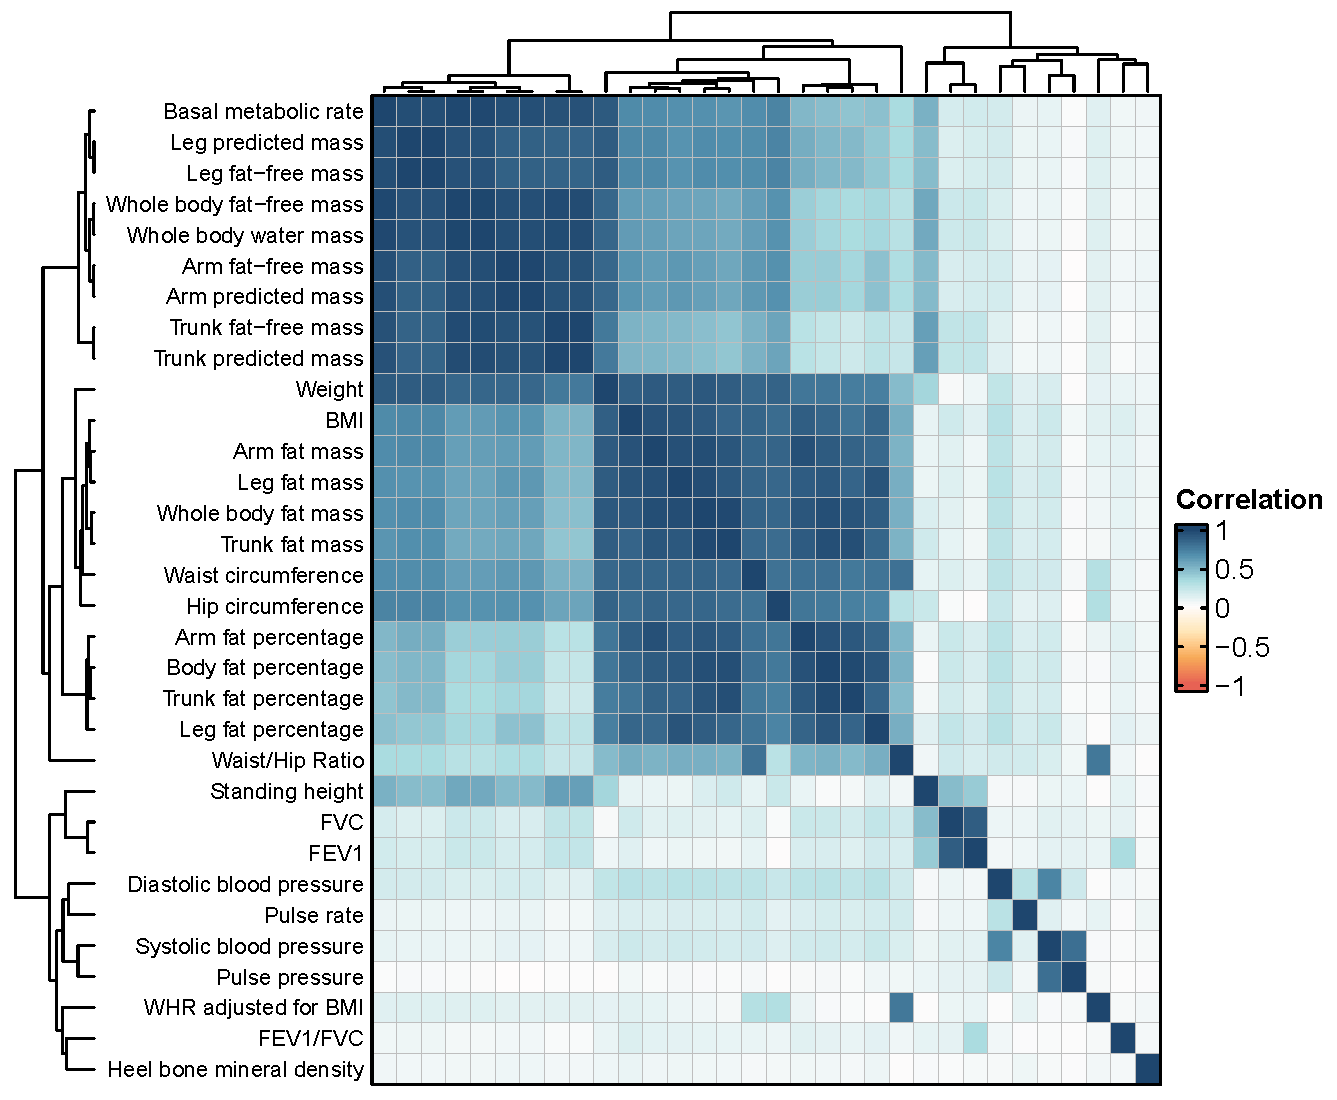
**

**Supplementary Figure 4. Heatmap shows pair-wise Pearson correlation among 32 physical traits used for GxE analyses in UKB.** Traits are clustered hierarchically based on their similarity, with blue indicating strong positive correlations and red indicating strong negative correlations.

**
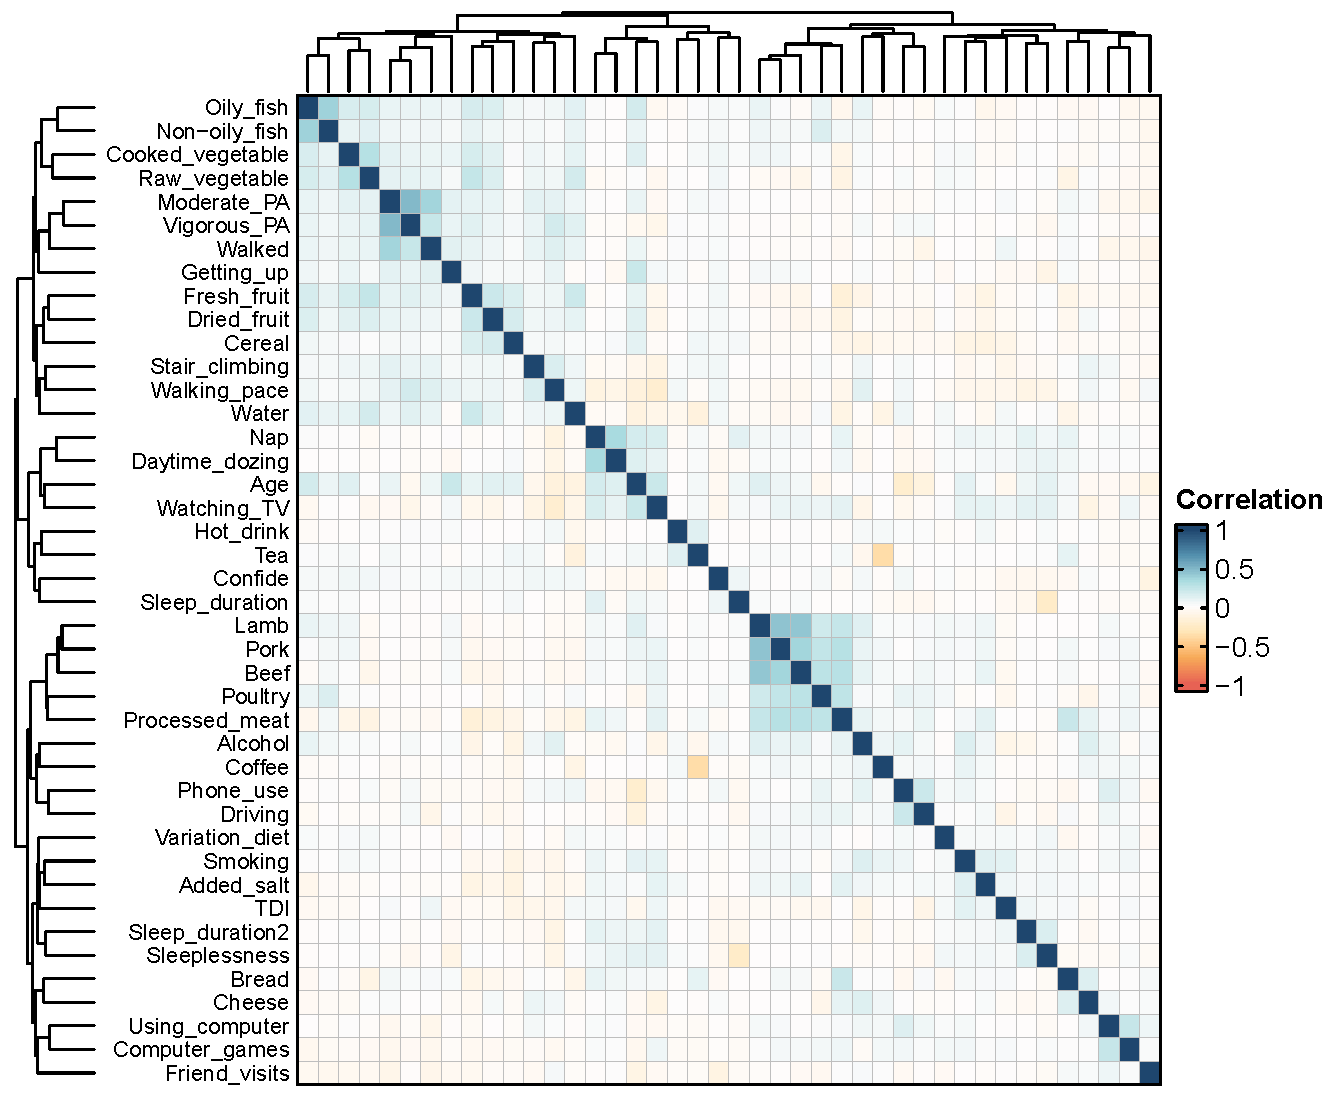
**

**Supplementary Figure 5. Heatmaps shows pair-wise Pearson correlation among 42 environmental factors used for GxE analyses in UKB.** The environmental factors include age, Townsend deprivation index, 6 physical activity variables, 4 electronic device usage variables, 6 sleep related variables, smoking status, 11 ordinal dietary intake variables, 9 continuous dietary intake variables, alcohol intake frequency, and 2 social support variables. Environmental factors are clustered hierarchically based on their similarity, with blue indicating strong positive correlations and red indicating strong negative correlations.

**
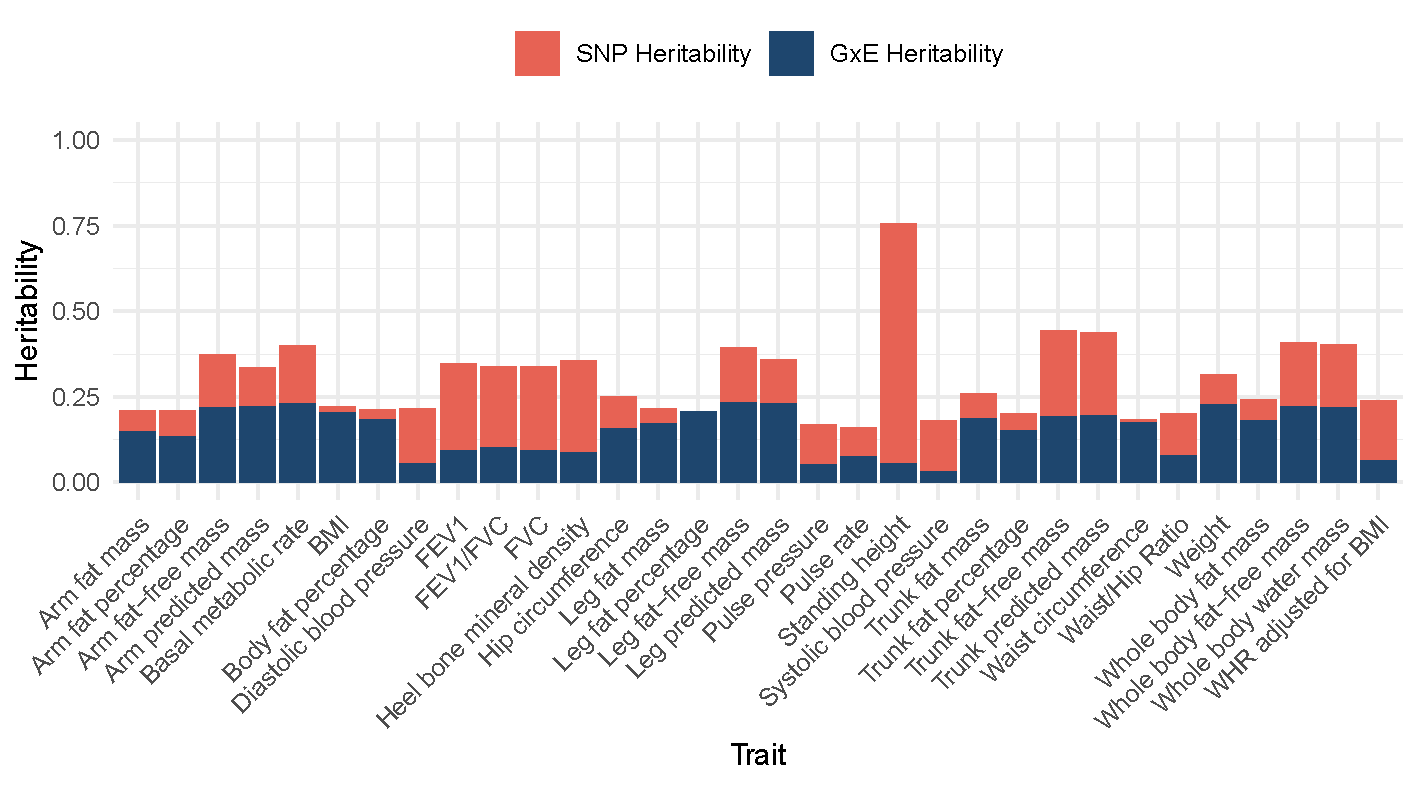
**

**Supplementary Figure 6. Estimate of SNP heritability and GxE heritability by fastGxE for 32 physical traits in UKB.**

**
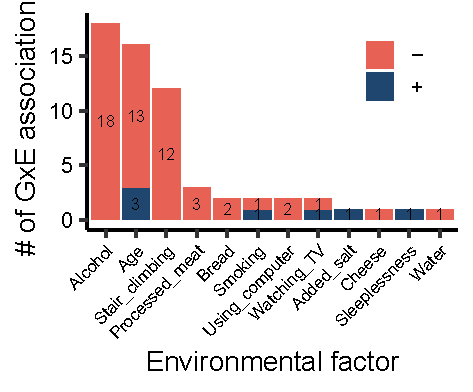
**

**Supplementary Figure 7. Bar plot showing the number of GxE associations involving a given environmental factor across 32 physical traits in UKB.** Dark red bars represent GxE associations with GxE effects opposite to the SNP main effects, while blue bars represent associations with consistent effects.

**
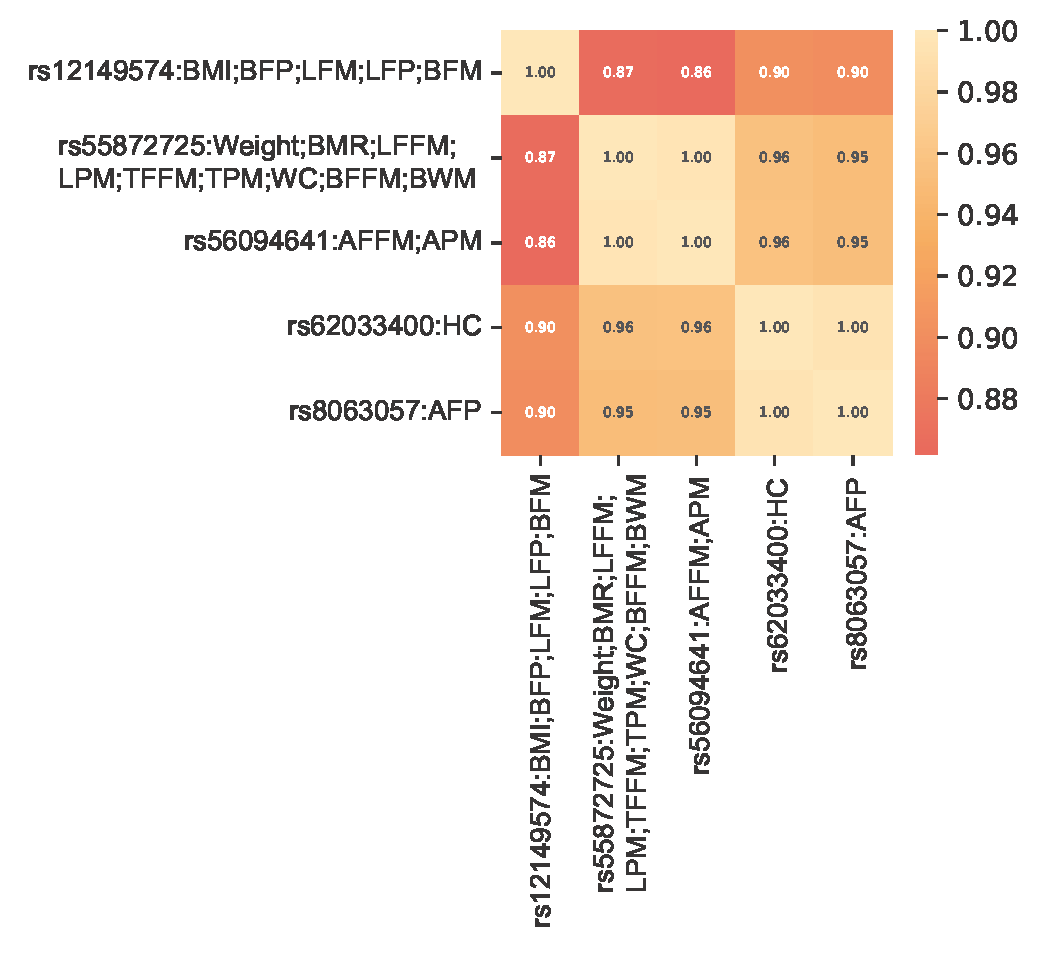
**

**Supplementary Figure 8. Heatmap of LD *r*2 values for the lead SNPs associated with different traits in the *FTO* region.**


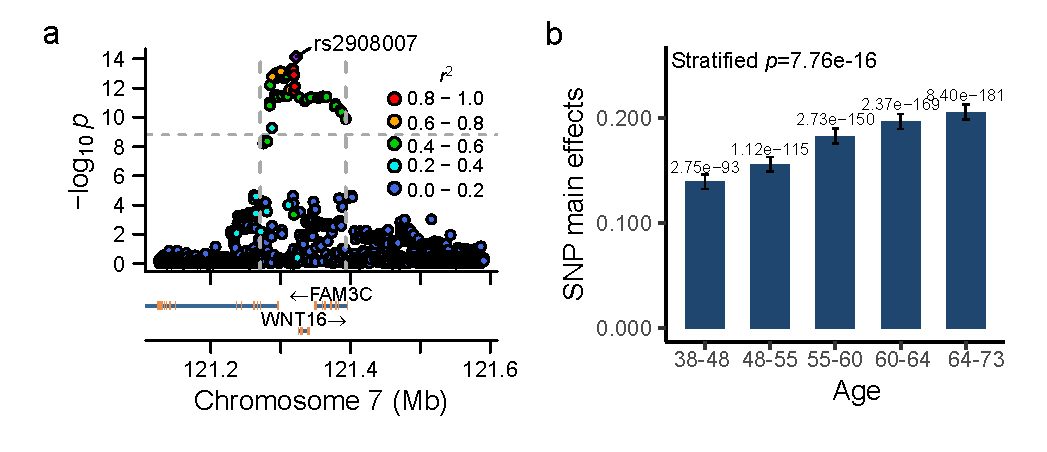


**Supplementary Figure 9. *WNT16* region (7:121,270,692-121,393,067), which contains GxE signals associated with heel bone mineral density (BMD).** (a) Locus zoom plot showing -log10 GxE *p*-values for SNPs in the *WNT16* region associated with BMD; (b) Estimated SNP main effects on BMD with standard errors, along with corresponding *p*-values, in different age quintiles for the lead GxE SNP (rs2908007).

**
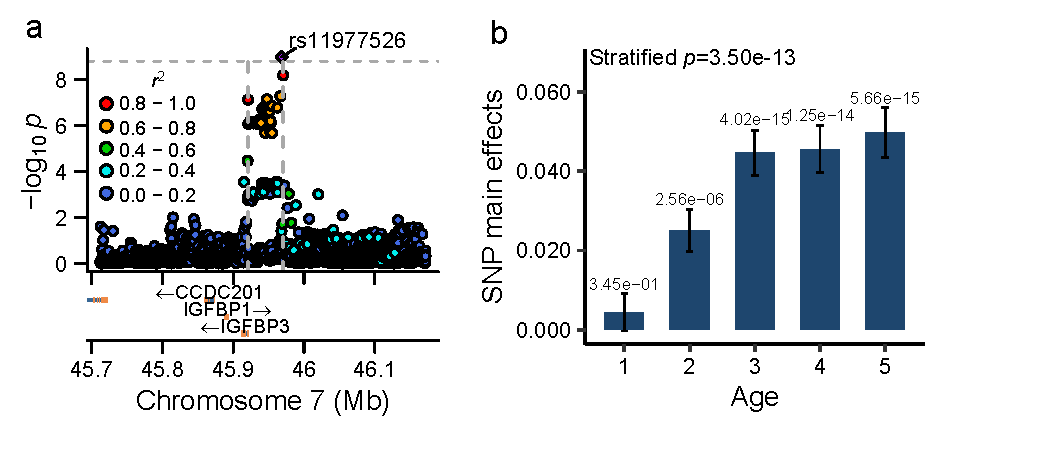
**

**Supplementary Figure 10. *IGFBP3* region (7:45,921,046-45,970,501), which contains GxE signals associated with pulse pressure (PP).** (a) Locus zoom plot showing -log10 GxE *p*-values for SNPs in the *IGFBP3* region associated with PP; (b) Estimated SNP main effects on PP with standard errors, along with corresponding *p*-values, in different age quintiles for the lead GxE SNP (rs11977526).

**
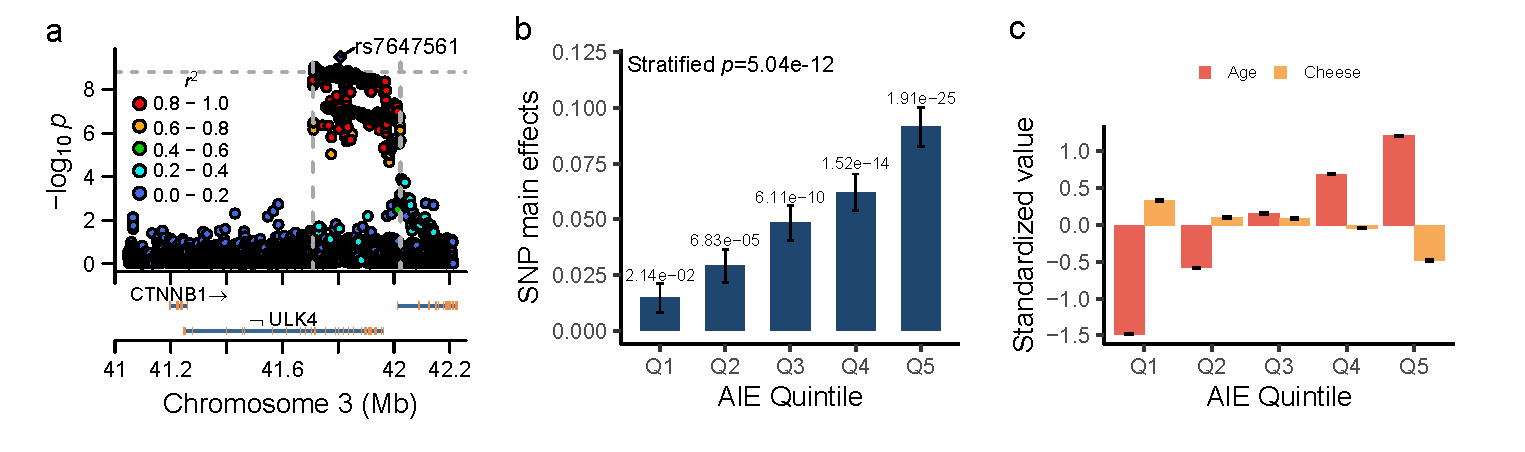
**

**Supplementary Figure 11. *ULK4* region (3:41,708,768-42,023,513), which contains GxE signals associated with pulse pressure (PP).** (a) Locus zoom plot showing -log10 GxE *p*-values for SNPs in the *ULK4* region associated with PP; (b) Estimated SNP main effects on PP with standard errors, along with corresponding *p*-values, in different quintiles of aggregated interacting environment (AIE) scores for the lead GxE SNP (rs7647561); (c) Standardized values of identified interacting environmental factors in different quintiles of AIE scores.


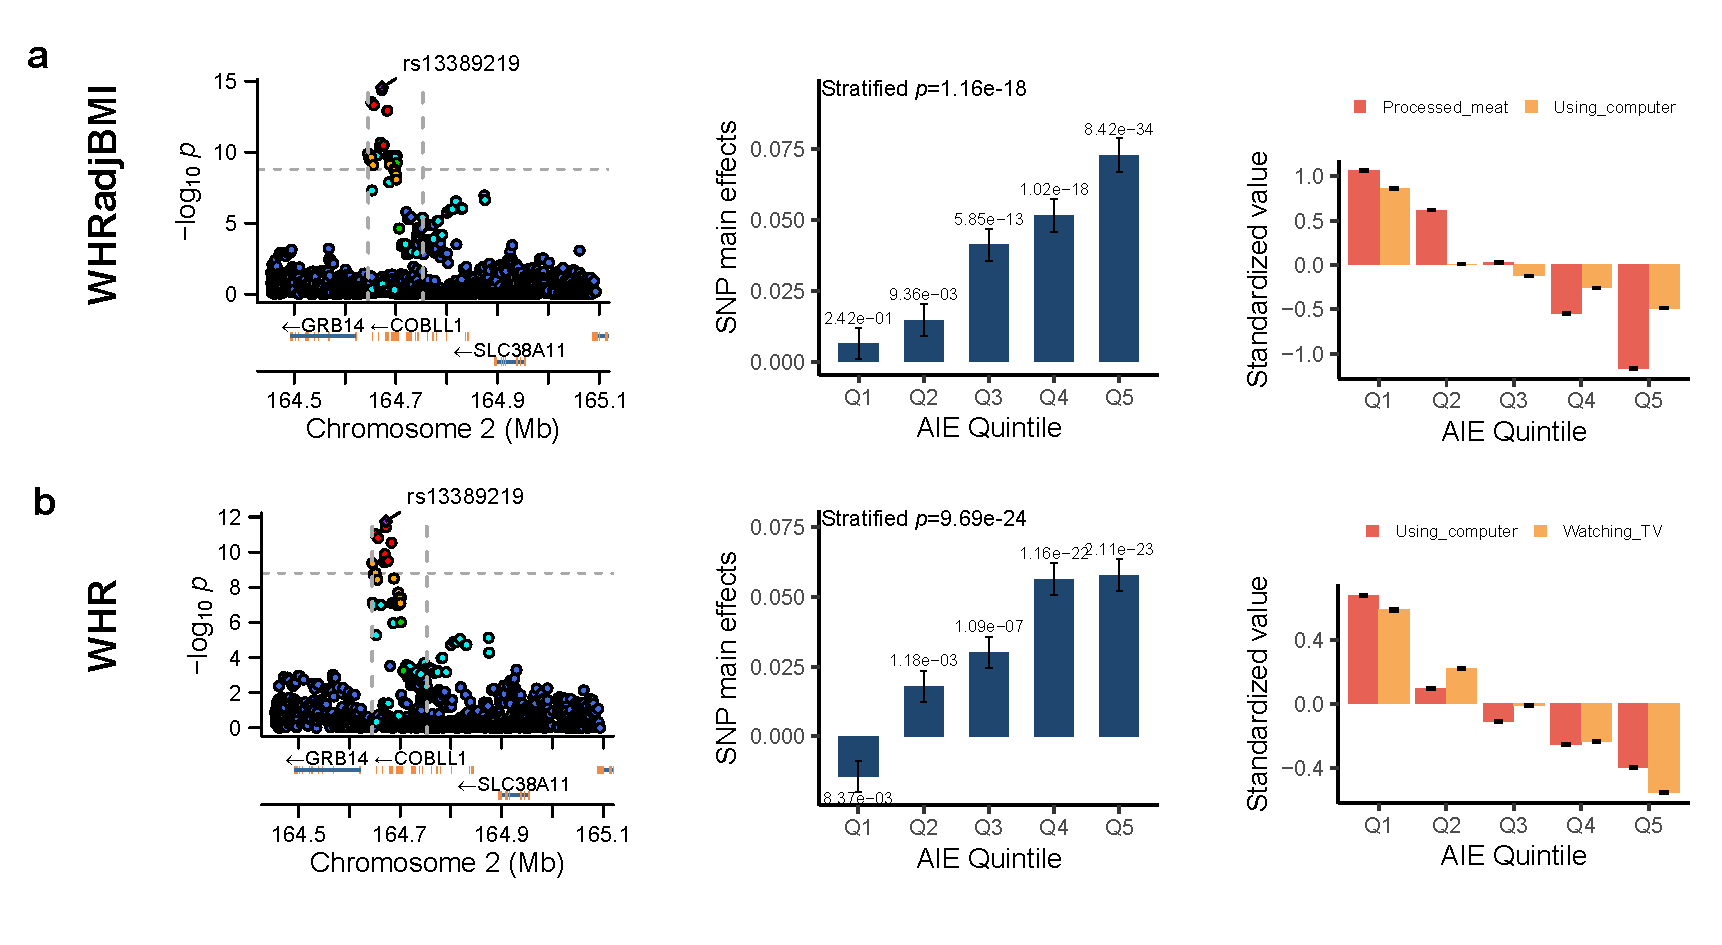


**Supplementary Figure 12. *COBLL1* region (2:165,501,849-165,580,775), which contains GxE signals associated with WHRadjBMI (a) and WHR (b).** Locus zoom plots showing -log10 GxE *p*-values for SNPs in the *COBLL1* region associated with WHRadjBMI and WHR (left panel); Estimated SNP main effects on WHRadjBMI and WHR with standard errors, along with corresponding *p*-values, in different quintiles of aggregated interacting environment (AIE) scores for the lead GxE SNP (rs13389219) (middle panel); Standardized values of identified interacting environmental factors in different quintiles of AIE scores (right panel).

**
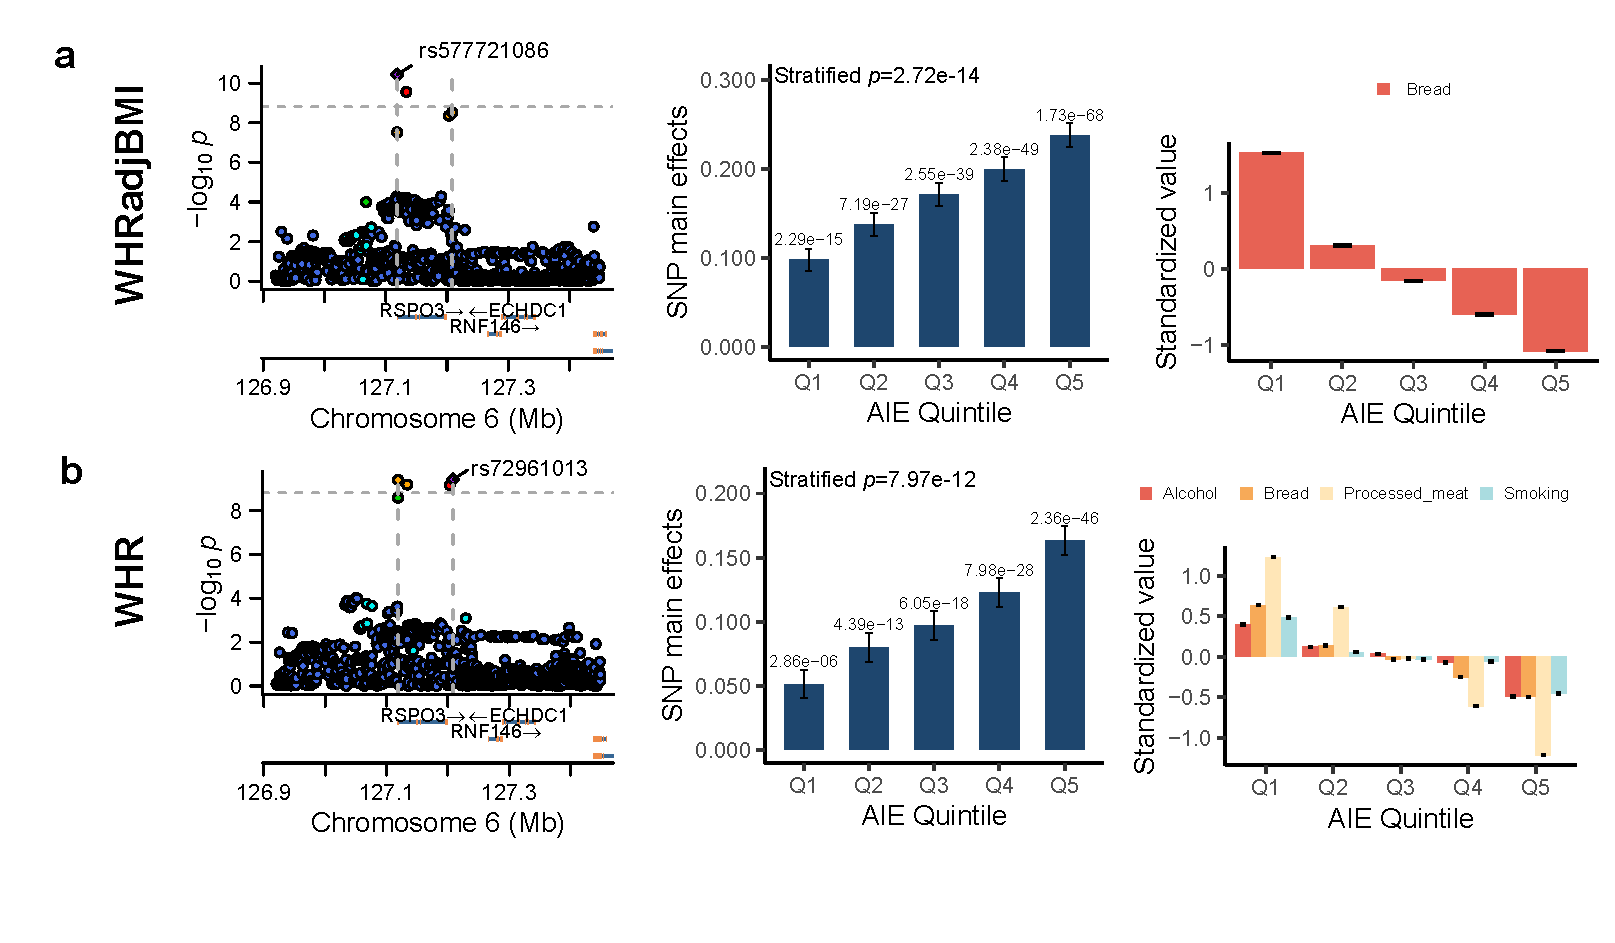
**

**Supplementary Figure 13. *RSPO3* region (6:127,118,752-127,208,635), which contains GxE signals associated with WHRadjBMI (a) and WHR (b).** Locus zoom plots showing -log10 GxE *p*-values for SNPs in the *RSPO3* region associated with WHRadjBMI and WHR (left panel); Estimated SNP main effects on WHRadjBMI and WHR with standard errors, along with corresponding *p*-values, in different quintiles of aggregated interacting environment (AIE) scores for the lead GxE SNPs (rs577721086 and rs72961013) (middle panel); Standardized values of identified interacting environmental factors in different quintiles of AIE scores (right panel).

**
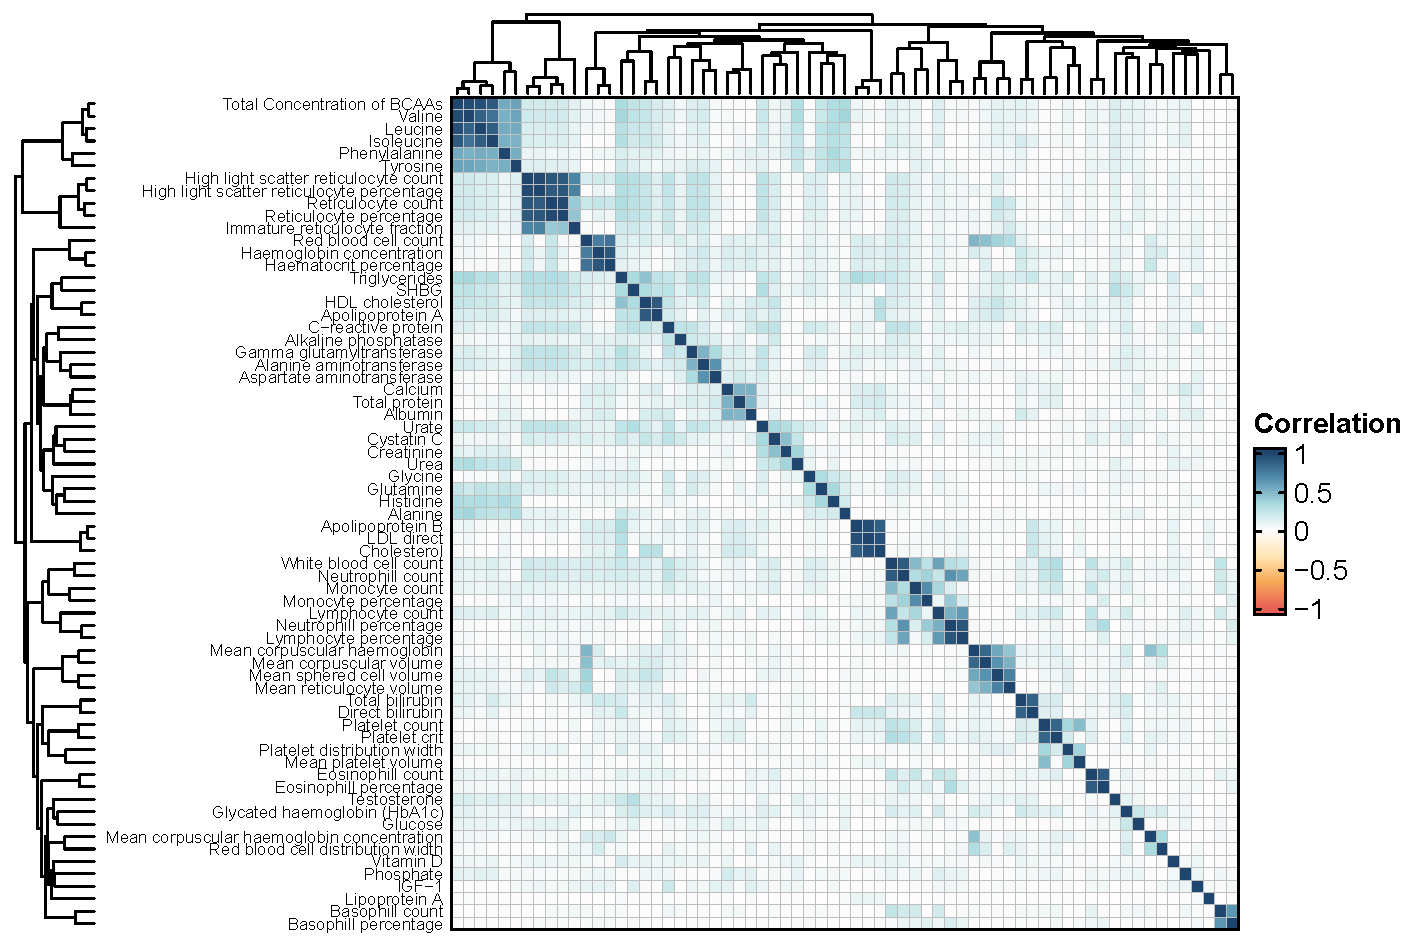
**

**Supplementary Figure 14. Heatmap shows pair-wise Pearson correlation among 67 blood biomarkers used for GxE analyses in UKB.** Traits are clustered hierarchically based on their similarity, with blue indicating strong positive correlations and red indicating strong negative correlations.

**
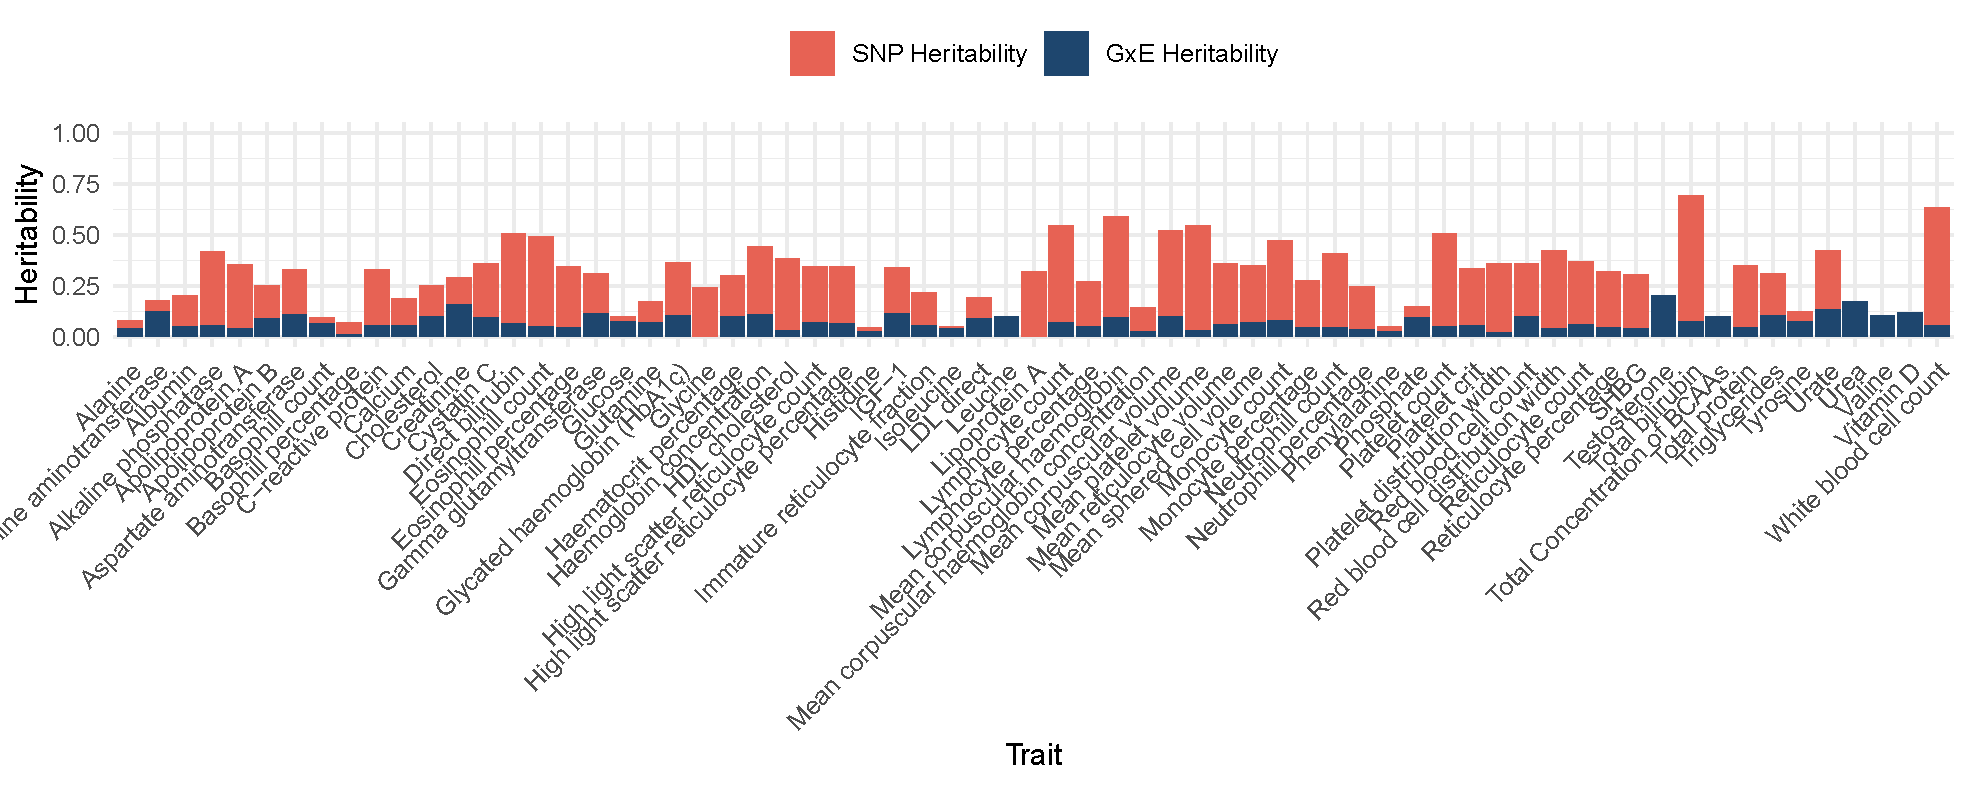
**

**Supplementary Figure 15. Estimate of genetic heritability and GxE heritability by fastGxE for 67 blood biomarkers in the UKB**

**
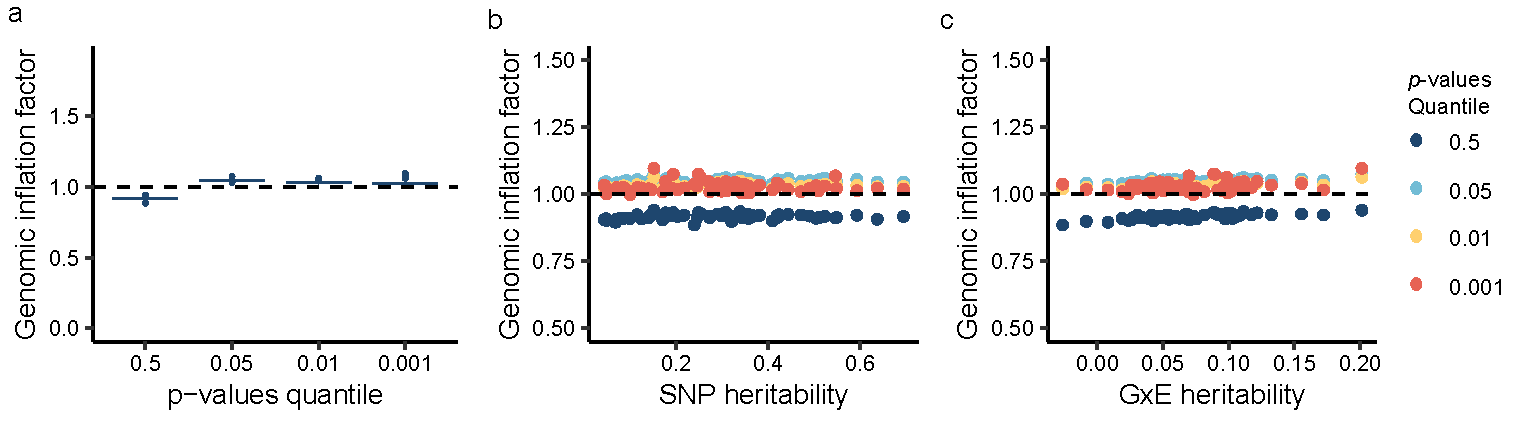
**

**Supplementary Figure 16. Genomic inflation factors for 67 blood biomarkers.** (a) Genomic inflation factors at various *p*-value quantiles; (b) Relationship between genomic inflation factors and SNP heritability levels across different *p*-value quantiles; (c) Relationship between genomic inflation factors and GxE heritability levels across different *p*-value quantiles.

**
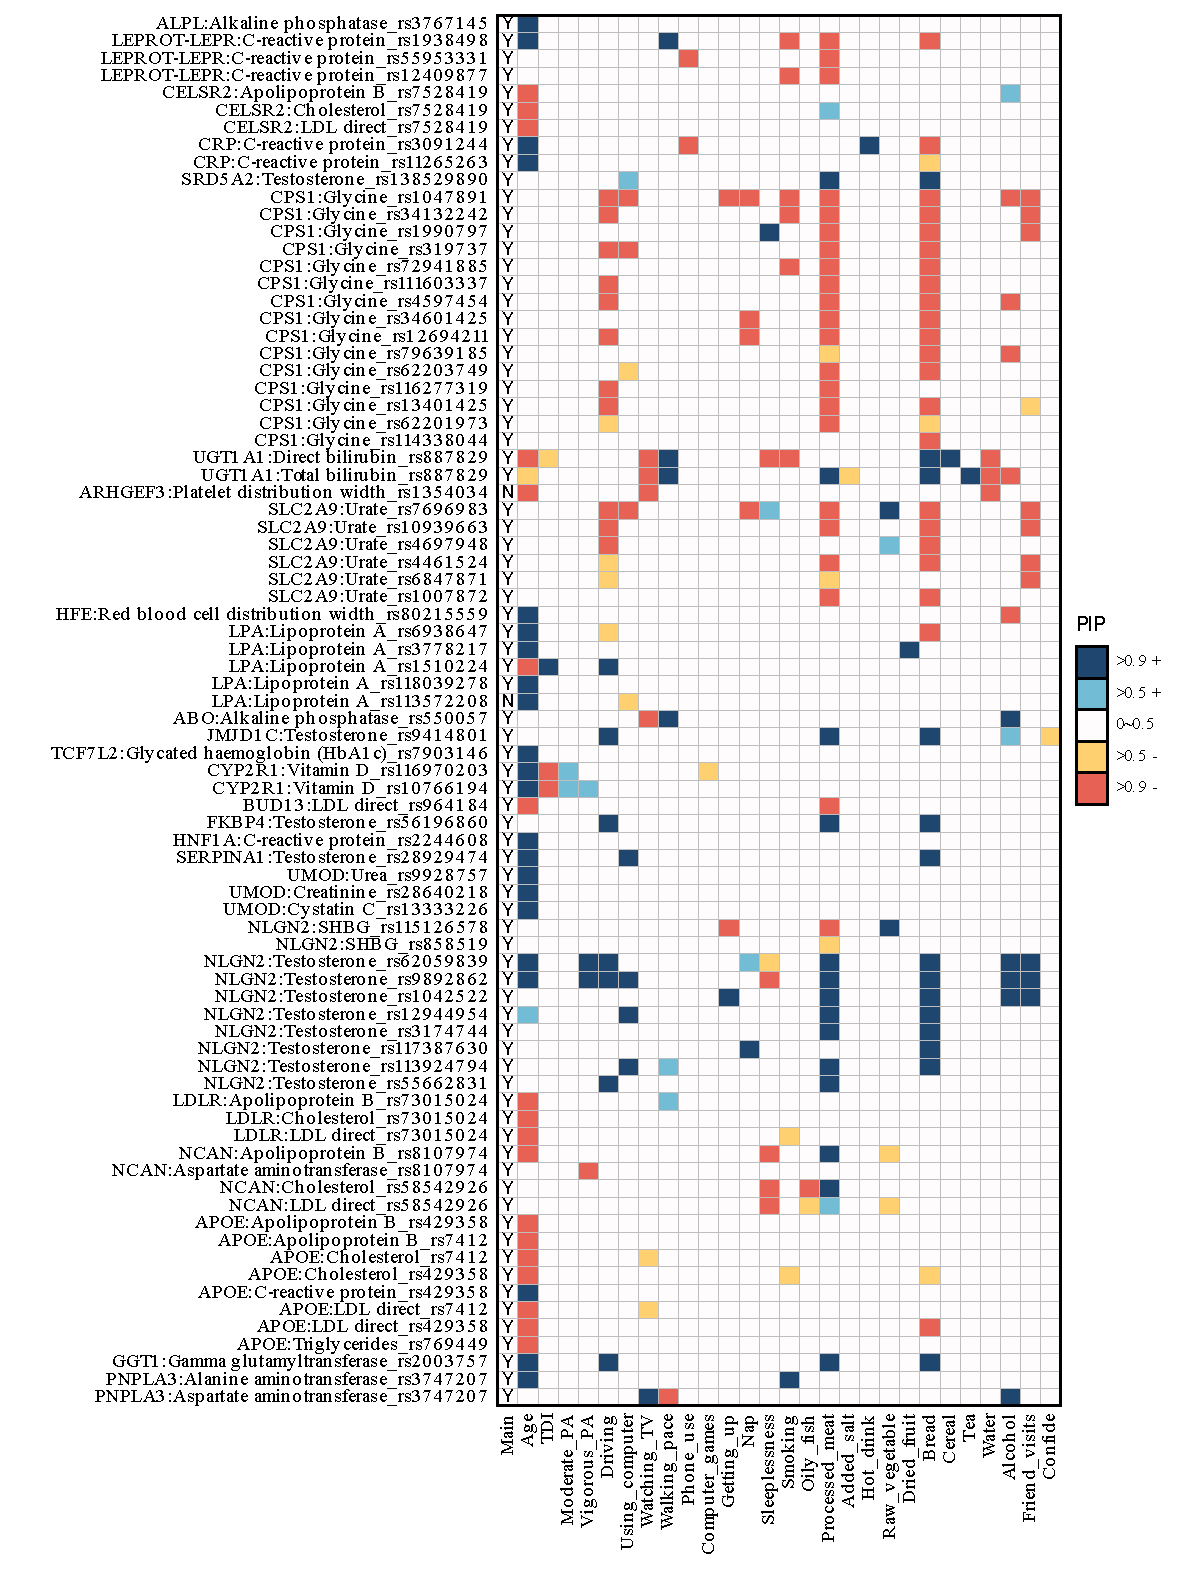
**

**Supplementary Figure 17.** A heatmap displaying the posterior inclusion probability (PIP) for GxE interactions between different environmental factors (x-axis) and the lead SNP in the identified genic region for various traits (y-axis). The first column shows whether the SNP main effect is significant (*p*-value < 7.46e-10).

**
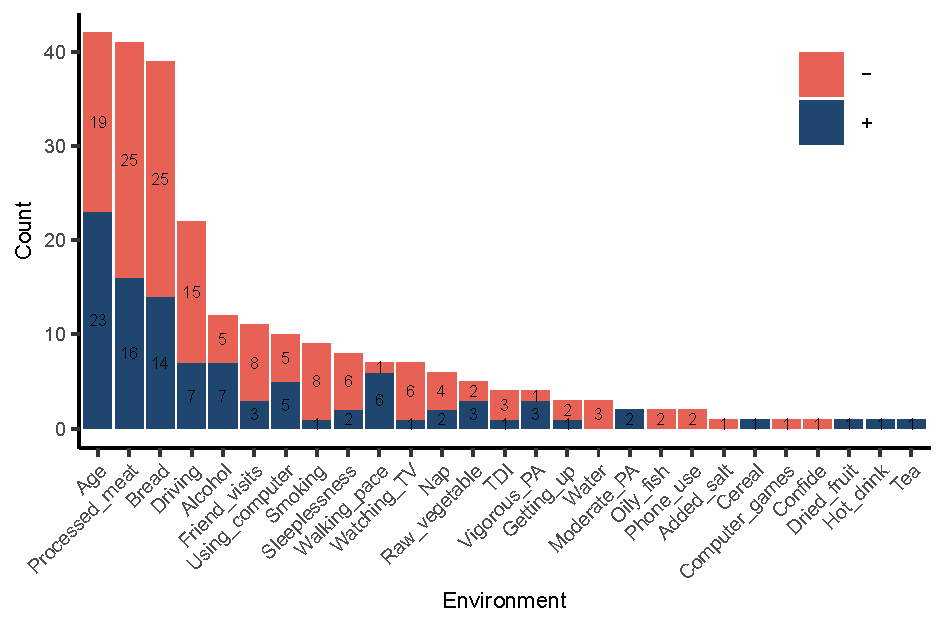
**

**Supplementary Figure 18. Bar plot showing the number of GxE associations involving a given environmental factor across 67 blood biomarkers in UKB.** Dark red bars represent GxE associations with GxE effects opposite to the SNP main effects, while blue bars represent associations with consistent effects.

**3 Supplementary Tables**

**Supplementary Table 1.** **Genomic inflation factors at different *p*-value quantiles (*q*=0.5, 0.05, 0.01, and 0.001) and different GxE heritability values (5%, 15%, and 25%) for fastGxE, StructLMM and fastGWA-GE in simulations.**

| SNP heritibility | GxE heritibility | Methods | *q*=0.5 | *q*=0.05 | *q*=0.01 | *q*=0.001 |
| --- | --- | --- | --- | --- | --- | --- |
| 0.30 | 0.05 | fastGxE | 0.916 | 1.059 | 1.036 | 1.021 |
| StructLMM | 1.064 | 1.039 | 1.035 | 1.030 |
| fastGWA-GE | 0.296 | 0.989 | 1.002 | 1.007 |
| 0.05 | 0.15 | fastGxE | 0.908 | 1.048 | 1.022 | 1.007 |
| StructLMM | 1.181 | 1.101 | 1.086 | 1.074 |
| fastGWA-GE | 0.295 | 0.989 | 1.002 | 1.006 |
| 0.30 | 0.15 | fastGxE | 0.918 | 1.058 | 1.034 | 1.019 |
| StructLMM | 1.184 | 1.101 | 1.087 | 1.075 |
| fastGWA-GE | 0.295 | 0.989 | 1.003 | 1.007 |
| 0.50 | 0.15 | fastGxE | 0.917 | 1.059 | 1.032 | 1.017 |
| StructLMM | 1.188 | 1.105 | 1.089 | 1.076 |
| fastGWA-GE | 0.294 | 0.989 | 1.003 | 1.004 |
| 0.30 | 0.25 | fastGxE | 0.920 | 1.057 | 1.031 | 1.018 |
| StructLMM | 1.380 | 1.198 | 1.166 | 1.141 |
| fastGWA-GE | 0.291 | 0.988 | 1.001 | 1.005 |

**Supplementary Table 2. Description of 32 physical traits used for GxE analyses in UKB.**

| Field ID | Trait Name | Short Name | Sample Size |
| --- | --- | --- | --- |
| 48 | Waist circumference | WC | 323,829 |
| 49 | Hip circumference | HC | 321,393 |
| 50 | Standing height | Height | 324,811 |
| 78 | Heel bone mineral density (BMD) T-score, automated | BMD | 214,580 |
| 102 | Pulse rate, automated reading | PR | 322,925 |
| 3062 | Forced vital capacity (FVC) | FVC | 297,797 |
| 3063 | Forced expiratory volume in 1-second (FEV1) | FEV1 | 297,725 |
| 4079 | Diastolic blood pressure, automated reading | DBP | 323,953 |
| 4080 | Systolic blood pressure, automated reading | SBP | 323,707 |
| 21001 | Body mass index (BMI) | BMI | 321,703 |
| 21002 | Weight | Weight | 322,699 |
| 23099 | Body fat percentage | BFP | 320,488 |
| 23100 | Whole body fat mass | BFM | 316,967 |
| 23101 | Whole body fat-free mass | BFFM | 320,198 |
| 23102 | Whole body water mass | BWM | 320,191 |
| 23105 | Basal metabolic rate | BMR | 319,438 |
| 23115 | Leg fat percentage (left) | LFP | 320,722 |
| 23116 | Leg fat mass (left) | LFM | 317,478 |
| 23117 | Leg fat-free mass (left) | LFFM | 319,346 |
| 23118 | Leg predicted mass (left) | LPM | 319,359 |
| 23123 | Arm fat percentage (left) | AFP | 320,098 |
| 23124 | Arm fat mass (left) | AFM | 315,778 |
| 23125 | Arm fat-free mass (left) | AFFM | 319,845 |
| 23126 | Arm predicted mass (left) | APM | 319,875 |
| 23127 | Trunk fat percentage | TFP | 319,342 |
| 23128 | Trunk fat mass | TFM | 318,348 |
| 23129 | Trunk fat-free mass | TFFM | 320,136 |
| 23130 | Trunk predicted mass | TPM | 320,122 |
| FFR | FEV1/ FVC ratio | FFR | 297,299 |
| PP | Pulse pressure | PP | 322,652 |
| WHR | Waist/Hip Ratio | WHR | 320,743 |
| WHRadjBMI | WHR adjusted for BMI | WHRadjBMI | 319,691 |

The table lists summary information for 32 physical traits in the UKB, including field ID in the UKB (1st column), trait name in the UKB (2nd column), short name (3rd column), and sample size for GxE analysis (4th column).

**Supplementary Table 3. Description of confounding covariates and interacting environmental factors used for GxE analyses in UKB.**

| Field ID | Unique Data ID | Field Name | Short Name | Category |
| --- | --- | --- | --- | --- |
| 22000 | 22000-0.0 | Genotype measurement batch | Genotype batch | confounding |
| 22009 | 22009-0.1 | Genetic principal components 1 | PCA1 | confounding |
| 22009 | 22009-0.2 | Genetic principal components 2 | PCA2 | confounding |
| 22009 | 22009-0.3 | Genetic principal components 3 | PCA3 | confounding |
| 22009 | 22009-0.4 | Genetic principal components 4 | PCA4 | confounding |
| 22009 | 22009-0.5 | Genetic principal components 5 | PCA5 | confounding |
| 22009 | 22009-0.6 | Genetic principal components 6 | PCA6 | confounding |
| 22009 | 22009-0.7 | Genetic principal components 7 | PCA7 | confounding |
| 22009 | 22009-0.8 | Genetic principal components 8 | PCA8 | confounding |
| 22009 | 22009-0.9 | Genetic principal components 9 | PCA9 | confounding |
| 22009 | 22009-0.10 | Genetic principal components 10 | PCA10 | confounding |
| 22009 | 22009-0.11 | Genetic principal components 11 | PCA11 | confounding |
| 22009 | 22009-0.12 | Genetic principal components 12 | PCA12 | confounding |
| 22009 | 22009-0.13 | Genetic principal components 13 | PCA13 | confounding |
| 22009 | 22009-0.14 | Genetic principal components 14 | PCA14 | confounding |
| 22009 | 22009-0.15 | Genetic principal components 15 | PCA15 | confounding |
| 22009 | 22009-0.16 | Genetic principal components 16 | PCA16 | confounding |
| 22009 | 22009-0.17 | Genetic principal components 17 | PCA17 | confounding |
| 22009 | 22009-0.18 | Genetic principal components 18 | PCA18 | confounding |
| 22009 | 22009-0.19 | Genetic principal components 19 | PCA19 | confounding |
| 22009 | 22009-0.20 | Genetic principal components 20 | PCA20 | confounding |
| 31 | 31-0.0 | Sex | Sex | confounding |
| 21003 | 21003-0.0 | Age when attended assessment centre | Age | interacting |
| 22189 | 22189-0.0 | Townsend deprivation index at recruitment | TDI | interacting |
| 943 | 943-0.0 | Frequency of stair climbing in last 4 weeks | Stair climbing | interacting |
| 884 | 884-0.0 | Number of days/week of moderate physical activity 10+ minutes | Moderate PA | interacting |
| 904 | 904-0.0 | Number of days/week of vigorous physical activity 10+ minutes | Vigorous PA | interacting |
| 864 | 864-0.0 | Number of days/week walked 10+ minutes | Walked | interacting |
| 1090 | 1090-0.0 | Time spent driving | Driving | interacting |
| 1080 | 1080-0.0 | Time spent using computer | Using computer | interacting |
| 1070 | 1070-0.0 | Time spent watching television (TV) | Watching TV | interacting |
| 924 | 924-0.0 | Usual walking pace | Walking pace | interacting |
| 1110 | 1110-0.0 | Length of mobile phone use | Phone use | interacting |
| 2237 | 2237-0.0 | Plays computer games | Computer games | interacting |
| 1160 | 1160-0.0 | Sleep duration | Sleep duration | interacting |
| 1170 | 1170-0.0 | Getting up in morning | Getting up | interacting |
| 1190 | 1190-0.0 | Nap during day | Nap | interacting |
| 1200 | 1200-0.0 | Sleeplessness / insomnia | Sleeplessness | interacting |
| 1220 | 1220-0.0 | Daytime dozing / sleeping | Daytime dozing | interacting |
| 20116 | 20116-0.0 | Smoking status | Smoking | interacting |
| 1289 | 1289-0.0 | Cooked vegetable intake | Cooked vegetable | interacting |
| 1299 | 1299-0.0 | Salad / raw vegetable intake | Raw vegetable | interacting |
| 1309 | 1309-0.0 | Fresh fruit intake | Fresh fruit | interacting |
| 1319 | 1319-0.0 | Dried fruit intake | Dried fruit | interacting |
| 1329 | 1329-0.0 | Oily fish intake | Oily fish | interacting |
| 1339 | 1339-0.0 | Non-oily fish intake | Non-oily fish | interacting |
| 1349 | 1349-0.0 | Processed meat intake | Processed meat | interacting |
| 1359 | 1359-0.0 | Poultry intake | Poultry | interacting |
| 1369 | 1369-0.0 | Beef intake | Beef | interacting |
| 1379 | 1379-0.0 | Lamb/mutton intake | Lamb | interacting |
| 1389 | 1389-0.0 | Pork intake | Pork | interacting |
| 1408 | 1408-0.0 | Cheese intake | Cheese | interacting |
| 1438 | 1438-0.0 | Bread intake | Bread | interacting |
| 1458 | 1458-0.0 | Cereal intake | Cereal | interacting |
| 1478 | 1478-0.0 | Salt added to food | Added salt | interacting |
| 1488 | 1488-0.0 | Tea intake | Tea | interacting |
| 1498 | 1498-0.0 | Coffee intake | Coffee | interacting |
| 1518 | 1518-0.0 | Hot drink temperature | Hot drink | interacting |
| 1528 | 1528-0.0 | Water intake | Water | interacting |
| 1548 | 1548-0.0 | Variation in diet | Variation diet | interacting |
| 1558 | 1558-0.0 | Alcohol intake frequency | Alcohol | interacting |
| 1031 | 1031-0.0 | Frequency of friend/family visits | Friend visits | interacting |
| 2110 | 2110-0.0 | Able to confide | Confide | interacting |

The table lists summary information for confounding covariates and interacting environmental factors in the UKB, including field ID in the UKB (1st column), unique data ID in the UKB (2nd column), filed name in the UKB (3rd column), short name (4th column), and category (4th column; confounding for confounding covariates and interacting for interacting environmental factors).

**Supplementary Table 4. Genomic inflation factors at different quantiles (*q*=0.5, 0.05, 0.01, and 0.001) in the GxE analysis by fastGxE for 32 physical traits.**

| Trait Name | *q*=0.5 | *q*=0.05 | *q*=0.01 | *q*=0.001 |
| --- | --- | --- | --- | --- |
| Waist circumference | 0.942 | 1.077 | 1.059 | 1.040 |
| Hip circumference | 0.938 | 1.070 | 1.047 | 1.038 |
| Standing height | 0.913 | 1.049 | 1.028 | 1.008 |
| Heel bone mineral density (BMD) T-score, automated | 0.918 | 1.055 | 1.037 | 1.031 |
| Pulse rate, automated reading | 0.915 | 1.045 | 1.036 | 1.034 |
| Forced vital capacity (FVC) | 0.917 | 1.048 | 1.026 | 1.018 |
| Forced expiratory volume in 1-second (FEV1) | 0.911 | 1.042 | 1.024 | 1.009 |
| Diastolic blood pressure, automated reading | 0.921 | 1.057 | 1.049 | 1.029 |
| Systolic blood pressure, automated reading | 0.920 | 1.046 | 1.022 | 1.005 |
| Body mass index (BMI) | 0.947 | 1.072 | 1.052 | 1.055 |
| Weight | 0.942 | 1.067 | 1.050 | 1.028 |
| Body fat percentage | 0.946 | 1.076 | 1.060 | 1.054 |
| Whole body fat mass | 0.944 | 1.072 | 1.059 | 1.052 |
| Whole body fat-free mass | 0.933 | 1.065 | 1.045 | 1.027 |
| Whole body water mass | 0.934 | 1.065 | 1.046 | 1.029 |
| Basal metabolic rate | 0.937 | 1.069 | 1.048 | 1.033 |
| Leg fat percentage (left) | 0.940 | 1.072 | 1.055 | 1.038 |
| Leg fat mass (left) | 0.942 | 1.070 | 1.061 | 1.050 |
| Leg fat-free mass (left) | 0.939 | 1.069 | 1.050 | 1.044 |
| Leg predicted mass (left) | 0.937 | 1.068 | 1.052 | 1.044 |
| Arm fat percentage (left) | 0.950 | 1.079 | 1.070 | 1.093 |
| Arm fat mass (left) | 0.948 | 1.077 | 1.067 | 1.083 |
| Arm fat-free mass (left) | 0.935 | 1.065 | 1.043 | 1.029 |
| Arm predicted mass (left) | 0.934 | 1.064 | 1.046 | 1.034 |
| Trunk fat percentage | 0.943 | 1.069 | 1.050 | 1.041 |
| Trunk fat mass | 0.944 | 1.068 | 1.049 | 1.046 |
| Trunk fat-free mass | 0.929 | 1.063 | 1.045 | 1.020 |
| Trunk predicted mass | 0.928 | 1.063 | 1.045 | 1.023 |
| FEV1/ FVC ratio | 0.911 | 1.040 | 1.022 | 1.015 |
| Pulse pressure | 0.924 | 1.062 | 1.046 | 1.073 |
| Waist/Hip Ratio | 0.934 | 1.065 | 1.044 | 1.042 |
| WHR adjusted for BMI | 0.927 | 1.061 | 1.043 | 1.054 |

**Supplementary Table 5. Summary of previously documented GxE associations for physical traits.**

| Gene locus | Trait | SNP | Environment | *p* | DOI | Sample Size | Sample Size (our) | *p* (our) | Replication |
| --- | --- | --- | --- | --- | --- | --- | --- | --- | --- |
| *WNT16* | BMD | rs6952851 | age | 5.35E-19 | 10.1093/bib/bbac547 | 260,042 | 214,580 | 1.38E-13 | Y |
| *CHRNA5-A3-B4* | FFR | rs8042849 | smoking | 2.88E-30 | 10.1093/bib/bbac547 | 412,179 | 297,299 | 3.98E-11 | Y |
| FFR | rs56077333 | smoking | 4.55E-25 | 10.1126/sciadv.aaw3538 | 316,614 | 297,299 | 3.29E-09 |
| FEV1 | rs8042849 | smoking | 5.66E-16 | 10.1093/bib/bbac547 | 412,179 | 297,725 | 5.94E-04 |
| WHRadjBMI | rs8040868 | smoking | 3.02E-11 | 10.1093/bib/bbac547 | 450,560 | 319,691 | 5.54E-06 |
| *APOE* | Waist circumference | rs7256200 | age | 8.03E-10 | 10.1093/bib/bbac547 | 451,361 | 323,829 | 7.82E-04 | N |
| *FTO* | BMI | rs11642015 | physical activity | 1.28E-10 | 10.1126/sciadv.aaw3538 | 346,393 | 321,703 | 3.93E-10 | Y |
| BMI | rs11642015 | sedentary time | 1.64E-09 | 10.1126/sciadv.aaw3538 | 346,393 | 321,703 | 3.93E-10 |
| Waist circumference | rs1421085 | sedentary time | 2.84E-08 | 10.1126/sciadv.aaw3538 | 347,158 | 323,829 | 3.41E-13 |
| BMI | rs1558902 | alcohol; diet; physical activity | 4.23E-16 | 10.1038/s41588-018-0271-0 | 450,681 | 321,703 | 3.87E-10 |

We examined previous GxE association studies for physical traits. The environmental factors considered in these previous studies were age and lifestyle. We defined previous GxE associations as the SNPs with GxE *p*-values below 5e-8. The table lists summary information including gene locus (1st column), trait name (2nd column), SNP ID (3rd column), interacting environmental factors (4th column), reported *p* value (5th column), digital object identifier (DOI) of reference (6th column), sample size in previous study (7th column), sample size in our study (8th column), p values in our study (9th column) and whether the locus is replicated by fastGxE (10th column).

**Supplementary Table 6. Summary of 61 SNP-environment interacting pairs identified by fastGxE across 32 physical traits.**

| Gene | Lead SNP | Trait | Environment | PIP | Direction |
| --- | --- | --- | --- | --- | --- |
| *LYPLAL1-AS1* | rs6674544 | WHRadjBMI | Sleeplessness | 0.939130488 | + |
| *LYPLAL1-AS1* | rs6674544 | WHRadjBMI | Processed meat | 0.995315817 | - |
| *LYPLAL1-AS1* | rs6674544 | WHRadjBMI | Alcohol | 0.994474577 | - |
| *COBLL1* | rs13389219 | WHRadjBMI | Using computer | 0.896604346 | - |
| *COBLL1* | rs13389219 | WHRadjBMI | Processed meat | 0.999832846 | - |
| *RSPO3* | rs577721086 | WHRadjBMI | Bread | 0.999997092 | - |
| *COBLL1* | rs13389219 | WHR | Using computer | 0.500958168 | - |
| *COBLL1* | rs13389219 | WHR | Watching TV | 0.524542582 | - |
| *RSPO3* | rs72961013 | WHR | Smoking | 0.512830493 | - |
| *RSPO3* | rs72961013 | WHR | Processed meat | 0.992400828 | - |
| *RSPO3* | rs72961013 | WHR | Bread | 0.512911782 | - |
| *RSPO3* | rs72961013 | WHR | Alcohol | 0.500228493 | - |
| *ULK4* | rs7647561 | PP | Age | 0.999999986 | + |
| *ULK4* | rs7647561 | PP | Cheese | 0.583122647 | - |
| *IGFBP3* | rs11977526 | PP | Age | 0.999999333 | + |
| *FBXO32* | rs34557926 | PP | Age | 0.99999999 | - |
| *WNT16* | rs2908007 | BMD | Age | 1 | + |
| *CHRNA5-A3-B4* | rs8042849 | FFR | Watching TV | 0.699959776 | + |
| *CHRNA5-A3-B4* | rs8042849 | FFR | Smoking | 0.999999998 | + |
| *CHRNA5-A3-B4* | rs8042849 | FFR | Water | 0.5021176 | - |
| *FTO* | rs12149574 | BMI | Stair climbing | 0.535021637 | - |
| *FTO* | rs12149574 | BMI | Alcohol | 0.998267176 | - |
| *FTO* | rs55872725 | Weight | Age | 0.985409303 | - |
| *FTO* | rs55872725 | Weight | Stair climbing | 0.990992165 | - |
| *FTO* | rs55872725 | Weight | Alcohol | 0.99983389 | - |
| *FTO* | rs12149574 | BFP | Age | 0.997288259 | - |
| *FTO* | rs12149574 | BFP | Stair climbing | 0.740557824 | - |
| *FTO* | rs12149574 | BFP | Alcohol | 0.999990045 | - |
| *FTO* | rs12149574 | BFM | Age | 0.95405152 | - |
| *FTO* | rs12149574 | BFM | Stair climbing | 0.522243859 | - |
| *FTO* | rs12149574 | BFM | Alcohol | 0.999932508 | - |
| *FTO* | rs55872725 | BFFM | Alcohol | 0.510107052 | - |
| *FTO* | rs55872725 | BWM | Alcohol | 0.516798766 | - |
| *FTO* | rs55872725 | BMR | Age | 0.514866737 | - |
| *FTO* | rs55872725 | BMR | Stair climbing | 0.899607906 | - |
| *FTO* | rs55872725 | BMR | Alcohol | 0.545930521 | - |
| *FTO* | rs12149574 | LFP | Age | 0.999825043 | - |
| *FTO* | rs12149574 | LFP | Alcohol | 0.99997101 | - |
| *FTO* | rs12149574 | LFM | Age | 0.9850712 | - |
| *FTO* | rs12149574 | LFM | Alcohol | 0.999939784 | - |
| *FTO* | rs55872725 | LFFM | Stair climbing | 0.933797924 | - |
| *FTO* | rs55872725 | LFFM | Alcohol | 0.991501588 | - |
| *FTO* | rs55872725 | LPM | Stair climbing | 0.937351881 | - |
| *FTO* | rs55872725 | LPM | Alcohol | 0.98732079 | - |
| *FTO* | rs8063057 | AFP | Age | 0.529201989 | - |
| *FTO* | rs8063057 | AFP | Stair climbing | 0.992694654 | - |
| *FTO* | rs8063057 | AFP | Alcohol | 0.999968509 | - |
| *FTO* | rs56094641 | AFFM | Age | 0.534542892 | - |
| *FTO* | rs56094641 | AFFM | Stair climbing | 0.86976066 | - |
| *FTO* | rs56094641 | AFFM | Alcohol | 0.526819272 | - |
| *FTO* | rs56094641 | APM | Age | 0.533862954 | - |
| *FTO* | rs56094641 | APM | Stair climbing | 0.514718428 | - |
| *FTO* | rs56094641 | APM | Alcohol | 0.518998694 | - |
| *FTO* | rs55872725 | TFFM | Age | 0.993615974 | - |
| *FTO* | rs55872725 | TPM | Age | 0.993347005 | - |
| *FTO* | rs55872725 | WC | Age | 0.522457236 | - |
| *FTO* | rs55872725 | WC | Stair climbing | 0.996617701 | - |
| *FTO* | rs55872725 | WC | Added salt | 0.520745322 | + |
| *FTO* | rs55872725 | WC | Alcohol | 0.999986353 | - |
| *FTO* | rs62033400 | HC | Stair climbing | 0.979466308 | - |
| *FTO* | rs62033400 | HC | Alcohol | 0.992948859 | - |

The table lists summary information for 61 SNP-environment interacting pairs (rows), including gene name (1st column), lead SNP (2nd column), trait name (3rd column), interacting environmental factors (4th column), posterior inclusion probability (PIP) (5th column), and whether the direction of SNP main effect and GxE effect is same (6th column; + for same and – for opposite).

**Supplementary Table 7. Aggregated interacting environment (AIE) scores stratified analysis for significant GxE associations identified by fastGxE across 32 physical traits.**

| Genomic region | Genes | Trait | Lead SNP | p1 | p2 | p3 | p4 | p5 | Wald p-value |
| --- | --- | --- | --- | --- | --- | --- | --- | --- | --- |
| 1:219449254-219515292 | *LYPLAL1-AS1* | WHR adjusted for BMI | rs6674544 | 1.22E-01 | 1.29E-04 | 2.29E-08 | 1.96E-15 | 8.59E-30 | 5.88E-14 |
| 2:164645339-164752884 | *COBLL1* | Waist/Hip Ratio | rs13389219 | 8.37E-03 | 1.18E-03 | 1.09E-07 | 1.16E-22 | 2.11E-23 | 9.69E-24 |
| 2:164645339-164752884 | *COBLL1* | WHR adjusted for BMI | rs13389219 | 2.42E-01 | 9.36E-03 | 5.85E-13 | 1.02E-18 | 8.42E-34 | 1.16E-18 |
| 3:41708768-42023513 | *ULK4* | Pulse pressure | rs7647561 | 2.14E-02 | 6.83E-05 | 6.11E-10 | 1.52E-14 | 1.91E-25 | 5.04E-12 |
| 6:127118752-127208635 | *RSPO3* | Waist/Hip Ratio | rs72961013 | 2.86E-06 | 4.39E-13 | 6.05E-18 | 7.98E-28 | 2.36E-46 | 7.97E-12 |
| 6:127118752-127208635 | *RSPO3* | WHR adjusted for BMI | rs577721086 | 2.29E-15 | 7.19E-27 | 2.55E-39 | 2.38E-49 | 1.73E-68 | 2.72E-14 |
| 7:45921046-45970501 | *IGFBP3* | Pulse pressure | rs11977526 | 7.08E-01 | 7.33E-06 | 1.08E-11 | 8.56E-16 | 3.54E-18 | 3.50E-13 |
| 7:121270692-121393067 | *WNT16* | Heel bone mineral density | rs2908007 | 8.09E-92 | 2.24E-111 | 4.45E-143 | 1.22E-177 | 8.38E-190 | 7.76E-16 |
| 8:123581944-123596374 | *FBXO32* | Pulse pressure | rs34557926 | 4.85E-04 | 3.29E-02 | 1.04E-01 | 3.30E-04 | 7.92E-09 | 2.34E-11 |
| 15:78427159-78643826 | *CHRNA5-A3-B4* | FEV1/FVC | rs8042849 | 8.88E-04 | 1.45E-01 | 7.14E-01 | 1.30E-01 | 6.31E-17 | 1.36E-16 |
| 16:53763996-53811575 | *FTO* | BMI | rs12149574 | 5.29E-06 | 2.76E-27 | 8.97E-30 | 4.58E-36 | 3.63E-57 | 3.84E-19 |
| 16:53763996-53811575 | *FTO* | Weight | rs55872725 | 5.71E-07 | 2.09E-22 | 6.16E-27 | 7.60E-49 | 7.54E-61 | 9.85E-23 |
| 16:53763996-53811575 | *FTO* | Body fat percentage | rs12149574 | 1.06E-02 | 3.53E-12 | 2.31E-14 | 5.93E-27 | 9.56E-46 | 4.33E-20 |
| 16:53763996-53811575 | *FTO* | Whole body fat mass | rs12149574 | 2.92E-04 | 1.89E-15 | 9.09E-19 | 3.01E-26 | 2.10E-53 | 3.84E-19 |
| 16:53763996-53811575 | *FTO* | Whole body fat-free mass | rs55872725 | 2.25E-04 | 5.65E-19 | 3.97E-22 | 1.36E-25 | 5.42E-68 | 4.55E-29 |
| 16:53763996-53811575 | *FTO* | Whole body water mass | rs55872725 | 2.42E-04 | 7.33E-20 | 1.82E-21 | 1.30E-25 | 1.59E-68 | 3.26E-29 |
| 16:53763996-53811575 | *FTO* | Basal metabolic rate | rs55872725 | 4.00E-08 | 2.88E-12 | 7.07E-28 | 3.01E-35 | 4.18E-61 | 2.75E-23 |
| 16:53763996-53811575 | *FTO* | Leg fat percentage | rs12149574 | 2.49E-03 | 1.69E-09 | 3.00E-14 | 7.10E-22 | 3.13E-48 | 3.48E-19 |
| 16:53763996-53811575 | *FTO* | Leg fat mass | rs12149574 | 4.40E-05 | 3.42E-15 | 2.58E-18 | 8.39E-24 | 9.28E-57 | 1.43E-19 |
| 16:53763996-53811575 | *FTO* | Leg fat-free mass | rs55872725 | 2.51E-08 | 6.62E-19 | 3.85E-27 | 2.72E-37 | 7.02E-64 | 6.58E-21 |
| 16:53763996-53811575 | *FTO* | Leg predicted mass | rs55872725 | 6.82E-09 | 2.96E-16 | 1.07E-28 | 1.57E-39 | 1.71E-62 | 4.23E-21 |
| 16:53763996-53811575 | *FTO* | Arm fat percentage | rs8063057 | 2.17E-04 | 7.48E-14 | 1.73E-20 | 2.16E-35 | 2.57E-50 | 1.55E-20 |
| 16:53763996-53811575 | *FTO* | Arm fat-free mass | rs56094641 | 6.12E-07 | 1.18E-08 | 4.76E-25 | 1.47E-24 | 4.88E-61 | 3.31E-24 |
| 16:53763996-53811575 | *FTO* | Arm predicted mass | rs56094641 | 6.62E-05 | 1.26E-13 | 3.35E-18 | 1.34E-23 | 9.21E-69 | 5.73E-29 |
| 16:53763996-53811575 | *FTO* | Trunk fat-free mass | rs55872725 | 4.47E-05 | 2.86E-09 | 5.06E-18 | 4.01E-27 | 6.49E-49 | 3.86E-19 |
| 16:53763996-53811575 | *FTO* | Trunk predicted mass | rs55872725 | 9.44E-06 | 2.54E-09 | 4.00E-16 | 1.41E-27 | 1.42E-48 | 2.52E-18 |
| 16:53763996-53811575 | *FTO* | Waist circumference | rs55872725 | 4.64E-05 | 1.85E-16 | 1.52E-25 | 1.75E-37 | 7.54E-55 | 7.95E-21 |
| 16:53763996-53811575 | *FTO* | Hip circumference | rs62033400 | 1.70E-05 | 7.20E-09 | 8.49E-32 | 6.87E-30 | 1.28E-47 | 4.52E-19 |

The table lists summary information for the AIE stratified analysis, including genomic region (1st column), gene (2nd column), trait name (3rd column), lead SNP (4th column), *p*-values of SNP main effects for five AIE quintile groups (5-9th column), and stratified Wald *p*-value (10th column).

**Supplementary Table 8. The table summarizes eQTL and sQTL annotation results of the lead SNPs in significant GxE regions for 32 physical traits.**

| rsID | chr | pos | tissue | gene | QTL type | p |
| --- | --- | --- | --- | --- | --- | --- |
| rs6674544 | 1 | 219628973 | Adipose_Subcutaneous | *RP11-392O17.1* | eQTL | 6.18E-05 |
| rs6674544 | 1 | 219628973 | Kidney_Cortex | *RP11-392O17.1* | eQTL | 4.24E-08 |
| rs6674544 | 1 | 219628973 | Skin_Not_Sun_Exposed_Suprapubic | *RP11-392O17.1* | eQTL | 2.00E-18 |
| rs6674544 | 1 | 219628973 | Skin_Sun_Exposed_Lower_leg | *SLC30A10* | eQTL | 2.51E-04 |
| rs6674544 | 1 | 219628973 | Skin_Sun_Exposed_Lower_leg | *RP11-392O17.1* | eQTL | 2.03E-19 |
| rs13389219 | 2 | 165528876 | Adipose_Subcutaneous | *SLC38A11* | eQTL | 1.60E-07 |
| rs13389219 | 2 | 165528876 | Artery_Tibial | *SLC38A11* | eQTL | 1.86E-04 |
| rs13389219 | 2 | 165528876 | Brain_Cerebellum | *COBLL1* | eQTL | 8.42E-05 |
| rs13389219 | 2 | 165528876 | Breast_Mammary_Tissue | *SLC38A11* | eQTL | 2.83E-07 |
| rs13389219 | 2 | 165528876 | Esophagus_Muscularis | *GRB14* | eQTL | 7.45E-07 |
| rs13389219 | 2 | 165528876 | Esophagus_Muscularis | *SLC38A11* | eQTL | 4.36E-05 |
| rs13389219 | 2 | 165528876 | Muscle_Skeletal | *SLC38A11* | eQTL | 3.37E-14 |
| rs13389219 | 2 | 165528876 | Nerve_Tibial | *SCN2A* | eQTL | 9.33E-11 |
| rs13389219 | 2 | 165528876 | Nerve_Tibial | *SLC38A11* | eQTL | 2.21E-05 |
| rs13389219 | 2 | 165528876 | Nerve_Tibial | *SNORA70F* | eQTL | 5.62E-05 |
| rs13389219 | 2 | 165528876 | Nerve_Tibial | *AC013463.2* | eQTL | 1.24E-06 |
| rs13389219 | 2 | 165528876 | Testis | *SLC38A11* | eQTL | 1.73E-05 |
| rs13389219 | 2 | 165528876 | Thyroid | *COBLL1* | eQTL | 1.75E-05 |
| rs13389219 | 2 | 165528876 | Thyroid | *SLC38A11* | eQTL | 4.51E-11 |
| rs13389219 | 2 | 165528876 | Adipose_Subcutaneous | *SLC38A11* | eQTL | 1.60E-07 |
| rs13389219 | 2 | 165528876 | Artery_Tibial | *SLC38A11* | eQTL | 1.86E-04 |
| rs13389219 | 2 | 165528876 | Brain_Cerebellum | *COBLL1* | eQTL | 8.42E-05 |
| rs13389219 | 2 | 165528876 | Breast_Mammary_Tissue | *SLC38A11* | eQTL | 2.83E-07 |
| rs13389219 | 2 | 165528876 | Esophagus_Muscularis | *GRB14* | eQTL | 7.45E-07 |
| rs13389219 | 2 | 165528876 | Esophagus_Muscularis | *SLC38A11* | eQTL | 4.36E-05 |
| rs13389219 | 2 | 165528876 | Muscle_Skeletal | *SLC38A11* | eQTL | 3.37E-14 |
| rs13389219 | 2 | 165528876 | Nerve_Tibial | *SCN2A* | eQTL | 9.33E-11 |
| rs13389219 | 2 | 165528876 | Nerve_Tibial | *SLC38A11* | eQTL | 2.21E-05 |
| rs13389219 | 2 | 165528876 | Nerve_Tibial | *SNORA70F* | eQTL | 5.62E-05 |
| rs13389219 | 2 | 165528876 | Nerve_Tibial | *AC013463.2* | eQTL | 1.24E-06 |
| rs13389219 | 2 | 165528876 | Testis | *SLC38A11* | eQTL | 1.73E-05 |
| rs13389219 | 2 | 165528876 | Thyroid | *COBLL1* | eQTL | 1.75E-05 |
| rs13389219 | 2 | 165528876 | Thyroid | *SLC38A11* | eQTL | 4.51E-11 |
| rs72961013 | 6 | 127529780 | Adipose_Subcutaneous | *RSPO3* | eQTL | 1.48E-04 |
| rs577721086 | 6 | 127440047 | Adipose_Subcutaneous | *RSPO3* | eQTL | 1.22E-06 |
| rs11977526 | 7 | 46008110 | Artery_Aorta | *IGFBP3* | eQTL | 1.26E-05 |
| rs11977526 | 7 | 46008110 | Brain_Cerebellar_Hemisphere | *IGFBP3* | eQTL | 3.96E-05 |
| rs11977526 | 7 | 46008110 | Brain_Cerebellum | *IGFBP3* | eQTL | 3.04E-06 |
| rs11977526 | 7 | 46008110 | Brain_Cortex | *IGFBP3* | eQTL | 2.74E-05 |
| rs11977526 | 7 | 46008110 | Heart_Left_Ventricle | *IGFBP3* | eQTL | 1.91E-07 |
| rs11977526 | 7 | 46008110 | Muscle_Skeletal | *IGFBP3* | eQTL | 7.56E-05 |
| rs11977526 | 7 | 46008110 | Muscle_Skeletal | *SEPT7P2* | eQTL | 1.38E-05 |
| rs11977526 | 7 | 46008110 | Nerve_Tibial | *SEPT7P2* | eQTL | 1.39E-04 |
| rs11977526 | 7 | 46008110 | Testis | *AC073115.6* | eQTL | 1.55E-06 |
| rs11977526 | 7 | 46008110 | Thyroid | *IGFBP3* | eQTL | 1.33E-07 |
| rs11977526 | 7 | 46008110 | Thyroid | *RP11-638I8.1* | eQTL | 4.01E-05 |
| rs2908007 | 7 | 120962164 | Adipose_Subcutaneous | *WNT16* | eQTL | 2.38E-09 |
| rs2908007 | 7 | 120962164 | Adipose_Subcutaneous | *FAM3C* | eQTL | 5.19E-05 |
| rs2908007 | 7 | 120962164 | Adipose_Visceral_Omentum | *FAM3C* | eQTL | 9.72E-05 |
| rs2908007 | 7 | 120962164 | Breast_Mammary_Tissue | *FAM3C* | eQTL | 6.43E-06 |
| rs2908007 | 7 | 120962164 | Heart_Left_Ventricle | *FAM3C* | eQTL | 5.21E-06 |
| rs2908007 | 7 | 120962164 | Muscle_Skeletal | *FAM3C* | eQTL | 4.13E-05 |
| rs2908007 | 7 | 120962164 | Cells_Cultured_fibroblasts | *CPED1* | eQTL | 8.17E-07 |
| rs2908007 | 7 | 120962164 | Skin_Not_Sun_Exposed_Suprapubic | *WNT16* | eQTL | 2.09E-07 |
| rs2908007 | 7 | 120962164 | Skin_Not_Sun_Exposed_Suprapubic | *FAM3C* | eQTL | 1.49E-06 |
| rs2908007 | 7 | 120962164 | Skin_Sun_Exposed_Lower_leg | *WNT16* | eQTL | 1.36E-09 |
| rs2908007 | 7 | 120962164 | Skin_Sun_Exposed_Lower_leg | *FAM3C* | eQTL | 2.65E-08 |
| rs2908007 | 7 | 120962164 | Testis | *CYCSP19* | eQTL | 1.74E-05 |
| rs34557926 | 8 | 124607159 | Heart_Atrial_Appendage | *WDYHV1* | eQTL | 1.19E-05 |
| rs34557926 | 8 | 124607159 | Skin_Sun_Exposed_Lower_leg | *WDYHV1* | eQTL | 2.76E-05 |
| rs8042849 | 15 | 78817929 | Adipose_Subcutaneous | *PSMA4* | eQTL | 1.41E-07 |
| rs8042849 | 15 | 78817929 | Adipose_Subcutaneous | *CHRNA5* | eQTL | 4.34E-20 |
| rs8042849 | 15 | 78817929 | Adipose_Subcutaneous | *RP11-650L12.2* | eQTL | 5.07E-05 |
| rs8042849 | 15 | 78817929 | Adipose_Visceral_Omentum | *CHRNA5* | eQTL | 3.60E-11 |
| rs8042849 | 15 | 78817929 | Adrenal_Gland | *PSMA4* | eQTL | 3.58E-06 |
| rs8042849 | 15 | 78817929 | Whole_Blood | *PSMA4* | eQTL | 2.47E-11 |
| rs8042849 | 15 | 78817929 | Whole_Blood | *IREB2* | eQTL | 5.05E-05 |
| rs8042849 | 15 | 78817929 | Artery_Aorta | *PSMA4* | eQTL | 8.09E-05 |
| rs8042849 | 15 | 78817929 | Artery_Aorta | *CHRNA5* | eQTL | 9.11E-05 |
| rs8042849 | 15 | 78817929 | Artery_Tibial | *ADAMTS7* | eQTL | 1.58E-07 |
| rs8042849 | 15 | 78817929 | Artery_Tibial | *CHRNA5* | eQTL | 1.14E-08 |
| rs8042849 | 15 | 78817929 | Brain_Anterior_cingulate_cortex_BA24 | *CHRNA5* | eQTL | 1.32E-06 |
| rs8042849 | 15 | 78817929 | Brain_Caudate_basal_ganglia | *CHRNA5* | eQTL | 1.69E-08 |
| rs8042849 | 15 | 78817929 | Brain_Caudate_basal_ganglia | *RP11-650L12.2* | eQTL | 1.99E-07 |
| rs8042849 | 15 | 78817929 | Brain_Cerebellar_Hemisphere | *CHRNA5* | eQTL | 8.88E-06 |
| rs8042849 | 15 | 78817929 | Brain_Cerebellum | *PSMA4* | eQTL | 7.11E-05 |
| rs8042849 | 15 | 78817929 | Brain_Cerebellum | *CHRNA5* | eQTL | 4.69E-05 |
| rs8042849 | 15 | 78817929 | Brain_Cortex | *PSMA4* | eQTL | 4.10E-06 |
| rs8042849 | 15 | 78817929 | Brain_Cortex | *CHRNA5* | eQTL | 5.75E-13 |
| rs8042849 | 15 | 78817929 | Brain_Frontal_Cortex_BA9 | *CHRNA5* | eQTL | 4.04E-08 |
| rs8042849 | 15 | 78817929 | Brain_Hippocampus | *CHRNA5* | eQTL | 6.74E-08 |
| rs8042849 | 15 | 78817929 | Brain_Hypothalamus | *PSMA4* | eQTL | 1.84E-06 |
| rs8042849 | 15 | 78817929 | Brain_Hypothalamus | *CHRNA5* | eQTL | 2.54E-08 |
| rs8042849 | 15 | 78817929 | Brain_Nucleus_accumbens_basal_ganglia | *CHRNA3* | eQTL | 3.02E-05 |
| rs8042849 | 15 | 78817929 | Brain_Nucleus_accumbens_basal_ganglia | *CHRNA5* | eQTL | 2.96E-12 |
| rs8042849 | 15 | 78817929 | Brain_Putamen_basal_ganglia | *CHRNA5* | eQTL | 3.30E-06 |
| rs8042849 | 15 | 78817929 | Brain_Spinal_cord_cervical_c-1 | *CHRNA5* | eQTL | 1.77E-06 |
| rs8042849 | 15 | 78817929 | Brain_Substantia_nigra | *CHRNA5* | eQTL | 4.31E-06 |
| rs8042849 | 15 | 78817929 | Breast_Mammary_Tissue | *CHRNA5* | eQTL | 1.08E-10 |
| rs8042849 | 15 | 78817929 | Colon_Sigmoid | *CHRNA3* | eQTL | 1.06E-07 |
| rs8042849 | 15 | 78817929 | Colon_Sigmoid | *CHRNA5* | eQTL | 3.71E-05 |
| rs8042849 | 15 | 78817929 | Colon_Transverse | *PSMA4* | eQTL | 2.61E-06 |
| rs8042849 | 15 | 78817929 | Esophagus_Gastroesophageal_Junction | *CHRNA5* | eQTL | 4.85E-06 |
| rs8042849 | 15 | 78817929 | Esophagus_Mucosa | *CHRNB4* | eQTL | 1.70E-05 |
| rs8042849 | 15 | 78817929 | Esophagus_Mucosa | *CHRNA5* | eQTL | 1.72E-09 |
| rs8042849 | 15 | 78817929 | Esophagus_Muscularis | *PSMA4* | eQTL | 7.46E-06 |
| rs8042849 | 15 | 78817929 | Esophagus_Muscularis | *CHRNA3* | eQTL | 1.77E-05 |
| rs8042849 | 15 | 78817929 | Heart_Atrial_Appendage | *PSMA4* | eQTL | 7.59E-11 |
| rs8042849 | 15 | 78817929 | Heart_Atrial_Appendage | *CHRNA5* | eQTL | 8.31E-15 |
| rs8042849 | 15 | 78817929 | Heart_Left_Ventricle | *PSMA4* | eQTL | 3.60E-13 |
| rs8042849 | 15 | 78817929 | Heart_Left_Ventricle | *CHRNA5* | eQTL | 1.04E-14 |
| rs8042849 | 15 | 78817929 | Lung | *CHRNA5* | eQTL | 2.41E-08 |
| rs8042849 | 15 | 78817929 | Muscle_Skeletal | *PSMA4* | eQTL | 3.35E-06 |
| rs8042849 | 15 | 78817929 | Muscle_Skeletal | *CHRNA3* | eQTL | 3.08E-16 |
| rs8042849 | 15 | 78817929 | Muscle_Skeletal | *CHRNA5* | eQTL | 2.13E-33 |
| rs8042849 | 15 | 78817929 | Muscle_Skeletal | *RP11-160C18.2* | eQTL | 3.56E-15 |
| rs8042849 | 15 | 78817929 | Nerve_Tibial | *PSMA4* | eQTL | 1.13E-07 |
| rs8042849 | 15 | 78817929 | Nerve_Tibial | *CHRNA3* | eQTL | 1.42E-09 |
| rs8042849 | 15 | 78817929 | Nerve_Tibial | *CHRNA5* | eQTL | 1.78E-25 |
| rs8042849 | 15 | 78817929 | Pituitary | *CHRNA5* | eQTL | 6.49E-06 |
| rs8042849 | 15 | 78817929 | Cells_Cultured_fibroblasts | *PSMA4* | eQTL | 7.67E-07 |
| rs8042849 | 15 | 78817929 | Cells_Cultured_fibroblasts | *CHRNA5* | eQTL | 8.59E-28 |
| rs8042849 | 15 | 78817929 | Cells_Cultured_fibroblasts | *RP11-650L12.2* | eQTL | 5.00E-12 |
| rs8042849 | 15 | 78817929 | Skin_Not_Sun_Exposed_Suprapubic | *CHRNA5* | eQTL | 3.73E-05 |
| rs8042849 | 15 | 78817929 | Skin_Sun_Exposed_Lower_leg | *CHRNA5* | eQTL | 2.13E-09 |
| rs8042849 | 15 | 78817929 | Testis | *RP11-650L12.2* | eQTL | 4.61E-06 |
| rs8042849 | 15 | 78817929 | Thyroid | *PSMA4* | eQTL | 1.55E-04 |
| rs8042849 | 15 | 78817929 | Thyroid | *CHRNA5* | eQTL | 3.99E-06 |
| rs12149574 | 16 | 53840525 | Muscle_Skeletal | *FTO* | eQTL | 8.99E-08 |
| rs12149574 | 16 | 53840525 | Pancreas | *IRX3* | eQTL | 3.04E-05 |
| rs55872725 | 16 | 53809123 | Muscle_Skeletal | *FTO* | eQTL | 6.32E-08 |
| rs55872725 | 16 | 53809123 | Pancreas | *IRX3* | eQTL | 1.08E-05 |
| rs12149574 | 16 | 53840525 | Muscle_Skeletal | *FTO* | eQTL | 8.99E-08 |
| rs12149574 | 16 | 53840525 | Pancreas | *IRX3* | eQTL | 3.04E-05 |
| rs12149574 | 16 | 53840525 | Muscle_Skeletal | *FTO* | eQTL | 8.99E-08 |
| rs12149574 | 16 | 53840525 | Pancreas | *IRX3* | eQTL | 3.04E-05 |
| rs55872725 | 16 | 53809123 | Muscle_Skeletal | *FTO* | eQTL | 6.32E-08 |
| rs55872725 | 16 | 53809123 | Pancreas | *IRX3* | eQTL | 1.08E-05 |
| rs55872725 | 16 | 53809123 | Muscle_Skeletal | *FTO* | eQTL | 6.32E-08 |
| rs55872725 | 16 | 53809123 | Pancreas | *IRX3* | eQTL | 1.08E-05 |
| rs55872725 | 16 | 53809123 | Muscle_Skeletal | *FTO* | eQTL | 6.32E-08 |
| rs55872725 | 16 | 53809123 | Pancreas | *IRX3* | eQTL | 1.08E-05 |
| rs12149574 | 16 | 53840525 | Muscle_Skeletal | *FTO* | eQTL | 8.99E-08 |
| rs12149574 | 16 | 53840525 | Pancreas | *IRX3* | eQTL | 3.04E-05 |
| rs12149574 | 16 | 53840525 | Muscle_Skeletal | *FTO* | eQTL | 8.99E-08 |
| rs12149574 | 16 | 53840525 | Pancreas | *IRX3* | eQTL | 3.04E-05 |
| rs55872725 | 16 | 53809123 | Muscle_Skeletal | *FTO* | eQTL | 6.32E-08 |
| rs55872725 | 16 | 53809123 | Pancreas | *IRX3* | eQTL | 1.08E-05 |
| rs55872725 | 16 | 53809123 | Muscle_Skeletal | *FTO* | eQTL | 6.32E-08 |
| rs55872725 | 16 | 53809123 | Pancreas | *IRX3* | eQTL | 1.08E-05 |
| rs8063057 | 16 | 53812433 | Muscle_Skeletal | *FTO* | eQTL | 2.47E-06 |
| rs56094641 | 16 | 53806453 | Muscle_Skeletal | *FTO* | eQTL | 6.45E-08 |
| rs56094641 | 16 | 53806453 | Pancreas | *IRX3* | eQTL | 8.31E-06 |
| rs56094641 | 16 | 53806453 | Muscle_Skeletal | *FTO* | eQTL | 6.45E-08 |
| rs56094641 | 16 | 53806453 | Pancreas | *IRX3* | eQTL | 8.31E-06 |
| rs55872725 | 16 | 53809123 | Muscle_Skeletal | *FTO* | eQTL | 6.32E-08 |
| rs55872725 | 16 | 53809123 | Pancreas | *IRX3* | eQTL | 1.08E-05 |
| rs55872725 | 16 | 53809123 | Muscle_Skeletal | *FTO* | eQTL | 6.32E-08 |
| rs55872725 | 16 | 53809123 | Pancreas | *IRX3* | eQTL | 1.08E-05 |
| rs55872725 | 16 | 53809123 | Muscle_Skeletal | *FTO* | eQTL | 6.32E-08 |
| rs55872725 | 16 | 53809123 | Pancreas | *IRX3* | eQTL | 1.08E-05 |
| rs62033400 | 16 | 53811788 | Muscle_Skeletal | *FTO* | eQTL | 3.94E-07 |
| rs62033400 | 16 | 53811788 | Pancreas | *IRX3* | eQTL | 4.78E-06 |
| rs7651190 | 3 | 41765955 | Cells - Cultured fibroblasts | *ULK4* | eQTL | 5.70E-128 |
| rs7651190 | 3 | 41765955 | Thyroid | *ULK4* | eQTL | 3.10E-99 |
| rs7651190 | 3 | 41765955 | Whole Blood | *ULK4* | eQTL | 8.40E-87 |
| rs7651190 | 3 | 41765955 | Esophagus - Mucosa | *ULK4* | eQTL | 2.90E-80 |
| rs7651190 | 3 | 41765955 | Artery - Aorta | *ULK4* | eQTL | 7.90E-71 |
| rs7651190 | 3 | 41765955 | Artery - Tibial | *ULK4* | eQTL | 6.70E-69 |
| rs7651190 | 3 | 41765955 | Nerve - Tibial | *ULK4* | eQTL | 2.20E-67 |
| rs7651190 | 3 | 41765955 | Pituitary | *ULK4* | eQTL | 5.10E-63 |
| rs7651190 | 3 | 41765955 | Cells - EBV-transformed lymphocytes | *ULK4* | eQTL | 9.90E-60 |
| rs7651190 | 3 | 41765955 | Esophagus - Muscularis | *ULK4* | eQTL | 9.10E-58 |
| rs7651190 | 3 | 41765955 | Skin - Sun Exposed (Lower leg) | *ULK4* | eQTL | 7.40E-57 |
| rs7651190 | 3 | 41765955 | Stomach | *ULK4* | eQTL | 3.70E-56 |
| rs7651190 | 3 | 41765955 | Muscle - Skeletal | *ULK4* | eQTL | 3.80E-55 |
| rs7651190 | 3 | 41765955 | Brain - Nucleus accumbens (basal ganglia) | *ULK4* | eQTL | 6.20E-50 |
| rs7651190 | 3 | 41765955 | Esophagus - Gastroesophageal Junction | *ULK4* | eQTL | 5.40E-43 |
| rs7651190 | 3 | 41765955 | Brain - Cortex | *ULK4* | eQTL | 1.10E-41 |
| rs7651190 | 3 | 41765955 | Brain - Frontal Cortex (BA9) | *ULK4* | eQTL | 7.10E-40 |
| rs7651190 | 3 | 41765955 | Brain - Putamen (basal ganglia) | *ULK4* | eQTL | 1.40E-38 |
| rs7651190 | 3 | 41765955 | Colon - Transverse | *ULK4* | eQTL | 1.60E-38 |
| rs7651190 | 3 | 41765955 | Pancreas | *ULK4* | eQTL | 3.00E-37 |
| rs7651190 | 3 | 41765955 | Adipose - Subcutaneous | *ULK4* | eQTL | 7.40E-37 |
| rs7651190 | 3 | 41765955 | Spleen | *ULK4* | eQTL | 1.70E-36 |
| rs7651190 | 3 | 41765955 | Skin - Not Sun Exposed (Suprapubic) | *ULK4* | eQTL | 4.60E-36 |
| rs7651190 | 3 | 41765955 | Brain - Caudate (basal ganglia) | *ULK4* | eQTL | 1.10E-32 |
| rs7651190 | 3 | 41765955 | Brain - Anterior qcingulate cortex (BA24) | *ULK4* | eQTL | 2.80E-32 |
| rs7651190 | 3 | 41765955 | Adipose - Visceral (Omentum) | *ULK4* | eQTL | 1.80E-31 |
| rs7651190 | 3 | 41765955 | Colon - Sigmoid | *ULK4* | eQTL | 5.00E-30 |
| rs7651190 | 3 | 41765955 | Brain - Hypothalamus | *ULK4* | eQTL | 6.70E-27 |
| rs7651190 | 3 | 41765955 | Lung | *ULK4* | eQTL | 7.00E-27 |
| rs7651190 | 3 | 41765955 | Brain - Spinal cord (cervical c-1) | *ULK4* | eQTL | 1.10E-25 |
| rs7651190 | 3 | 41765955 | Brain - Cerebellar Hemisphere | *ULK4* | eQTL | 1.70E-25 |
| rs7651190 | 3 | 41765955 | Adrenal Gland | *ULK4* | eQTL | 7.70E-25 |
| rs7651190 | 3 | 41765955 | Brain - Cerebellum | *ULK4* | eQTL | 6.90E-22 |
| rs7651190 | 3 | 41765955 | Brain - Hippocampus | *ULK4* | eQTL | 2.50E-21 |
| rs7651190 | 3 | 41765955 | Minor Salivary Gland | *ULK4* | eQTL | 1.30E-20 |
| rs7651190 | 3 | 41765955 | Artery - Coronary | *ULK4* | eQTL | 3.00E-20 |
| rs7651190 | 3 | 41765955 | Prostate | *ULK4* | eQTL | 3.70E-19 |
| rs7651190 | 3 | 41765955 | Breast - Mammary Tissue | *ULK4* | eQTL | 1.20E-18 |
| rs7651190 | 3 | 41765955 | Brain - Substantia nigra | *ULK4* | eQTL | 7.40E-18 |
| rs7651190 | 3 | 41765955 | Brain - Amygdala | *ULK4* | eQTL | 1.70E-17 |
| rs7651190 | 3 | 41765955 | Heart - Left Ventricle | *ULK4* | eQTL | 4.40E-15 |
| rs7651190 | 3 | 41765955 | Kidney - Cortex | *ULK4* | eQTL | 1.30E-11 |
| rs7651190 | 3 | 41765955 | Liver | *ULK4* | eQTL | 2.10E-11 |
| rs7651190 | 3 | 41765955 | Small Intestine - Terminal Ileum | *ULK4* | eQTL | 2.60E-10 |
| rs6674544 | 1 | 219628973 | Skin - Not Sun Exposed (Suprapubic) | *LYPLAL1-AS1* | eQTL | 1.90E-27 |
| rs6674544 | 1 | 219628973 | Skin - Sun Exposed (Lower leg) | *LYPLAL1-AS1* | eQTL | 2.30E-25 |
| rs6674544 | 1 | 219628973 | Kidney - Cortex | *LYPLAL1-AS1* | eQTL | 5.40E-14 |
| rs6674544 | 1 | 219628973 | Adrenal Gland | *LYPLAL1-AS1* | eQTL | 1.10E-05 |
| rs6674544 | 1 | 219628973 | Adipose - Subcutaneous | *LYPLAL1-AS1* | eQTL | 4.80E-05 |
| rs6674544 | 1 | 219628973 | Esophagus - Gastroesophageal Junction | *LYPLAL1-AS1* | eQTL | 8.10E-05 |
| rs6674544 | 1 | 219628973 | Adipose - Subcutaneous | *LYPLAL1-AS1* | sQTL | 4.70E-41 |
| rs6674544 | 1 | 219628973 | Skin - Sun Exposed (Lower leg) | *LYPLAL1-AS1* | sQTL | 3.60E-36 |
| rs6674544 | 1 | 219628973 | Skin - Sun Exposed (Lower leg) | *LYPLAL1-AS1* | sQTL | 7.40E-31 |
| rs6674544 | 1 | 219628973 | Breast - Mammary Tissue | *LYPLAL1-AS1* | sQTL | 1.20E-18 |
| rs6674544 | 1 | 219628973 | Adipose - Subcutaneous | *LYPLAL1-AS1* | sQTL | 2.60E-15 |
| rs6674544 | 1 | 219628973 | Adipose - Subcutaneous | *LYPLAL1-AS1* | sQTL | 6.10E-10 |
| rs6674544 | 1 | 219628973 | Skin - Sun Exposed (Lower leg) | *LYPLAL1-AS1* | sQTL | 3.90E-07 |
| rs6674544 | 1 | 219628973 | Adipose - Subcutaneous | *LYPLAL1-AS1* | sQTL | 1.00E-06 |
| rs6674544 | 1 | 219628973 | Skin - Sun Exposed (Lower leg) | *LYPLAL1-AS1* | sQTL | 2.60E-05 |

Results are obtained from GTEx V8 and include SNP ID (1st column), chromosome (2nd column), SNP base position (3rd column), analyzed tissue (4th column), tested gene (5th column), QTL type (6th column) and *p*-value (7th column).

**Supplementary Table 9. Description of 67 blood biomarkers used for GxE analyses in UKB.**

| Field ID | Trait Name | Short Name | Sample size |
| --- | --- | --- | --- |
| 23460 | Alanine | Ala | 180258 |
| 23461 | Glutamine | Gln | 180023 |
| 23462 | Glycine | Gly | 178913 |
| 23463 | Histidine | His | 180620 |
| 23464 | Total Concentration of Branched-Chain Amino Acids (Leucine + Isoleucine + Valine) | BCAA | 179181 |
| 23465 | Isoleucine | Ile | 178899 |
| 23466 | Leucine | Leu | 179151 |
| 23467 | Valine | Val | 179626 |
| 23468 | Phenylalanine | Phe | 180148 |
| 23469 | Tyrosine | Tyr | 179541 |
| 30000 | White blood cell (leukocyte) count | WBC | 312366 |
| 30010 | Red blood cell (erythrocyte) count | RBC | 312665 |
| 30020 | Haemoglobin concentration | Hb | 312492 |
| 30030 | Haematocrit percentage | Hct | 312560 |
| 30040 | Mean corpuscular volume | MCV | 311029 |
| 30050 | Mean corpuscular haemoglobin | MCH | 310799 |
| 30060 | Mean corpuscular haemoglobin concentration | MCHC | 312832 |
| 30070 | Red blood cell (erythrocyte) distribution width | RDW | 309631 |
| 30080 | Platelet count | PLT | 311288 |
| 30090 | Platelet crit | PCT | 311208 |
| 30100 | Mean platelet (thrombocyte) volume | MPV | 310996 |
| 30110 | Platelet distribution width | PDW | 310958 |
| 30120 | Lymphocyte count | Lymph# | 312887 |
| 30130 | Monocyte count | Mono# | 312106 |
| 30140 | Neutrophill count | Neut# | 310307 |
| 30150 | Eosinophill count | Eos# | 308758 |
| 30160 | Basophill count | Baso# | 309902 |
| 30180 | Lymphocyte percentage | Lymph% | 311634 |
| 30190 | Monocyte percentage | Mono% | 311769 |
| 30200 | Neutrophill percentage | Neut% | 311359 |
| 30210 | Eosinophill percentage | Eos% | 308621 |
| 30220 | Basophill percentage | Baso% | 310470 |
| 30240 | Reticulocyte percentage | Ret% | 308120 |
| 30250 | Reticulocyte count | Ret# | 308101 |
| 30260 | Mean reticulocyte volume | MRV | 305419 |
| 30270 | Mean sphered cell volume | MSCV | 306989 |
| 30280 | Immature reticulocyte fraction | IRF | 307219 |
| 30290 | High light scatter reticulocyte percentage | HLSR% | 308229 |
| 30300 | High light scatter reticulocyte count | HLSR# | 306416 |
| 30600 | Albumin | Alb | 281050 |
| 30610 | Alkaline phosphatase | ALP | 306237 |
| 30620 | Alanine aminotransferase | ALT | 303828 |
| 30630 | Apolipoprotein A | ApoA | 278694 |
| 30640 | Apolipoprotein B | ApoB | 305679 |
| 30650 | Aspartate aminotransferase | AST | 304103 |
| 30660 | Direct bilirubin | Bilirubin-Dir | 259105 |
| 30670 | Urea | Urea | 306065 |
| 30680 | Calcium | Ca | 280077 |
| 30690 | Cholesterol | TC | 307195 |
| 30700 | Creatinine | Creatinine | 306905 |
| 30710 | C-reactive protein | CRP | 302660 |
| 30720 | Cystatin C | CysC | 306123 |
| 30730 | Gamma glutamyltransferase | GGT | 303937 |
| 30740 | Glucose | Glu | 278081 |
| 30750 | Glycated haemoglobin (HbA1c) | HbA1c | 303498 |
| 30760 | HDL cholesterol | HDL | 279867 |
| 30770 | IGF-1 | IGF-1 | 304984 |
| 30780 | LDL direct | LDL | 306714 |
| 30790 | Lipoprotein A | LipA | 245727 |
| 30810 | Phosphate | PO4 | 280797 |
| 30830 | SHBG | SHBG | 275255 |
| 30840 | Total bilirubin | Bilirubin-Tot | 300805 |
| 30850 | Testosterone | TST | 279320 |
| 30860 | Total protein | TP | 280413 |
| 30870 | Triglycerides | TG | 303321 |
| 30880 | Urate | Urate | 306857 |
| 30890 | Vitamin D | VitD | 293466 |

The table lists summary information for 67 blood biomarkers in the UKB, including field ID in UKB (1st column), trait name in UKB (2nd column), short name (3rd column), and sample size for GxE analysis (4th column).

**Supplementary Table 10. Genomic inflation factors at different quantiles (*q*=0.5, 0.05, 0.01, and 0.001) in the GxE analysis by fastGxE for 67 blood biomarkers.**

| Trait Name | *q*=0.5 | *q*=0.05 | *q*=0.01 | *q*=0.001 |
| --- | --- | --- | --- | --- |
| Alanine | 0.911 | 1.039 | 1.026 | 1.023 |
| Glutamine | 0.904 | 1.036 | 1.021 | 1.008 |
| Glycine | 0.885 | 1.030 | 1.020 | 1.037 |
| Histidine | 0.904 | 1.042 | 1.025 | 1.033 |
| Total Concentration of Branched-Chain Amino Acids (Leucine + Isoleucine + Valine) | 0.910 | 1.043 | 1.029 | 1.025 |
| Isoleucine | 0.908 | 1.046 | 1.029 | 1.015 |
| Leucine | 0.907 | 1.042 | 1.025 | 1.024 |
| Valine | 0.909 | 1.047 | 1.031 | 1.024 |
| Phenylalanine | 0.902 | 1.039 | 1.023 | 1.001 |
| Tyrosine | 0.908 | 1.046 | 1.028 | 1.023 |
| White blood cell (leukocyte) count | 0.906 | 1.045 | 1.027 | 1.022 |
| Red blood cell (erythrocyte) count | 0.922 | 1.052 | 1.025 | 1.004 |
| Haemoglobin concentration | 0.924 | 1.059 | 1.039 | 1.017 |
| Haematocrit percentage | 0.919 | 1.049 | 1.031 | 1.011 |
| Mean corpuscular volume | 0.917 | 1.060 | 1.036 | 1.030 |
| Mean corpuscular haemoglobin | 0.921 | 1.055 | 1.032 | 1.013 |
| Mean corpuscular haemoglobin concentration | 0.912 | 1.045 | 1.026 | 1.020 |
| Red blood cell (erythrocyte) distribution width | 0.913 | 1.053 | 1.038 | 1.039 |
| Platelet count | 0.912 | 1.053 | 1.033 | 1.012 |
| Platelet crit | 0.919 | 1.049 | 1.030 | 1.019 |
| Mean platelet (thrombocyte) volume | 0.913 | 1.047 | 1.033 | 1.021 |
| Platelet distribution width | 0.909 | 1.039 | 1.016 | 1.009 |
| Lymphocyte count | 0.911 | 1.060 | 1.048 | 1.068 |
| Monocyte count | 0.922 | 1.047 | 1.028 | 1.009 |
| Neutrophill count | 0.900 | 1.038 | 1.021 | 1.015 |
| Eosinophill count | 0.918 | 1.051 | 1.032 | 1.020 |
| Basophill count | 0.911 | 1.051 | 1.027 | 1.016 |
| Lymphocyte percentage | 0.918 | 1.047 | 1.033 | 1.046 |
| Monocyte percentage | 0.912 | 1.039 | 1.027 | 1.009 |
| Neutrophill percentage | 0.912 | 1.043 | 1.026 | 1.030 |
| Eosinophill percentage | 0.913 | 1.049 | 1.028 | 1.004 |
| Basophill percentage | 0.895 | 1.037 | 1.024 | 1.015 |
| Reticulocyte percentage | 0.915 | 1.046 | 1.028 | 1.016 |
| Reticulocyte count | 0.918 | 1.048 | 1.033 | 1.019 |
| Mean reticulocyte volume | 0.914 | 1.055 | 1.040 | 1.029 |
| Mean sphered cell volume | 0.925 | 1.057 | 1.035 | 1.028 |
| Immature reticulocyte fraction | 0.921 | 1.045 | 1.028 | 1.023 |
| High light scatter reticulocyte percentage | 0.920 | 1.040 | 1.021 | 1.017 |
| High light scatter reticulocyte count | 0.925 | 1.046 | 1.027 | 1.037 |
| Albumin | 0.917 | 1.048 | 1.028 | 1.016 |
| Alkaline phosphatase | 0.919 | 1.050 | 1.033 | 1.041 |
| Alanine aminotransferase | 0.930 | 1.057 | 1.040 | 1.047 |
| Apolipoprotein A | 0.919 | 1.047 | 1.028 | 1.032 |
| Apolipoprotein B | 0.931 | 1.053 | 1.047 | 1.075 |
| Aspartate aminotransferase | 0.918 | 1.051 | 1.036 | 1.043 |
| Direct bilirubin | 0.910 | 1.044 | 1.029 | 1.031 |
| Urea | 0.922 | 1.050 | 1.033 | 1.015 |
| Calcium | 0.919 | 1.048 | 1.033 | 1.023 |
| Cholesterol | 0.928 | 1.056 | 1.045 | 1.062 |
| Creatinine | 0.926 | 1.056 | 1.044 | 1.039 |
| C-reactive protein | 0.916 | 1.054 | 1.034 | 1.044 |
| Cystatin C | 0.923 | 1.050 | 1.031 | 1.015 |
| Gamma glutamyltransferase | 0.932 | 1.061 | 1.035 | 1.046 |
| Glucose | 0.909 | 1.043 | 1.021 | 0.998 |
| Glycated haemoglobin (HbA1c) | 0.921 | 1.050 | 1.031 | 1.020 |
| HDL cholesterol | 0.921 | 1.046 | 1.034 | 1.034 |
| IGF-1 | 0.935 | 1.062 | 1.049 | 1.031 |
| LDL direct | 0.931 | 1.057 | 1.044 | 1.074 |
| Lipoprotein A | 0.898 | 1.041 | 1.026 | 1.017 |
| Phosphate | 0.924 | 1.052 | 1.035 | 1.015 |
| SHBG | 0.922 | 1.058 | 1.046 | 1.039 |
| Total bilirubin | 0.917 | 1.045 | 1.028 | 1.018 |
| Testosterone | 0.940 | 1.074 | 1.063 | 1.096 |
| Total protein | 0.914 | 1.042 | 1.027 | 1.018 |
| Triglycerides | 0.928 | 1.051 | 1.033 | 1.012 |
| Urate | 0.923 | 1.052 | 1.033 | 1.033 |
| Vitamin D | 0.923 | 1.054 | 1.035 | 1.024 |

**Supplementary Table 11. Summary of previously documented GxE associations for blood biomarkers.**

| Gene locus | Trait | SNP | Environment | *p* | DOI | Sample Size | Sample Size (our) | *p* (our) | Replication | Reason to fail replication |
| --- | --- | --- | --- | --- | --- | --- | --- | --- | --- | --- |
| *ADH1B* | Alanine aminotransferase | rs1229984 | Alcohol intake frequency. | 1.94E-12 | 10.1038/s41467-022-31625-5 | NA | 303828 | NA | N | Fail to pass the Hardy-Weinberg equilibrium: *p*=2.51e-13 in UKB data |
| Alanine aminotransferase | rs1229984 | Alcohol intake versus 10 years previously | 7.03E-08 | 10.1038/s41467-022-31625-5 | NA | 303828 | NA |
| *ABO* | Alkaline phosphatase | rs505922 | Coffee type | 1.02E-11 | 10.1038/s41467-022-31625-5 | NA | 306237 | 2.74E-11 | Y |  |
| Alkaline phosphatase | rs505922 | Alcohol intake frequency. | 1.40E-10 | 10.1038/s41467-022-31625-5 | NA | 306237 | 2.74E-11 |
| Alkaline phosphatase | rs505922 | Cereal type | 5.76E-09 | 10.1038/s41467-022-31625-5 | NA | 306237 | 2.74E-11 |
| *NCAN* | Apolipoprotein B | rs58489806 | Average weekly beer plus cider intake | 3.50E-09 | 10.1038/s41467-022-31625-5 | NA | 305679 | 2.78E-16 | Y |  |
| Apolipoprotein B | rs58489806 | Never eat eggs, dairy, wheat, sugar | 1.94E-07 | 10.1038/s41467-022-31625-5 | NA | 305679 | 2.78E-16 |
| *APOE* | Triglycerides | rs34954997 | Average weekly beer plus cider intake | 1.96E-09 | 10.1038/s41467-022-31625-5 | NA | 303321 | 2.54e10 (rs769449 LD r2=0.45) | Y |  |
| LDL direct | rs62117160 | Age | 8.75E-12 | 10.1038/s41467-024-50726-x | 310,574 | 306,714 | 2.10E-12 | Y |  |
| Cholesterol | rs814573 | Age | 2.49E-09 | 10.1038/s41467-024-50726-x | 311,166 | 307,195 | 1.55E-15 |
| *ARHGEF3* | Platelet distribution width | rs1354034 | Age | 9.09E-16 | 10.1038/s41467-024-50726-x | 316,707 | 310,958 | 9.44E-16 | Y |  |
| *CELSR2* | Cholesterol | rs12740374 | Age | 1.26E-12 | 10.1038/s41467-024-50726-x | 311,166 | 307,195 | 1.37E-13 | Y |  |
| LDL direct | rs12740374 | Age | 4.51E-13 | 10.1038/s41467-024-50726-x | 310,574 | 306,714 | 7.57E-14 |
| *HMGCR* | LDL direct | rs12916 | Age | 2.87E-08 | 10.1038/s41467-024-50726-x | 310,574 | 306,714 | 8.33E-03 | N | Differences in population composition |
| *PCSK9* | LDL direct | rs11591147 | Age | 4.09E-08 | 10.1038/s41467-024-50726-x | 310,574 | 306,714 | 6.63E-08 | N | Differences in population composition |
| *SMARCA4* | Cholesterol | rs56125973 | Age | 6.40E-17 | 10.1038/s41467-024-50726-x | 311,166 | 307,195 | 3.11E-13 | Y |  |
| LDL direct | rs112107114 | Age | 8.38E-18 | 10.1038/s41467-024-50726-x | 310,574 | 306,714 | 6.49E-14 |
| *TCF7L2* | Glycated haemoglobin (HbA1c) | rs7903146 | Age | 1.06E-08 | 10.1038/s41467-024-50726-x | 311,027 | 303,498 | 1.06E-09 | Y |  |
| *TRIB1* | Cholesterol | rs28601761 | Age | 8.89E-10 | 10.1038/s41467-024-50726-x | 311,166 | 307,195 | 3.98E-07 | N | Differences in population composition |
| LDL direct | rs28601761 | Age | 6.40E-10 | 10.1038/s41467-024-50726-x | 310,574 | 306,714 | 1.83E-06 |

We examined previous GxE association studies for blood biomarkers. The environmental factors considered in these previous studies were age and lifestyle. We defined previous GxE associations as the SNPs with GxE *p*-values below 5e-8. The table lists summary information including gene locus (1st column), trait name (2nd column), SNP ID (3rd column), interacting environmental factors (4th column), reported *p* value (5th column), digital object identifier (DOI) of reference (6th column), sample size in previous study (7th column), sample size in our study (8th column), *p* values in our study (9th column), whether the locus is replicated by fastGxE (10th column), and the possible reason to fail replication (11th column).

**Supplementary Table 12. Summary of 246 SNP-environment interacting pairs identified by fastGxE across 67 blood biomarkers.**

| Gene | Lead SNP | Trait | Environment | pip | direct |
| --- | --- | --- | --- | --- | --- |
| ALPL | rs3767145 | Alkaline phosphatase | Age | 1.000 | + |
| LEPROT-LEPR | rs1938498 | C-reactive protein | Age | 0.999 | + |
| LEPROT-LEPR | rs1938498 | C-reactive protein | Walking_pace | 0.989 | + |
| LEPROT-LEPR | rs1938498 | C-reactive protein | Smoking | 0.966 | - |
| LEPROT-LEPR | rs1938498 | C-reactive protein | Processed_meat | 0.999 | - |
| LEPROT-LEPR | rs1938498 | C-reactive protein | Bread | 1.000 | - |
| LEPROT-LEPR | rs55953331 | C-reactive protein | Phone_use | 0.919 | - |
| LEPROT-LEPR | rs55953331 | C-reactive protein | Processed_meat | 0.999 | - |
| LEPROT-LEPR | rs12409877 | C-reactive protein | Smoking | 0.997 | - |
| LEPROT-LEPR | rs12409877 | C-reactive protein | Processed_meat | 0.987 | - |
| CELSR2 | rs7528419 | Apolipoprotein B | Age | 1.000 | - |
| CELSR2 | rs7528419 | Apolipoprotein B | Alcohol | 0.862 | + |
| CELSR2 | rs7528419 | Cholesterol | Age | 1.000 | - |
| CELSR2 | rs7528419 | Cholesterol | Processed_meat | 0.811 | + |
| CELSR2 | rs7528419 | LDL direct | Age | 1.000 | - |
| CRP | rs3091244 | C-reactive protein | Age | 0.996 | + |
| CRP | rs3091244 | C-reactive protein | Phone_use | 0.933 | - |
| CRP | rs3091244 | C-reactive protein | Hot_drink | 0.948 | + |
| CRP | rs3091244 | C-reactive protein | Bread | 0.998 | - |
| CRP | rs11265263 | C-reactive protein | Age | 1.000 | + |
| CRP | rs11265263 | C-reactive protein | Bread | 0.720 | - |
| SRD5A2 | rs138529890 | Testosterone | Using_computer | 0.502 | + |
| SRD5A2 | rs138529890 | Testosterone | Processed_meat | 0.987 | + |
| SRD5A2 | rs138529890 | Testosterone | Bread | 1.000 | + |
| CPS1 | rs1047891 | Glycine | Driving | 1.000 | - |
| CPS1 | rs1047891 | Glycine | Using_computer | 1.000 | - |
| CPS1 | rs1047891 | Glycine | Getting_up | 1.000 | - |
| CPS1 | rs1047891 | Glycine | Nap | 1.000 | - |
| CPS1 | rs1047891 | Glycine | Smoking | 1.000 | - |
| CPS1 | rs1047891 | Glycine | Processed_meat | 1.000 | - |
| CPS1 | rs1047891 | Glycine | Bread | 1.000 | - |
| CPS1 | rs1047891 | Glycine | Alcohol | 1.000 | - |
| CPS1 | rs1047891 | Glycine | Friend_visits | 1.000 | - |
| CPS1 | rs34132242 | Glycine | Driving | 0.957 | - |
| CPS1 | rs34132242 | Glycine | Smoking | 1.000 | - |
| CPS1 | rs34132242 | Glycine | Processed_meat | 0.998 | - |
| CPS1 | rs34132242 | Glycine | Bread | 1.000 | - |
| CPS1 | rs34132242 | Glycine | Friend_visits | 1.000 | - |
| CPS1 | rs1990797 | Glycine | Sleeplessness | 0.997 | + |
| CPS1 | rs1990797 | Glycine | Processed_meat | 0.997 | - |
| CPS1 | rs1990797 | Glycine | Bread | 1.000 | - |
| CPS1 | rs1990797 | Glycine | Friend_visits | 0.998 | - |
| CPS1 | rs319737 | Glycine | Driving | 0.951 | - |
| CPS1 | rs319737 | Glycine | Using_computer | 0.994 | - |
| CPS1 | rs319737 | Glycine | Processed_meat | 1.000 | - |
| CPS1 | rs319737 | Glycine | Bread | 1.000 | - |
| CPS1 | rs72941885 | Glycine | Smoking | 0.994 | - |
| CPS1 | rs72941885 | Glycine | Processed_meat | 1.000 | - |
| CPS1 | rs72941885 | Glycine | Bread | 0.999 | - |
| CPS1 | rs111603337 | Glycine | Driving | 1.000 | - |
| CPS1 | rs111603337 | Glycine | Processed_meat | 1.000 | - |
| CPS1 | rs111603337 | Glycine | Bread | 0.998 | - |
| CPS1 | rs4597454 | Glycine | Driving | 1.000 | - |
| CPS1 | rs4597454 | Glycine | Processed_meat | 0.940 | - |
| CPS1 | rs4597454 | Glycine | Bread | 1.000 | - |
| CPS1 | rs4597454 | Glycine | Alcohol | 0.995 | - |
| CPS1 | rs34601425 | Glycine | Nap | 0.993 | - |
| CPS1 | rs34601425 | Glycine | Processed_meat | 0.974 | - |
| CPS1 | rs34601425 | Glycine | Bread | 1.000 | - |
| CPS1 | rs12694211 | Glycine | Driving | 0.955 | - |
| CPS1 | rs12694211 | Glycine | Nap | 0.968 | - |
| CPS1 | rs12694211 | Glycine | Processed_meat | 0.958 | - |
| CPS1 | rs12694211 | Glycine | Bread | 0.980 | - |
| CPS1 | rs79639185 | Glycine | Processed_meat | 0.525 | - |
| CPS1 | rs79639185 | Glycine | Bread | 1.000 | - |
| CPS1 | rs79639185 | Glycine | Alcohol | 0.979 | - |
| CPS1 | rs62203749 | Glycine | Using_computer | 0.503 | - |
| CPS1 | rs62203749 | Glycine | Processed_meat | 0.977 | - |
| CPS1 | rs62203749 | Glycine | Bread | 0.995 | - |
| CPS1 | rs116277319 | Glycine | Driving | 1.000 | - |
| CPS1 | rs116277319 | Glycine | Processed_meat | 0.999 | - |
| CPS1 | rs13401425 | Glycine | Driving | 0.934 | - |
| CPS1 | rs13401425 | Glycine | Processed_meat | 0.998 | - |
| CPS1 | rs13401425 | Glycine | Bread | 0.970 | - |
| CPS1 | rs13401425 | Glycine | Friend_visits | 0.580 | - |
| CPS1 | rs62201973 | Glycine | Driving | 0.794 | - |
| CPS1 | rs62201973 | Glycine | Processed_meat | 0.996 | - |
| CPS1 | rs62201973 | Glycine | Bread | 0.542 | - |
| CPS1 | rs114338044 | Glycine | Bread | 1.000 | - |
| UGT1A1 | rs887829 | Direct bilirubin | Age | 0.918 | - |
| UGT1A1 | rs887829 | Direct bilirubin | TDI | 0.676 | - |
| UGT1A1 | rs887829 | Direct bilirubin | Watching_TV | 1.000 | - |
| UGT1A1 | rs887829 | Direct bilirubin | Walking_pace | 1.000 | + |
| UGT1A1 | rs887829 | Direct bilirubin | Sleeplessness | 0.934 | - |
| UGT1A1 | rs887829 | Direct bilirubin | Smoking | 0.983 | - |
| UGT1A1 | rs887829 | Direct bilirubin | Bread | 1.000 | + |
| UGT1A1 | rs887829 | Direct bilirubin | Cereal | 1.000 | + |
| UGT1A1 | rs887829 | Direct bilirubin | Water | 1.000 | - |
| UGT1A1 | rs887829 | Total bilirubin | Age | 0.696 | - |
| UGT1A1 | rs887829 | Total bilirubin | Watching_TV | 0.996 | - |
| UGT1A1 | rs887829 | Total bilirubin | Walking_pace | 0.999 | + |
| UGT1A1 | rs887829 | Total bilirubin | Processed_meat | 0.923 | + |
| UGT1A1 | rs887829 | Total bilirubin | Added_salt | 0.737 | - |
| UGT1A1 | rs887829 | Total bilirubin | Bread | 1.000 | + |
| UGT1A1 | rs887829 | Total bilirubin | Tea | 0.934 | + |
| UGT1A1 | rs887829 | Total bilirubin | Water | 0.971 | - |
| UGT1A1 | rs887829 | Total bilirubin | Alcohol | 1.000 | - |
| ARHGEF3 | rs1354034 | Platelet distribution width | Age | 1.000 | - |
| ARHGEF3 | rs1354034 | Platelet distribution width | Watching_TV | 0.992 | - |
| ARHGEF3 | rs1354034 | Platelet distribution width | Water | 0.958 | - |
| SLC2A9 | rs7696983 | Urate | Driving | 1.000 | - |
| SLC2A9 | rs7696983 | Urate | Using_computer | 0.966 | - |
| SLC2A9 | rs7696983 | Urate | Nap | 1.000 | - |
| SLC2A9 | rs7696983 | Urate | Sleeplessness | 0.851 | + |
| SLC2A9 | rs7696983 | Urate | Processed_meat | 1.000 | - |
| SLC2A9 | rs7696983 | Urate | Raw_vegetable | 0.976 | + |
| SLC2A9 | rs7696983 | Urate | Bread | 1.000 | - |
| SLC2A9 | rs7696983 | Urate | Friend_visits | 1.000 | - |
| SLC2A9 | rs10939663 | Urate | Driving | 0.998 | - |
| SLC2A9 | rs10939663 | Urate | Processed_meat | 0.944 | - |
| SLC2A9 | rs10939663 | Urate | Bread | 1.000 | - |
| SLC2A9 | rs10939663 | Urate | Friend_visits | 1.000 | - |
| SLC2A9 | rs4697948 | Urate | Driving | 1.000 | - |
| SLC2A9 | rs4697948 | Urate | Raw_vegetable | 0.784 | + |
| SLC2A9 | rs4697948 | Urate | Bread | 1.000 | - |
| SLC2A9 | rs4461524 | Urate | Driving | 0.872 | - |
| SLC2A9 | rs4461524 | Urate | Processed_meat | 0.971 | - |
| SLC2A9 | rs4461524 | Urate | Bread | 1.000 | - |
| SLC2A9 | rs4461524 | Urate | Friend_visits | 0.904 | - |
| SLC2A9 | rs6847871 | Urate | Driving | 0.534 | - |
| SLC2A9 | rs6847871 | Urate | Processed_meat | 0.892 | - |
| SLC2A9 | rs6847871 | Urate | Friend_visits | 0.954 | - |
| SLC2A9 | rs1007872 | Urate | Processed_meat | 0.985 | - |
| SLC2A9 | rs1007872 | Urate | Bread | 0.970 | - |
| HFE | rs80215559 | Red blood cell distribution width | Age | 0.994 | + |
| HFE | rs80215559 | Red blood cell distribution width | Alcohol | 1.000 | - |
| LPA | rs6938647 | Lipoprotein A | Age | 1.000 | + |
| LPA | rs6938647 | Lipoprotein A | Driving | 0.883 | - |
| LPA | rs6938647 | Lipoprotein A | Bread | 0.927 | - |
| LPA | rs3778217 | Lipoprotein A | Age | 0.999 | + |
| LPA | rs3778217 | Lipoprotein A | Dried_fruit | 0.957 | + |
| LPA | rs1510224 | Lipoprotein A | Age | 1.000 | - |
| LPA | rs1510224 | Lipoprotein A | TDI | 0.980 | + |
| LPA | rs1510224 | Lipoprotein A | Driving | 0.955 | + |
| LPA | rs118039278 | Lipoprotein A | Age | 1.000 | - |
| LPA | rs113572208 | Lipoprotein A | Age | 1.000 | + |
| LPA | rs113572208 | Lipoprotein A | Using_computer | 0.553 | - |
| ABO | rs550057 | Alkaline phosphatase | Watching_TV | 1.000 | - |
| ABO | rs550057 | Alkaline phosphatase | Walking_pace | 0.903 | + |
| ABO | rs550057 | Alkaline phosphatase | Alcohol | 1.000 | + |
| JMJD1C | rs9414801 | Testosterone | Driving | 0.998 | + |
| JMJD1C | rs9414801 | Testosterone | Processed_meat | 1.000 | + |
| JMJD1C | rs9414801 | Testosterone | Bread | 1.000 | + |
| JMJD1C | rs9414801 | Testosterone | Alcohol | 0.896 | + |
| JMJD1C | rs9414801 | Testosterone | Confide | 0.549 | - |
| TCF7L2 | rs7903146 | Glycated haemoglobin (HbA1c) | Age | 1.000 | + |
| CYP2R1 | rs116970203 | Vitamin D | Age | 0.997 | + |
| CYP2R1 | rs116970203 | Vitamin D | TDI | 0.966 | - |
| CYP2R1 | rs116970203 | Vitamin D | Moderate_PA | 0.845 | + |
| CYP2R1 | rs116970203 | Vitamin D | Computer_games | 0.503 | - |
| CYP2R1 | rs10766194 | Vitamin D | Age | 0.995 | + |
| CYP2R1 | rs10766194 | Vitamin D | TDI | 1.000 | - |
| CYP2R1 | rs10766194 | Vitamin D | Moderate_PA | 0.602 | + |
| CYP2R1 | rs10766194 | Vitamin D | Vigorous_PA | 0.505 | + |
| BUD13 | rs964184 | LDL direct | Age | 1.000 | - |
| BUD13 | rs964184 | LDL direct | Processed_meat | 0.909 | - |
| FKBP4 | rs56196860 | Testosterone | Driving | 0.965 | + |
| FKBP4 | rs56196860 | Testosterone | Processed_meat | 0.997 | + |
| FKBP4 | rs56196860 | Testosterone | Bread | 1.000 | + |
| HNF1A | rs2244608 | C-reactive protein | Age | 1.000 | + |
| SERPINA1 | rs28929474 | Testosterone | Age | 0.997 | + |
| SERPINA1 | rs28929474 | Testosterone | Using_computer | 0.981 | + |
| SERPINA1 | rs28929474 | Testosterone | Bread | 0.999 | + |
| UMOD | rs9928757 | Urea | Age | 1.000 | + |
| UMOD | rs28640218 | Creatinine | Age | 1.000 | + |
| UMOD | rs13333226 | Cystatin C | Age | 1.000 | + |
| NLGN2 | rs62059839 | Testosterone | Age | 1.000 | + |
| NLGN2 | rs62059839 | Testosterone | Vigorous_PA | 0.999 | + |
| NLGN2 | rs62059839 | Testosterone | Driving | 1.000 | + |
| NLGN2 | rs62059839 | Testosterone | Nap | 0.522 | + |
| NLGN2 | rs62059839 | Testosterone | Sleeplessness | 0.890 | - |
| NLGN2 | rs62059839 | Testosterone | Processed_meat | 1.000 | + |
| NLGN2 | rs62059839 | Testosterone | Bread | 1.000 | + |
| NLGN2 | rs62059839 | Testosterone | Alcohol | 0.993 | + |
| NLGN2 | rs62059839 | Testosterone | Friend_visits | 1.000 | + |
| NLGN2 | rs9892862 | Testosterone | Age | 0.946 | + |
| NLGN2 | rs9892862 | Testosterone | Vigorous_PA | 0.986 | + |
| NLGN2 | rs9892862 | Testosterone | Driving | 1.000 | + |
| NLGN2 | rs9892862 | Testosterone | Using_computer | 0.998 | + |
| NLGN2 | rs9892862 | Testosterone | Sleeplessness | 0.999 | - |
| NLGN2 | rs9892862 | Testosterone | Processed_meat | 1.000 | + |
| NLGN2 | rs9892862 | Testosterone | Bread | 1.000 | + |
| NLGN2 | rs9892862 | Testosterone | Alcohol | 0.973 | + |
| NLGN2 | rs9892862 | Testosterone | Friend_visits | 0.957 | + |
| NLGN2 | rs1042522 | Testosterone | Getting_up | 0.913 | + |
| NLGN2 | rs1042522 | Testosterone | Processed_meat | 1.000 | + |
| NLGN2 | rs1042522 | Testosterone | Bread | 1.000 | + |
| NLGN2 | rs1042522 | Testosterone | Alcohol | 0.978 | + |
| NLGN2 | rs1042522 | Testosterone | Friend_visits | 0.998 | + |
| NLGN2 | rs12944954 | Testosterone | Age | 0.513 | + |
| NLGN2 | rs12944954 | Testosterone | Using_computer | 1.000 | + |
| NLGN2 | rs12944954 | Testosterone | Processed_meat | 1.000 | + |
| NLGN2 | rs12944954 | Testosterone | Bread | 1.000 | + |
| NLGN2 | rs3174744 | Testosterone | Processed_meat | 1.000 | + |
| NLGN2 | rs3174744 | Testosterone | Bread | 1.000 | + |
| NLGN2 | rs117387630 | Testosterone | Nap | 0.991 | + |
| NLGN2 | rs117387630 | Testosterone | Bread | 0.989 | + |
| NLGN2 | rs113924794 | Testosterone | Using_computer | 0.999 | + |
| NLGN2 | rs113924794 | Testosterone | Walking_pace | 0.530 | + |
| NLGN2 | rs113924794 | Testosterone | Processed_meat | 0.914 | + |
| NLGN2 | rs113924794 | Testosterone | Bread | 1.000 | + |
| NLGN2 | rs55662831 | Testosterone | Driving | 0.993 | + |
| NLGN2 | rs55662831 | Testosterone | Processed_meat | 0.999 | + |
| NLGN2 | rs115126578 | SHBG | Getting_up | 0.914 | - |
| NLGN2 | rs115126578 | SHBG | Processed_meat | 1.000 | - |
| NLGN2 | rs115126578 | SHBG | Raw_vegetable | 0.971 | + |
| NLGN2 | rs858519 | SHBG | Processed_meat | 0.518 | - |
| LDLR | rs73015024 | Apolipoprotein B | Age | 1.000 | - |
| LDLR | rs73015024 | Apolipoprotein B | Walking_pace | 0.517 | + |
| LDLR | rs73015024 | Cholesterol | Age | 1.000 | - |
| LDLR | rs73015024 | LDL direct | Age | 1.000 | - |
| LDLR | rs73015024 | LDL direct | Smoking | 0.782 | - |
| NCAN | rs8107974 | Apolipoprotein B | Age | 0.996 | - |
| NCAN | rs8107974 | Apolipoprotein B | Sleeplessness | 0.997 | - |
| NCAN | rs8107974 | Apolipoprotein B | Processed_meat | 0.951 | + |
| NCAN | rs8107974 | Apolipoprotein B | Raw_vegetable | 0.560 | - |
| NCAN | rs58542926 | Cholesterol | Sleeplessness | 0.971 | - |
| NCAN | rs58542926 | Cholesterol | Oily_fish | 0.987 | - |
| NCAN | rs58542926 | Cholesterol | Processed_meat | 0.908 | + |
| NCAN | rs58542926 | LDL direct | Sleeplessness | 0.991 | - |
| NCAN | rs58542926 | LDL direct | Oily_fish | 0.507 | - |
| NCAN | rs58542926 | LDL direct | Processed_meat | 0.539 | + |
| NCAN | rs58542926 | LDL direct | Raw_vegetable | 0.508 | - |
| NCAN | rs8107974 | Aspartate aminotransferase | Vigorous_PA | 0.997 | - |
| APOE | rs429358 | C-reactive protein | Age | 1.000 | + |
| APOE | rs429358 | Apolipoprotein B | Age | 1.000 | - |
| APOE | rs7412 | Apolipoprotein B | Age | 1.000 | - |
| APOE | rs7412 | Cholesterol | Age | 1.000 | - |
| APOE | rs7412 | Cholesterol | Watching_TV | 0.896 | - |
| APOE | rs429358 | Cholesterol | Age | 1.000 | - |
| APOE | rs429358 | Cholesterol | Smoking | 0.869 | - |
| APOE | rs429358 | Cholesterol | Bread | 0.571 | - |
| APOE | rs7412 | LDL direct | Age | 1.000 | - |
| APOE | rs7412 | LDL direct | Watching_TV | 0.758 | - |
| APOE | rs429358 | LDL direct | Age | 1.000 | - |
| APOE | rs429358 | LDL direct | Bread | 0.994 | - |
| APOE | rs769449 | Triglycerides | Age | 1.000 | - |
| GGT1 | rs2003757 | Gamma glutamyltransferase | Age | 1.000 | + |
| GGT1 | rs2003757 | Gamma glutamyltransferase | Driving | 0.997 | + |
| GGT1 | rs2003757 | Gamma glutamyltransferase | Processed_meat | 1.000 | + |
| GGT1 | rs2003757 | Gamma glutamyltransferase | Bread | 1.000 | + |
| PNPLA3 | rs3747207 | Aspartate aminotransferase | Watching_TV | 0.997 | + |
| PNPLA3 | rs3747207 | Aspartate aminotransferase | Walking_pace | 1.000 | - |
| PNPLA3 | rs3747207 | Aspartate aminotransferase | Alcohol | 0.991 | + |
| PNPLA3 | rs3747207 | Alanine aminotransferase | Age | 0.974 | + |
| PNPLA3 | rs3747207 | Alanine aminotransferase | Smoking | 0.990 | + |

The table lists summary information for 61 SNP-environment interacting pairs (rows), gene name (1st column), lead SNP (2nd column), trait name (3rd column), interacting environmental factors (4th column), posterior inclusion probability (PIP) (5th column), and whether the direction of SNP main effect and GxE effect is same (6th column; + for same and – for opposite).

**Supplementary Table 13. Aggregated interacting environment (AIE) scores stratified analysis for significant GxE associations identified by fastGxE across 67 blood biomarkers.**

| Genomic region | Genes | Trait | Lead SNP | p1 | p2 | p3 | p4 | p5 | Wald p-value |
| --- | --- | --- | --- | --- | --- | --- | --- | --- | --- |
| 1:21893876-21901457 | ALPL | Alkaline phosphatase | rs3767145 | 9.84E-20 | 5.34E-45 | 2.34E-59 | 1.42E-69 | 7.64E-83 | 9.11E-15 |
| 1:65892888-66213043 | LEPROT | C-reactive protein | rs1938498 | 2.39E-52 | 1.05E-81 | 2.43E-100 | 4.11E-134 | 4.33E-163 | 5.23E-29 |
| 1:65892888-66213043 | LEPROT | C-reactive protein | rs55953331 | 2.91E-29 | 1.62E-46 | 1.15E-64 | 1.38E-81 | 1.29E-103 | 3.46E-21 |
| 1:65892888-66213043 | LEPROT | C-reactive protein | rs12409877 | 1.24E-18 | 2.19E-29 | 1.49E-38 | 3.35E-47 | 1.99E-85 | 5.70E-18 |
| 1:109814880-109822166 | CELSR2 | Apolipoprotein B | rs7528419 | 2.58E-59 | 1.51E-87 | 5.88E-119 | 5.10E-150 | 4.76E-189 | 1.01E-16 |
| 1:109814880-109822166 | CELSR2 | Cholesterol | rs7528419 | 7.98E-17 | 4.11E-23 | 9.25E-49 | 6.42E-70 | 1.15E-105 | 7.44E-19 |
| 1:109814880-109822166 | CELSR2 | LDL direct | rs7528419 | 3.41E-29 | 1.20E-34 | 1.47E-71 | 5.17E-105 | 6.31E-131 | 3.89E-19 |
| 1:159615532-159729047 | CRP | C-reactive protein | rs3091244 | 8.26E-56 | 1.35E-112 | 3.83E-111 | 3.11E-130 | 6.13E-156 | 4.90E-27 |
| 1:159615532-159729047 | CRP | C-reactive protein | rs11265263 | 6.33E-60 | 1.53E-75 | 1.61E-97 | 7.87E-100 | 1.90E-133 | 4.14E-19 |
| 2:31609942-33038262 | SRD5A2 | Testosterone | rs138529890 | 5.22E-02 | 1.51E-05 | 5.33E-17 | 2.13E-21 | 1.47E-30 | 8.98E-24 |
| 2:211292581-211898472 | CPS1 | Glycine | rs1047891 | 0.00E+00 | 0.00E+00 | 0.00E+00 | 0.00E+00 | 0.00E+00 | 0.00E+00 |
| 2:211292581-211898472 | CPS1 | Glycine | rs34132242 | 2.85E-50 | 6.54E-86 | 6.55E-124 | 1.07E-166 | 3.34E-187 | 1.33E-53 |
| 2:211292581-211898472 | CPS1 | Glycine | rs1990797 | 3.80E-58 | 3.14E-80 | 1.10E-119 | 2.13E-144 | 4.17E-183 | 3.82E-43 |
| 2:211292581-211898472 | CPS1 | Glycine | rs319737 | 6.33E-45 | 7.94E-66 | 1.15E-99 | 1.59E-130 | 1.58E-149 | 3.89E-40 |
| 2:211292581-211898472 | CPS1 | Glycine | rs72941885 | 3.86E-54 | 5.50E-85 | 1.15E-104 | 1.53E-135 | 3.49E-143 | 6.98E-31 |
| 2:211292581-211898472 | CPS1 | Glycine | rs111603337 | 2.85E-46 | 1.99E-70 | 1.39E-101 | 2.42E-119 | 3.73E-135 | 2.15E-31 |
| 2:211292581-211898472 | CPS1 | Glycine | rs4597454 | 1.56E-38 | 2.82E-61 | 2.19E-76 | 6.42E-106 | 1.06E-121 | 6.92E-30 |
| 2:211292581-211898472 | CPS1 | Glycine | rs34601425 | 2.63E-24 | 1.65E-57 | 1.04E-72 | 6.60E-82 | 9.15E-102 | 2.31E-26 |
| 2:211292581-211898472 | CPS1 | Glycine | rs12694211 | 3.25E-27 | 2.56E-62 | 7.46E-83 | 2.38E-83 | 1.11E-111 | 1.44E-29 |
| 2:211292581-211898472 | CPS1 | Glycine | rs79639185 | 2.27E-31 | 1.15E-69 | 2.37E-65 | 1.14E-92 | 8.34E-112 | 1.05E-24 |
| 2:211292581-211898472 | CPS1 | Glycine | rs62203749 | 3.68E-30 | 8.43E-45 | 2.77E-66 | 4.50E-75 | 1.03E-88 | 6.07E-21 |
| 2:211292581-211898472 | CPS1 | Glycine | rs116277319 | 3.24E-13 | 3.09E-35 | 7.90E-43 | 4.12E-50 | 4.19E-62 | 2.13E-17 |
| 2:211292581-211898472 | CPS1 | Glycine | rs13401425 | 3.78E-36 | 6.24E-57 | 9.90E-85 | 3.06E-74 | 5.81E-100 | 2.34E-20 |
| 2:211292581-211898472 | CPS1 | Glycine | rs62201973 | 6.08E-14 | 5.40E-31 | 2.95E-40 | 9.92E-48 | 2.64E-68 | 1.19E-18 |
| 2:211292581-211898472 | CPS1 | Glycine | rs114338044 | 4.48E-24 | 3.04E-47 | 2.82E-42 | 5.12E-55 | 3.93E-81 | 2.42E-15 |
| 2:234504098-234698976 | UGT1A1 | Direct bilirubin | rs887829 | 0.00E+00 | 0.00E+00 | 0.00E+00 | 0.00E+00 | 0.00E+00 | 6.82E-73 |
| 2:234504098-234698976 | UGT1A1 | Total bilirubin | rs887829 | 0.00E+00 | 0.00E+00 | 0.00E+00 | 0.00E+00 | 0.00E+00 | 1.01E-40 |
| 3:56849749-56865776 | ARHGEF3 | Platelet distribution width | rs1354034 | 1.88E-11 | 1.23E-01 | 3.58E-01 | 3.89E-05 | 3.72E-12 | 5.37E-23 |
| 4:9760490-10416360 | SLC2A9 | Urate | rs7696983 | 0.00E+00 | 0.00E+00 | 0.00E+00 | 0.00E+00 | 0.00E+00 | 2.01E-76 |
| 4:9760490-10416360 | SLC2A9 | Urate | rs10939663 | 3.68E-85 | 5.25E-162 | 2.28E-196 | 2.13E-262 | 0.00E+00 | 4.03E-33 |
| 4:9760490-10416360 | SLC2A9 | Urate | rs4697948 | 4.32E-07 | 3.85E-28 | 5.45E-40 | 7.65E-59 | 4.49E-82 | 1.03E-21 |
| 4:9760490-10416360 | SLC2A9 | Urate | rs4461524 | 1.18E-14 | 6.79E-43 | 1.14E-50 | 6.74E-71 | 1.24E-101 | 4.14E-18 |
| 4:9760490-10416360 | SLC2A9 | Urate | rs6847871 | 1.57E-35 | 3.36E-60 | 1.23E-78 | 1.73E-101 | 1.59E-151 | 7.87E-20 |
| 4:9760490-10416360 | SLC2A9 | Urate | rs1007872 | 7.14E-03 | 7.43E-06 | 1.49E-13 | 4.78E-21 | 5.71E-43 | 1.28E-13 |
| 6:25616453-26123502 | HFE | Red blood cell distribution width | rs80215559 | 1.50E-37 | 6.87E-55 | 8.24E-75 | 9.70E-68 | 2.88E-113 | 1.34E-11 |
| 6:160265593-161443939 | LPA | Lipoprotein A | rs6938647 | 0.00E+00 | 0.00E+00 | 0.00E+00 | 0.00E+00 | 0.00E+00 | 2.66E-36 |
| 6:160265593-161443939 | LPA | Lipoprotein A | rs3778217 | 1.08E-21 | 1.25E-41 | 3.22E-56 | 3.27E-64 | 8.35E-89 | 1.60E-16 |
| 6:160265593-161443939 | LPA | Lipoprotein A | rs1510224 | 3.27E-28 | 1.48E-44 | 2.60E-63 | 5.75E-122 | 1.16E-177 | 6.51E-25 |
| 6:160265593-161443939 | LPA | Lipoprotein A | rs118039278 | 0.00E+00 | 0.00E+00 | 0.00E+00 | 0.00E+00 | 0.00E+00 | 4.08E-24 |
| 6:160265593-161443939 | LPA | Lipoprotein A | rs113572208 | 1.07E-11 | 1.39E-01 | 5.25E-01 | 3.22E-02 | 1.77E-07 | 1.44E-16 |
| 9:136132908-136155000 | ABO | Alkaline phosphatase | rs550057 | 0.00E+00 | 0.00E+00 | 0.00E+00 | 0.00E+00 | 0.00E+00 | 1.23E-23 |
| 10:64822828-65400352 | JMJD1C | Testosterone | rs9414801 | 3.43E-13 | 1.74E-16 | 2.84E-31 | 1.22E-61 | 5.75E-72 | 6.76E-45 |
| 10:114749734-114818754 | TCF7L2 | Glycated haemoglobin (HbA1c) | rs7903146 | 2.97E-13 | 2.56E-13 | 5.75E-27 | 7.69E-39 | 1.38E-54 | 3.38E-13 |
| 11:14579376-14934686 | CYP2R1 | Vitamin D | rs116970203 | 9.79E-47 | 1.34E-88 | 1.57E-106 | 4.77E-137 | 7.65E-189 | 6.93E-21 |
| 11:14579376-14934686 | CYP2R1 | Vitamin D | rs10766194 | 6.59E-32 | 1.42E-58 | 2.31E-61 | 7.01E-104 | 1.04E-135 | 1.00E-17 |
| 11:116623213-116657561 | BUD13 | LDL direct | rs964184 | 1.78E-01 | 9.99E-07 | 4.86E-09 | 1.04E-25 | 2.26E-48 | 3.12E-18 |
| 12:2908330-2977954 | FKBP4 | Testosterone | rs56196860 | 3.56E-04 | 4.47E-16 | 4.70E-28 | 1.47E-33 | 7.56E-58 | 1.57E-39 |
| 12:121384495-121484936 | HNF1A | C-reactive protein | rs2244608 | 8.54E-76 | 5.63E-87 | 7.76E-104 | 1.91E-112 | 2.98E-133 | 2.38E-13 |
| 14:94838142-94844947 | SERPINA1 | Testosterone | rs28929474 | 3.19E-01 | 6.05E-05 | 8.33E-07 | 4.98E-14 | 3.90E-25 | 2.05E-15 |
| 16:20350459-20407196 | UMOD | Urea | rs9928757 | 2.59E-01 | 1.42E-01 | 2.04E-02 | 3.52E-08 | 1.54E-16 | 1.16E-11 |
| 16:20350459-20407196 | UMOD | Creatinine | rs28640218 | 5.84E-05 | 3.84E-10 | 6.11E-24 | 2.27E-40 | 1.89E-54 | 1.61E-24 |
| 16:20350459-20407196 | UMOD | Cystatin C | rs13333226 | 2.17E-03 | 2.15E-04 | 8.46E-13 | 3.24E-28 | 4.35E-44 | 7.94E-23 |
| 17:7310006-7651906 | NLGN2 | SHBG | rs115126578 | 4.18E-102 | 3.88E-108 | 4.14E-154 | 2.35E-150 | 1.17E-168 | 2.89E-22 |
| 17:7310006-7651906 | NLGN2 | SHBG | rs858519 | 2.82E-263 | 7.47E-284 | 5.60E-303 | 1.81E-298 | 1.8025e-313 | 4.50E-15 |
| 17:7310006-7651906 | NLGN2 | Testosterone | rs62059839 | 1.17E-27 | 3.04E-56 | 4.72E-82 | 4.36E-128 | 1.42E-169 | 1.36E-105 |
| 17:7310006-7651906 | NLGN2 | Testosterone | rs9892862 | 3.32E-13 | 2.90E-36 | 9.43E-62 | 8.16E-85 | 5.62E-118 | 1.74E-81 |
| 17:7310006-7651906 | NLGN2 | Testosterone | rs1042522 | 7.87E-10 | 1.47E-26 | 1.73E-40 | 7.07E-54 | 7.82E-82 | 1.36E-50 |
| 17:7310006-7651906 | NLGN2 | Testosterone | rs12944954 | 2.92E-07 | 2.94E-22 | 9.59E-23 | 1.19E-43 | 7.03E-67 | 1.56E-39 |
| 17:7310006-7651906 | NLGN2 | Testosterone | rs3174744 | 3.58E-09 | 2.74E-12 | 4.46E-21 | 5.10E-42 | 3.48E-40 | 8.99E-25 |
| 17:7310006-7651906 | NLGN2 | Testosterone | rs117387630 | 1.11E-01 | 5.47E-04 | 1.47E-10 | 1.39E-09 | 1.13E-29 | 2.52E-17 |
| 17:7310006-7651906 | NLGN2 | Testosterone | rs113924794 | 9.57E-06 | 1.40E-03 | 5.74E-13 | 8.25E-16 | 5.79E-32 | 1.03E-16 |
| 17:7310006-7651906 | NLGN2 | Testosterone | rs55662831 | 3.25E-04 | 3.54E-10 | 3.23E-13 | 8.67E-27 | 5.32E-31 | 1.27E-17 |
| 19:11185919-11210912 | LDLR | Apolipoprotein B | rs73015024 | 8.50E-38 | 2.78E-70 | 1.04E-97 | 1.69E-131 | 1.14E-157 | 8.26E-18 |
| 19:11185919-11210912 | LDLR | Cholesterol | rs73015024 | 1.79E-29 | 3.90E-57 | 5.70E-89 | 7.63E-125 | 4.41E-159 | 2.74E-19 |
| 19:11185919-11210912 | LDLR | LDL direct | rs73015024 | 8.79E-37 | 7.33E-64 | 2.17E-109 | 1.86E-140 | 2.80E-187 | 2.96E-22 |
| 19:19325963-19793545 | NCAN | Apolipoprotein B | rs8107974 | 4.86E-02 | 8.76E-09 | 5.76E-20 | 2.52E-34 | 1.76E-56 | 2.28E-23 |
| 19:19325963-19793545 | NCAN | Aspartate aminotransferase | rs8107974 | 3.64E-01 | 1.40E-02 | 7.79E-11 | 3.22E-16 | 5.55E-19 | 4.66E-11 |
| 19:19325963-19793545 | NCAN | Cholesterol | rs58542926 | 1.32E-07 | 2.04E-17 | 8.42E-32 | 3.39E-44 | 5.52E-67 | 2.77E-17 |
| 19:19325963-19793545 | NCAN | LDL direct | rs58542926 | 8.17E-05 | 2.12E-13 | 1.24E-27 | 2.09E-40 | 9.37E-61 | 3.93E-18 |
| 19:45232161-45427125 | APOE | Apolipoprotein B | rs429358 | 2.63E-134 | 6.27E-204 | 3.22E-273 | 0.00E+00 | 0.00E+00 | 1.55E-22 |
| 19:45232161-45427125 | APOE | Apolipoprotein B | rs7412 | 0.00E+00 | 0.00E+00 | 0.00E+00 | 0.00E+00 | 0.00E+00 | 1.01E-24 |
| 19:45232161-45427125 | APOE | Cholesterol | rs7412 | 7.42E-121 | 1.45E-235 | 2.3814e-319 | 0.00E+00 | 0.00E+00 | 1.83E-43 |
| 19:45232161-45427125 | APOE | Cholesterol | rs429358 | 1.83E-32 | 2.71E-84 | 1.57E-108 | 6.09E-168 | 1.47E-212 | 6.62E-29 |
| 19:45232161-45427125 | APOE | C-reactive protein | rs429358 | 2.59E-164 | 1.47E-208 | 2.55E-201 | 3.81E-237 | 1.44E-282 | 1.45E-28 |
| 19:45232161-45427125 | APOE | LDL direct | rs7412 | 2.40E-251 | 0.00E+00 | 0.00E+00 | 0.00E+00 | 0.00E+00 | 6.69E-48 |
| 19:45232161-45427125 | APOE | LDL direct | rs429358 | 1.55E-49 | 4.25E-110 | 4.44E-138 | 1.11E-207 | 3.76E-292 | 1.08E-35 |
| 19:45232161-45427125 | APOE | Triglycerides | rs769449 | 3.05E-02 | 1.07E-05 | 8.05E-06 | 1.59E-15 | 7.46E-33 | 6.88E-12 |
| 22:24986145-25004608 | GGT1 | Gamma glutamyltransferase | rs2003757 | 6.80E-182 | 4.77E-271 | 1.72E-299 | 0.00E+00 | 0.00E+00 | 1.66E-55 |
| 22:44324727-44395451 | PNPLA3 | Alanine aminotransferase | rs3747207 | 3.02E-12 | 1.66E-28 | 1.56E-37 | 3.93E-52 | 8.55E-78 | 5.95E-16 |
| 22:44324727-44395451 | PNPLA3 | Aspartate aminotransferase | rs3747207 | 1.77E-12 | 4.30E-28 | 7.48E-50 | 5.04E-60 | 1.30E-87 | 3.92E-25 |

The table lists summary information for the AIE stratified analysis, including genomic region (1st column), gene (2nd column), trait name (3rd column), lead SNP (4th column), *p*-values of SNP main effects for five AIE quintile groups (5-9th column), and stratified Wald *p*-value (10th column).

**Supplementary Table 14. The table summarizes eQTL annotation results of the lead SNPs in significant GxE regions for 67 blood biomarkers.**

| rsID | Chr. | base | Tissue | Gene | p |
| --- | --- | --- | --- | --- | --- |
| rs3767145 | 1 | 21895802 | Liver | *ALPL* | 3.52E-06 |
| rs12409877 | 1 | 65943872 | Adipose_Subcutaneous | *LEPR* | 4.58E-05 |
| rs12409877 | 1 | 65943872 | Adipose_Visceral_Omentum | *LEPR* | 1.28E-05 |
| rs12409877 | 1 | 65943872 | Brain_Cerebellar_Hemisphere | *LEPR* | 3.51E-05 |
| rs12409877 | 1 | 65943872 | Esophagus_Muscularis | *RP4-535B20.1* | 1.06E-04 |
| rs12409877 | 1 | 65943872 | Skin_Sun_Exposed_Lower_leg | *LEPR* | 1.97E-04 |
| rs12409877 | 1 | 65943872 | Testis | *LEPR* | 1.05E-05 |
| rs1938498 | 1 | 66098653 | Pancreas | *LEPROT* | 6.30E-05 |
| rs55953331 | 1 | 66150510 | Breast_Mammary_Tissue | *LEPR* | 2.21E-05 |
| rs7528419 | 1 | 109817192 | Adipose_Subcutaneous | *PSRC1* | 1.19E-06 |
| rs7528419 | 1 | 109817192 | Adipose_Visceral_Omentum | *PSRC1* | 2.06E-06 |
| rs7528419 | 1 | 109817192 | Whole_Blood | *PSRC1* | 1.05E-15 |
| rs7528419 | 1 | 109817192 | Brain_Cortex | *PSRC1* | 6.18E-09 |
| rs7528419 | 1 | 109817192 | Brain_Putamen_basal_ganglia | *PSRC1* | 3.02E-05 |
| rs7528419 | 1 | 109817192 | Breast_Mammary_Tissue | *PSRC1* | 3.98E-07 |
| rs7528419 | 1 | 109817192 | Colon_Sigmoid | *PSRC1* | 5.64E-06 |
| rs7528419 | 1 | 109817192 | Colon_Transverse | *PSRC1* | 5.90E-05 |
| rs7528419 | 1 | 109817192 | Esophagus_Gastroesophageal_Junction | *PSRC1* | 7.80E-05 |
| rs7528419 | 1 | 109817192 | Esophagus_Mucosa | *PSRC1* | 9.95E-25 |
| rs7528419 | 1 | 109817192 | Esophagus_Mucosa | *SORT1* | 2.41E-10 |
| rs7528419 | 1 | 109817192 | Esophagus_Mucosa | *CELSR2* | 2.86E-16 |
| rs7528419 | 1 | 109817192 | Heart_Left_Ventricle | *PSRC1* | 4.07E-07 |
| rs7528419 | 1 | 109817192 | Liver | *PSRC1* | 2.39E-35 |
| rs7528419 | 1 | 109817192 | Liver | *SORT1* | 3.14E-49 |
| rs7528419 | 1 | 109817192 | Liver | *SYPL2* | 6.47E-07 |
| rs7528419 | 1 | 109817192 | Liver | *CELSR2* | 1.01E-32 |
| rs7528419 | 1 | 109817192 | Liver | *ATXN7L2* | 5.83E-07 |
| rs7528419 | 1 | 109817192 | Muscle_Skeletal | *SARS* | 2.01E-04 |
| rs7528419 | 1 | 109817192 | Muscle_Skeletal | *PSRC1* | 8.71E-13 |
| rs7528419 | 1 | 109817192 | Muscle_Skeletal | *CELSR2* | 2.23E-76 |
| rs7528419 | 1 | 109817192 | Nerve_Tibial | *PSRC1* | 9.36E-09 |
| rs7528419 | 1 | 109817192 | Pancreas | *PSRC1* | 1.29E-13 |
| rs7528419 | 1 | 109817192 | Pancreas | *CELSR2* | 2.70E-13 |
| rs7528419 | 1 | 109817192 | Pituitary | *PSRC1* | 1.60E-07 |
| rs7528419 | 1 | 109817192 | Prostate | *PSRC1* | 1.87E-05 |
| rs7528419 | 1 | 109817192 | Minor_Salivary_Gland | *PSRC1* | 1.48E-08 |
| rs7528419 | 1 | 109817192 | Minor_Salivary_Gland | *SORT1* | 6.40E-06 |
| rs7528419 | 1 | 109817192 | Minor_Salivary_Gland | *CELSR2* | 2.14E-07 |
| rs7528419 | 1 | 109817192 | Cells_Cultured_fibroblasts | *PSRC1* | 2.57E-08 |
| rs7528419 | 1 | 109817192 | Skin_Not_Sun_Exposed_Suprapubic | *PSRC1* | 3.41E-12 |
| rs7528419 | 1 | 109817192 | Skin_Not_Sun_Exposed_Suprapubic | *CELSR2* | 9.80E-06 |
| rs7528419 | 1 | 109817192 | Skin_Not_Sun_Exposed_Suprapubic | *GSTM4* | 9.22E-05 |
| rs7528419 | 1 | 109817192 | Skin_Sun_Exposed_Lower_leg | *PSRC1* | 3.83E-07 |
| rs7528419 | 1 | 109817192 | Skin_Sun_Exposed_Lower_leg | *SORT1* | 1.61E-05 |
| rs7528419 | 1 | 109817192 | Skin_Sun_Exposed_Lower_leg | *CELSR2* | 3.77E-11 |
| rs7528419 | 1 | 109817192 | Skin_Sun_Exposed_Lower_leg | *GSTM4* | 2.20E-05 |
| rs7528419 | 1 | 109817192 | Stomach | *PSRC1* | 9.43E-06 |
| rs7528419 | 1 | 109817192 | Testis | *PSRC1* | 5.44E-12 |
| rs7528419 | 1 | 109817192 | Thyroid | *PSRC1* | 8.84E-07 |
| rs7528419 | 1 | 109817192 | Adipose_Subcutaneous | *PSRC1* | 1.19E-06 |
| rs7528419 | 1 | 109817192 | Adipose_Visceral_Omentum | *PSRC1* | 2.06E-06 |
| rs7528419 | 1 | 109817192 | Whole_Blood | *PSRC1* | 1.05E-15 |
| rs7528419 | 1 | 109817192 | Brain_Cortex | *PSRC1* | 6.18E-09 |
| rs7528419 | 1 | 109817192 | Brain_Putamen_basal_ganglia | *PSRC1* | 3.02E-05 |
| rs7528419 | 1 | 109817192 | Breast_Mammary_Tissue | *PSRC1* | 3.98E-07 |
| rs7528419 | 1 | 109817192 | Colon_Sigmoid | *PSRC1* | 5.64E-06 |
| rs7528419 | 1 | 109817192 | Colon_Transverse | *PSRC1* | 5.90E-05 |
| rs7528419 | 1 | 109817192 | Esophagus_Gastroesophageal_Junction | *PSRC1* | 7.80E-05 |
| rs7528419 | 1 | 109817192 | Esophagus_Mucosa | *PSRC1* | 9.95E-25 |
| rs7528419 | 1 | 109817192 | Esophagus_Mucosa | *SORT1* | 2.41E-10 |
| rs7528419 | 1 | 109817192 | Esophagus_Mucosa | *CELSR2* | 2.86E-16 |
| rs7528419 | 1 | 109817192 | Heart_Left_Ventricle | *PSRC1* | 4.07E-07 |
| rs7528419 | 1 | 109817192 | Liver | *PSRC1* | 2.39E-35 |
| rs7528419 | 1 | 109817192 | Liver | *SORT1* | 3.14E-49 |
| rs7528419 | 1 | 109817192 | Liver | *SYPL2* | 6.47E-07 |
| rs7528419 | 1 | 109817192 | Liver | *CELSR2* | 1.01E-32 |
| rs7528419 | 1 | 109817192 | Liver | *ATXN7L2* | 5.83E-07 |
| rs7528419 | 1 | 109817192 | Muscle_Skeletal | *SARS* | 2.01E-04 |
| rs7528419 | 1 | 109817192 | Muscle_Skeletal | *PSRC1* | 8.71E-13 |
| rs7528419 | 1 | 109817192 | Muscle_Skeletal | *CELSR2* | 2.23E-76 |
| rs7528419 | 1 | 109817192 | Nerve_Tibial | *PSRC1* | 9.36E-09 |
| rs7528419 | 1 | 109817192 | Pancreas | *PSRC1* | 1.29E-13 |
| rs7528419 | 1 | 109817192 | Pancreas | *CELSR2* | 2.70E-13 |
| rs7528419 | 1 | 109817192 | Pituitary | *PSRC1* | 1.60E-07 |
| rs7528419 | 1 | 109817192 | Prostate | *PSRC1* | 1.87E-05 |
| rs7528419 | 1 | 109817192 | Minor_Salivary_Gland | *PSRC1* | 1.48E-08 |
| rs7528419 | 1 | 109817192 | Minor_Salivary_Gland | *SORT1* | 6.40E-06 |
| rs7528419 | 1 | 109817192 | Minor_Salivary_Gland | *CELSR2* | 2.14E-07 |
| rs7528419 | 1 | 109817192 | Cells_Cultured_fibroblasts | *PSRC1* | 2.57E-08 |
| rs7528419 | 1 | 109817192 | Skin_Not_Sun_Exposed_Suprapubic | *PSRC1* | 3.41E-12 |
| rs7528419 | 1 | 109817192 | Skin_Not_Sun_Exposed_Suprapubic | *CELSR2* | 9.80E-06 |
| rs7528419 | 1 | 109817192 | Skin_Not_Sun_Exposed_Suprapubic | *GSTM4* | 9.22E-05 |
| rs7528419 | 1 | 109817192 | Skin_Sun_Exposed_Lower_leg | *PSRC1* | 3.83E-07 |
| rs7528419 | 1 | 109817192 | Skin_Sun_Exposed_Lower_leg | *SORT1* | 1.61E-05 |
| rs7528419 | 1 | 109817192 | Skin_Sun_Exposed_Lower_leg | *CELSR2* | 3.77E-11 |
| rs7528419 | 1 | 109817192 | Skin_Sun_Exposed_Lower_leg | *GSTM4* | 2.20E-05 |
| rs7528419 | 1 | 109817192 | Stomach | *PSRC1* | 9.43E-06 |
| rs7528419 | 1 | 109817192 | Testis | *PSRC1* | 5.44E-12 |
| rs7528419 | 1 | 109817192 | Thyroid | *PSRC1* | 8.84E-07 |
| rs7528419 | 1 | 109817192 | Adipose_Subcutaneous | *PSRC1* | 1.19E-06 |
| rs7528419 | 1 | 109817192 | Adipose_Visceral_Omentum | *PSRC1* | 2.06E-06 |
| rs7528419 | 1 | 109817192 | Whole_Blood | *PSRC1* | 1.05E-15 |
| rs7528419 | 1 | 109817192 | Brain_Cortex | *PSRC1* | 6.18E-09 |
| rs7528419 | 1 | 109817192 | Brain_Putamen_basal_ganglia | *PSRC1* | 3.02E-05 |
| rs7528419 | 1 | 109817192 | Breast_Mammary_Tissue | *PSRC1* | 3.98E-07 |
| rs7528419 | 1 | 109817192 | Colon_Sigmoid | *PSRC1* | 5.64E-06 |
| rs7528419 | 1 | 109817192 | Colon_Transverse | *PSRC1* | 5.90E-05 |
| rs7528419 | 1 | 109817192 | Esophagus_Gastroesophageal_Junction | *PSRC1* | 7.80E-05 |
| rs7528419 | 1 | 109817192 | Esophagus_Mucosa | *PSRC1* | 9.95E-25 |
| rs7528419 | 1 | 109817192 | Esophagus_Mucosa | *SORT1* | 2.41E-10 |
| rs7528419 | 1 | 109817192 | Esophagus_Mucosa | *CELSR2* | 2.86E-16 |
| rs7528419 | 1 | 109817192 | Heart_Left_Ventricle | *PSRC1* | 4.07E-07 |
| rs7528419 | 1 | 109817192 | Liver | *PSRC1* | 2.39E-35 |
| rs7528419 | 1 | 109817192 | Liver | *SORT1* | 3.14E-49 |
| rs7528419 | 1 | 109817192 | Liver | *SYPL2* | 6.47E-07 |
| rs7528419 | 1 | 109817192 | Liver | *CELSR2* | 1.01E-32 |
| rs7528419 | 1 | 109817192 | Liver | *ATXN7L2* | 5.83E-07 |
| rs7528419 | 1 | 109817192 | Muscle_Skeletal | *SARS* | 2.01E-04 |
| rs7528419 | 1 | 109817192 | Muscle_Skeletal | *PSRC1* | 8.71E-13 |
| rs7528419 | 1 | 109817192 | Muscle_Skeletal | *CELSR2* | 2.23E-76 |
| rs7528419 | 1 | 109817192 | Nerve_Tibial | *PSRC1* | 9.36E-09 |
| rs7528419 | 1 | 109817192 | Pancreas | *PSRC1* | 1.29E-13 |
| rs7528419 | 1 | 109817192 | Pancreas | *CELSR2* | 2.70E-13 |
| rs7528419 | 1 | 109817192 | Pituitary | *PSRC1* | 1.60E-07 |
| rs7528419 | 1 | 109817192 | Prostate | *PSRC1* | 1.87E-05 |
| rs7528419 | 1 | 109817192 | Minor_Salivary_Gland | *PSRC1* | 1.48E-08 |
| rs7528419 | 1 | 109817192 | Minor_Salivary_Gland | *SORT1* | 6.40E-06 |
| rs7528419 | 1 | 109817192 | Minor_Salivary_Gland | *CELSR2* | 2.14E-07 |
| rs7528419 | 1 | 109817192 | Cells_Cultured_fibroblasts | *PSRC1* | 2.57E-08 |
| rs7528419 | 1 | 109817192 | Skin_Not_Sun_Exposed_Suprapubic | *PSRC1* | 3.41E-12 |
| rs7528419 | 1 | 109817192 | Skin_Not_Sun_Exposed_Suprapubic | *CELSR2* | 9.80E-06 |
| rs7528419 | 1 | 109817192 | Skin_Not_Sun_Exposed_Suprapubic | *GSTM4* | 9.22E-05 |
| rs7528419 | 1 | 109817192 | Skin_Sun_Exposed_Lower_leg | *PSRC1* | 3.83E-07 |
| rs7528419 | 1 | 109817192 | Skin_Sun_Exposed_Lower_leg | *SORT1* | 1.61E-05 |
| rs7528419 | 1 | 109817192 | Skin_Sun_Exposed_Lower_leg | *CELSR2* | 3.77E-11 |
| rs7528419 | 1 | 109817192 | Skin_Sun_Exposed_Lower_leg | *GSTM4* | 2.20E-05 |
| rs7528419 | 1 | 109817192 | Stomach | *PSRC1* | 9.43E-06 |
| rs7528419 | 1 | 109817192 | Testis | *PSRC1* | 5.44E-12 |
| rs7528419 | 1 | 109817192 | Thyroid | *PSRC1* | 8.84E-07 |
| rs13401425 | 2 | 211501601 | Adipose_Subcutaneous | *CPS1* | 1.31E-04 |
| rs13401425 | 2 | 211501601 | Artery_Tibial | *LANCL1* | 1.89E-04 |
| rs13401425 | 2 | 211501601 | Brain_Cortex | *LANCL1* | 9.07E-05 |
| rs111603337 | 2 | 211735764 | Cells_Cultured_fibroblasts | *CPS1* | 1.43E-04 |
| rs887829 | 2 | 234668570 | Esophagus_Mucosa | *UGT1A6* | 1.34E-12 |
| rs887829 | 2 | 234668570 | Esophagus_Mucosa | *UGT1A9* | 5.15E-05 |
| rs887829 | 2 | 234668570 | Esophagus_Mucosa | *UGT1A7* | 3.57E-06 |
| rs887829 | 2 | 234668570 | Liver | *RPL17P11* | 1.07E-14 |
| rs887829 | 2 | 234668570 | Liver | *UGT1A8* | 6.31E-08 |
| rs887829 | 2 | 234668570 | Liver | *UGT1A3* | 3.81E-14 |
| rs887829 | 2 | 234668570 | Skin_Not_Sun_Exposed_Suprapubic | *USP40* | 1.13E-04 |
| rs887829 | 2 | 234668570 | Skin_Not_Sun_Exposed_Suprapubic | *AC114812.8* | 8.02E-11 |
| rs887829 | 2 | 234668570 | Esophagus_Mucosa | *UGT1A6* | 1.34E-12 |
| rs887829 | 2 | 234668570 | Esophagus_Mucosa | *UGT1A9* | 5.15E-05 |
| rs887829 | 2 | 234668570 | Esophagus_Mucosa | *UGT1A7* | 3.57E-06 |
| rs887829 | 2 | 234668570 | Liver | *RPL17P11* | 1.07E-14 |
| rs887829 | 2 | 234668570 | Liver | *UGT1A8* | 6.31E-08 |
| rs887829 | 2 | 234668570 | Liver | *UGT1A3* | 3.81E-14 |
| rs887829 | 2 | 234668570 | Skin_Not_Sun_Exposed_Suprapubic | *USP40* | 1.13E-04 |
| rs887829 | 2 | 234668570 | Skin_Not_Sun_Exposed_Suprapubic | *AC114812.8* | 8.02E-11 |
| rs887829 | 2 | 234668570 | Liver | *UGT1A1* | 8.70E-10 |
| rs6847871 | 4 | 9853074 | Lung | *SLC2A9* | 5.71E-07 |
| rs1007872 | 4 | 9945148 | Adipose_Subcutaneous | *SLC2A9* | 3.16E-05 |
| rs1007872 | 4 | 9945148 | Adipose_Subcutaneous | *RP11-448G15.3* | 2.00E-08 |
| rs1007872 | 4 | 9945148 | Adipose_Visceral_Omentum | *SLC2A9* | 6.83E-05 |
| rs1007872 | 4 | 9945148 | Cells_EBV-transformed_lymphocytes | *RP11-448G15.1* | 1.02E-05 |
| rs1007872 | 4 | 9945148 | Whole_Blood | *RP11-448G15.3* | 1.83E-07 |
| rs1007872 | 4 | 9945148 | Artery_Aorta | *SLC2A9* | 5.52E-08 |
| rs1007872 | 4 | 9945148 | Artery_Tibial | *SLC2A9* | 2.82E-08 |
| rs1007872 | 4 | 9945148 | Artery_Tibial | *ZNF518B* | 5.84E-05 |
| rs1007872 | 4 | 9945148 | Artery_Tibial | *RP11-448G15.3* | 4.32E-07 |
| rs1007872 | 4 | 9945148 | Esophagus_Muscularis | *SLC2A9* | 7.64E-06 |
| rs1007872 | 4 | 9945148 | Muscle_Skeletal | *ZNF518B* | 1.24E-05 |
| rs1007872 | 4 | 9945148 | Nerve_Tibial | *SLC2A9* | 7.49E-09 |
| rs1007872 | 4 | 9945148 | Nerve_Tibial | *RP11-448G15.3* | 4.59E-15 |
| rs1007872 | 4 | 9945148 | Cells_Cultured_fibroblasts | *WDR1* | 5.68E-05 |
| rs1007872 | 4 | 9945148 | Skin_Sun_Exposed_Lower_leg | *RP11-448G15.3* | 2.66E-04 |
| rs1007872 | 4 | 9945148 | Small_Intestine_Terminal_Ileum | *SLC2A9* | 5.14E-05 |
| rs1007872 | 4 | 9945148 | Thyroid | *SLC2A9* | 8.37E-07 |
| rs1007872 | 4 | 9945148 | Thyroid | *RP11-448G15.3* | 1.15E-05 |
| rs7696983 | 4 | 9995829 | Artery_Tibial | *SLC2A9* | 1.94E-04 |
| rs7696983 | 4 | 9995829 | Muscle_Skeletal | *SLC2A9* | 5.36E-06 |
| rs7696983 | 4 | 9995829 | Nerve_Tibial | *RP11-448G15.3* | 1.28E-04 |
| rs7696983 | 4 | 9995829 | Cells_Cultured_fibroblasts | *WDR1* | 3.31E-04 |
| rs10939663 | 4 | 10032516 | Adipose_Subcutaneous | *SLC2A9* | 5.22E-12 |
| rs10939663 | 4 | 10032516 | Adipose_Subcutaneous | *RP11-448G15.3* | 1.93E-14 |
| rs10939663 | 4 | 10032516 | Adipose_Visceral_Omentum | *RP11-448G15.3* | 3.87E-12 |
| rs10939663 | 4 | 10032516 | Whole_Blood | *SLC2A9* | 3.50E-18 |
| rs10939663 | 4 | 10032516 | Whole_Blood | *RP11-448G15.3* | 2.13E-05 |
| rs10939663 | 4 | 10032516 | Artery_Aorta | *SLC2A9* | 9.42E-10 |
| rs10939663 | 4 | 10032516 | Artery_Aorta | *RP11-448G15.3* | 4.92E-14 |
| rs10939663 | 4 | 10032516 | Artery_Coronary | *SLC2A9* | 9.04E-06 |
| rs10939663 | 4 | 10032516 | Artery_Coronary | *RP11-448G15.3* | 4.75E-06 |
| rs10939663 | 4 | 10032516 | Artery_Tibial | *SLC2A9* | 9.96E-37 |
| rs10939663 | 4 | 10032516 | Artery_Tibial | *ZNF518B* | 4.57E-09 |
| rs10939663 | 4 | 10032516 | Artery_Tibial | *RP11-448G15.3* | 1.12E-15 |
| rs10939663 | 4 | 10032516 | Brain_Cerebellar_Hemisphere | *RP11-448G15.3* | 2.33E-07 |
| rs10939663 | 4 | 10032516 | Breast_Mammary_Tissue | *RP11-448G15.3* | 1.09E-11 |
| rs10939663 | 4 | 10032516 | Colon_Sigmoid | *SLC2A9* | 1.23E-20 |
| rs10939663 | 4 | 10032516 | Colon_Sigmoid | *RP11-448G15.3* | 4.53E-06 |
| rs10939663 | 4 | 10032516 | Colon_Transverse | *SLC2A9* | 8.56E-08 |
| rs10939663 | 4 | 10032516 | Colon_Transverse | *RP11-448G15.3* | 3.17E-08 |
| rs10939663 | 4 | 10032516 | Esophagus_Gastroesophageal_Junction | *SLC2A9* | 3.81E-13 |
| rs10939663 | 4 | 10032516 | Esophagus_Mucosa | *RP11-448G15.3* | 9.07E-07 |
| rs10939663 | 4 | 10032516 | Esophagus_Muscularis | *SLC2A9* | 1.79E-35 |
| rs10939663 | 4 | 10032516 | Esophagus_Muscularis | *ZNF518B* | 1.26E-04 |
| rs10939663 | 4 | 10032516 | Esophagus_Muscularis | *RP11-448G15.3* | 3.51E-07 |
| rs10939663 | 4 | 10032516 | Heart_Atrial_Appendage | *RP11-448G15.3* | 2.31E-06 |
| rs10939663 | 4 | 10032516 | Lung | *RP11-448G15.3* | 7.32E-05 |
| rs10939663 | 4 | 10032516 | Muscle_Skeletal | *SLC2A9* | 3.12E-17 |
| rs10939663 | 4 | 10032516 | Nerve_Tibial | *WDR1* | 9.97E-09 |
| rs10939663 | 4 | 10032516 | Nerve_Tibial | *RP11-448G15.3* | 2.87E-32 |
| rs10939663 | 4 | 10032516 | Pancreas | *RP11-448G15.3* | 1.61E-06 |
| rs10939663 | 4 | 10032516 | Cells_Cultured_fibroblasts | *RP11-448G15.3* | 2.41E-07 |
| rs10939663 | 4 | 10032516 | Skin_Not_Sun_Exposed_Suprapubic | *WDR1* | 1.17E-05 |
| rs10939663 | 4 | 10032516 | Skin_Not_Sun_Exposed_Suprapubic | *RP11-448G15.3* | 2.04E-09 |
| rs10939663 | 4 | 10032516 | Skin_Sun_Exposed_Lower_leg | *WDR1* | 2.13E-05 |
| rs10939663 | 4 | 10032516 | Skin_Sun_Exposed_Lower_leg | *RP11-448G15.3* | 3.92E-11 |
| rs10939663 | 4 | 10032516 | Small_Intestine_Terminal_Ileum | *RP11-448G15.3* | 6.19E-07 |
| rs10939663 | 4 | 10032516 | Spleen | *SLC2A9* | 3.39E-07 |
| rs10939663 | 4 | 10032516 | Spleen | *RP11-448G15.3* | 4.14E-05 |
| rs10939663 | 4 | 10032516 | Stomach | *RP11-448G15.3* | 1.95E-06 |
| rs10939663 | 4 | 10032516 | Testis | *WDR1* | 3.30E-07 |
| rs10939663 | 4 | 10032516 | Testis | *RP11-448G15.3* | 2.76E-05 |
| rs10939663 | 4 | 10032516 | Thyroid | *RP11-448G15.3* | 2.09E-16 |
| rs10939663 | 4 | 10032516 | Uterus | *RP11-448G15.3* | 2.89E-05 |
| rs4461524 | 4 | 10074170 | Whole_Blood | *SLC2A9* | 1.31E-06 |
| rs4461524 | 4 | 10074170 | Colon_Sigmoid | *SLC2A9* | 3.62E-05 |
| rs4461524 | 4 | 10074170 | Esophagus_Muscularis | *SLC2A9* | 2.13E-07 |
| rs4461524 | 4 | 10074170 | Testis | *WDR1* | 1.80E-07 |
| rs4461524 | 4 | 10074170 | Thyroid | *SLC2A9* | 2.06E-04 |
| rs4697948 | 4 | 10171567 | Artery_Aorta | *WDR1* | 1.60E-04 |
| rs4697948 | 4 | 10171567 | Artery_Tibial | *WDR1* | 3.00E-08 |
| rs4697948 | 4 | 10171567 | Artery_Tibial | *ZNF518B* | 4.62E-05 |
| rs4697948 | 4 | 10171567 | Esophagus_Mucosa | *SLC2A9* | 4.78E-05 |
| rs4697948 | 4 | 10171567 | Cells_Cultured_fibroblasts | *WDR1* | 1.77E-04 |
| rs4697948 | 4 | 10171567 | Skin_Sun_Exposed_Lower_leg | *SLC2A9* | 9.00E-05 |
| rs4697948 | 4 | 10171567 | Testis | *WDR1* | 2.98E-09 |
| rs4697948 | 4 | 10171567 | Thyroid | *SLC2A9* | 3.10E-08 |
| rs1510224 | 6 | 160894878 | Whole_Blood | *SLC22A1* | 3.55E-06 |
| rs1510224 | 6 | 160894878 | Breast_Mammary_Tissue | *SLC22A1* | 1.77E-05 |
| rs1510224 | 6 | 160894878 | Liver | *LPA* | 4.65E-08 |
| rs1510224 | 6 | 160894878 | Lung | *SLC22A1* | 2.60E-07 |
| rs1510224 | 6 | 160894878 | Skin_Not_Sun_Exposed_Suprapubic | *SLC22A1* | 1.65E-05 |
| rs1510224 | 6 | 160894878 | Skin_Sun_Exposed_Lower_leg | *SLC22A1* | 8.29E-08 |
| rs118039278 | 6 | 160985526 | Nerve_Tibial | *SLC22A3* | 1.36E-04 |
| rs118039278 | 6 | 160985526 | Skin_Not_Sun_Exposed_Suprapubic | *SLC22A3* | 2.18E-05 |
| rs118039278 | 6 | 160985526 | Skin_Sun_Exposed_Lower_leg | *SLC22A3* | 2.98E-07 |
| rs118039278 | 6 | 160985526 | Testis | *LPA* | 5.83E-05 |
| rs6938647 | 6 | 160986915 | Esophagus_Mucosa | *SLC22A3* | 8.66E-06 |
| rs6938647 | 6 | 160986915 | Lung | *SLC22A3* | 1.22E-05 |
| rs6938647 | 6 | 160986915 | Skin_Not_Sun_Exposed_Suprapubic | *SLC22A3* | 4.75E-06 |
| rs6938647 | 6 | 160986915 | Skin_Sun_Exposed_Lower_leg | *SLC22A3* | 1.73E-06 |
| rs6938647 | 6 | 160986915 | Testis | *PLG* | 2.72E-07 |
| rs6938647 | 6 | 160986915 | Testis | *SLC22A3* | 3.89E-05 |
| rs113572208 | 6 | 161009494 | Liver | *LPA* | 6.98E-06 |
| rs113572208 | 6 | 161009494 | Cells_Cultured_fibroblasts | *LPAL2* | 1.55E-04 |
| rs550057 | 9 | 136146597 | Adipose_Subcutaneous | *SURF1* | 1.78E-05 |
| rs550057 | 9 | 136146597 | Adipose_Subcutaneous | *ABO* | 1.67E-12 |
| rs550057 | 9 | 136146597 | Adipose_Visceral_Omentum | *ABO* | 1.13E-23 |
| rs550057 | 9 | 136146597 | Adrenal_Gland | *ABO* | 4.27E-19 |
| rs550057 | 9 | 136146597 | Whole_Blood | *ABO* | 8.74E-51 |
| rs550057 | 9 | 136146597 | Artery_Coronary | *ABO* | 1.46E-07 |
| rs550057 | 9 | 136146597 | Artery_Tibial | *ABO* | 3.77E-14 |
| rs550057 | 9 | 136146597 | Breast_Mammary_Tissue | *ABO* | 2.66E-07 |
| rs550057 | 9 | 136146597 | Colon_Sigmoid | *ABO* | 2.69E-11 |
| rs550057 | 9 | 136146597 | Colon_Transverse | *ABO* | 3.37E-06 |
| rs550057 | 9 | 136146597 | Esophagus_Gastroesophageal_Junction | *ABO* | 2.78E-05 |
| rs550057 | 9 | 136146597 | Esophagus_Mucosa | *ABO* | 3.55E-17 |
| rs550057 | 9 | 136146597 | Esophagus_Muscularis | *ABO* | 6.45E-12 |
| rs550057 | 9 | 136146597 | Heart_Atrial_Appendage | *SURF1* | 2.19E-07 |
| rs550057 | 9 | 136146597 | Heart_Atrial_Appendage | *ABO* | 5.78E-11 |
| rs550057 | 9 | 136146597 | Heart_Left_Ventricle | *ABO* | 3.02E-17 |
| rs550057 | 9 | 136146597 | Liver | *ABO* | 2.74E-12 |
| rs550057 | 9 | 136146597 | Lung | *ABO* | 1.11E-07 |
| rs550057 | 9 | 136146597 | Muscle_Skeletal | *ABO* | 3.35E-21 |
| rs550057 | 9 | 136146597 | Nerve_Tibial | *ABO* | 5.26E-07 |
| rs550057 | 9 | 136146597 | Pancreas | *ABO* | 8.06E-09 |
| rs550057 | 9 | 136146597 | Pituitary | *ABO* | 4.55E-10 |
| rs550057 | 9 | 136146597 | Testis | *ABO* | 1.12E-08 |
| rs10766194 | 11 | 14864214 | Adipose_Subcutaneous | *RRAS2* | 1.41E-05 |
| rs10766194 | 11 | 14864214 | Whole_Blood | *COPB1* | 1.53E-09 |
| rs10766194 | 11 | 14864214 | Artery_Tibial | *RRAS2* | 7.09E-06 |
| rs10766194 | 11 | 14864214 | Brain_Cerebellum | *COPB1* | 6.50E-05 |
| rs10766194 | 11 | 14864214 | Esophagus_Mucosa | *RRAS2* | 7.81E-05 |
| rs10766194 | 11 | 14864214 | Lung | *RRAS2* | 4.19E-05 |
| rs10766194 | 11 | 14864214 | Nerve_Tibial | *RRAS2* | 2.12E-05 |
| rs10766194 | 11 | 14864214 | Pancreas | *PDE3B* | 2.86E-09 |
| rs10766194 | 11 | 14864214 | Cells_Cultured_fibroblasts | *COPB1* | 4.02E-05 |
| rs10766194 | 11 | 14864214 | Testis | *RRAS2* | 2.50E-06 |
| rs10766194 | 11 | 14864214 | Thyroid | *RRAS2* | 3.95E-05 |
| rs10766194 | 11 | 14864214 | Thyroid | *CYP2R1* | 2.26E-06 |
| rs116970203 | 11 | 14876718 | Muscle_Skeletal | *CYP2R1* | 1.38E-05 |
| rs964184 | 11 | 116648917 | Adipose_Subcutaneous | *ZNF259* | 6.85E-05 |
| rs964184 | 11 | 116648917 | Adipose_Subcutaneous | *RP11-109L13.1* | 3.20E-07 |
| rs964184 | 11 | 116648917 | Adipose_Visceral_Omentum | *RP11-109L13.1* | 5.50E-05 |
| rs964184 | 11 | 116648917 | Whole_Blood | *ZNF259* | 5.11E-05 |
| rs964184 | 11 | 116648917 | Artery_Aorta | *RP11-109L13.1* | 1.13E-05 |
| rs964184 | 11 | 116648917 | Brain_Hippocampus | *ZNF259* | 1.10E-05 |
| rs964184 | 11 | 116648917 | Colon_Sigmoid | *RP11-109L13.1* | 4.50E-05 |
| rs964184 | 11 | 116648917 | Colon_Transverse | *RP11-109L13.1* | 3.81E-05 |
| rs964184 | 11 | 116648917 | Esophagus_Muscularis | *RP11-109L13.1* | 2.41E-07 |
| rs964184 | 11 | 116648917 | Muscle_Skeletal | *RP11-109L13.1* | 5.92E-07 |
| rs964184 | 11 | 116648917 | Nerve_Tibial | *RP11-109L13.1* | 6.29E-07 |
| rs964184 | 11 | 116648917 | Cells_Cultured_fibroblasts | *ZNF259* | 7.91E-06 |
| rs964184 | 11 | 116648917 | Cells_Cultured_fibroblasts | *PAFAH1B2* | 1.39E-04 |
| rs964184 | 11 | 116648917 | Skin_Sun_Exposed_Lower_leg | *RP11-109L13.1* | 1.45E-04 |
| rs964184 | 11 | 116648917 | Testis | *RP11-109L13.1* | 2.41E-06 |
| rs2244608 | 12 | 121416988 | Adipose_Subcutaneous | *SPPL3* | 1.23E-05 |
| rs2244608 | 12 | 121416988 | Adipose_Subcutaneous | *C12orf43* | 5.12E-14 |
| rs2244608 | 12 | 121416988 | Adipose_Subcutaneous | *UNC119B* | 1.40E-04 |
| rs2244608 | 12 | 121416988 | Adipose_Visceral_Omentum | *C12orf43* | 1.16E-08 |
| rs2244608 | 12 | 121416988 | Cells_EBV-transformed_lymphocytes | *C12orf43* | 1.97E-05 |
| rs2244608 | 12 | 121416988 | Whole_Blood | *C12orf43* | 3.87E-05 |
| rs2244608 | 12 | 121416988 | Artery_Aorta | *C12orf43* | 6.80E-07 |
| rs2244608 | 12 | 121416988 | Artery_Tibial | *C12orf43* | 2.77E-14 |
| rs2244608 | 12 | 121416988 | Brain_Cerebellum | *SPPL3* | 9.28E-05 |
| rs2244608 | 12 | 121416988 | Brain_Cortex | *SPPL3* | 5.74E-07 |
| rs2244608 | 12 | 121416988 | Brain_Nucleus_accumbens_basal_ganglia | *SPPL3* | 8.85E-07 |
| rs2244608 | 12 | 121416988 | Breast_Mammary_Tissue | *C12orf43* | 2.96E-05 |
| rs2244608 | 12 | 121416988 | Colon_Sigmoid | *C12orf43* | 5.02E-06 |
| rs2244608 | 12 | 121416988 | Colon_Transverse | *C12orf43* | 3.08E-08 |
| rs2244608 | 12 | 121416988 | Esophagus_Gastroesophageal_Junction | *C12orf43* | 6.99E-06 |
| rs2244608 | 12 | 121416988 | Esophagus_Mucosa | *C12orf43* | 3.66E-06 |
| rs2244608 | 12 | 121416988 | Esophagus_Muscularis | *SPPL3* | 4.38E-06 |
| rs2244608 | 12 | 121416988 | Esophagus_Muscularis | *C12orf43* | 1.47E-11 |
| rs2244608 | 12 | 121416988 | Esophagus_Muscularis | *UNC119B* | 9.45E-05 |
| rs2244608 | 12 | 121416988 | Heart_Atrial_Appendage | *C12orf43* | 2.42E-14 |
| rs2244608 | 12 | 121416988 | Lung | *SPPL3* | 9.28E-05 |
| rs2244608 | 12 | 121416988 | Lung | *C12orf43* | 1.13E-08 |
| rs2244608 | 12 | 121416988 | Muscle_Skeletal | *C12orf43* | 1.94E-10 |
| rs2244608 | 12 | 121416988 | Nerve_Tibial | *SPPL3* | 2.48E-07 |
| rs2244608 | 12 | 121416988 | Nerve_Tibial | *C12orf43* | 4.57E-08 |
| rs2244608 | 12 | 121416988 | Pancreas | *SPPL3* | 4.82E-05 |
| rs2244608 | 12 | 121416988 | Pituitary | *C12orf43* | 1.83E-06 |
| rs2244608 | 12 | 121416988 | Prostate | *C12orf43* | 5.62E-05 |
| rs2244608 | 12 | 121416988 | Cells_Cultured_fibroblasts | *SPPL3* | 7.93E-08 |
| rs2244608 | 12 | 121416988 | Cells_Cultured_fibroblasts | *C12orf43* | 1.23E-08 |
| rs2244608 | 12 | 121416988 | Skin_Not_Sun_Exposed_Suprapubic | *C12orf43* | 5.43E-08 |
| rs2244608 | 12 | 121416988 | Skin_Sun_Exposed_Lower_leg | *MLEC* | 8.71E-10 |
| rs2244608 | 12 | 121416988 | Skin_Sun_Exposed_Lower_leg | *C12orf43* | 5.31E-05 |
| rs2244608 | 12 | 121416988 | Testis | *C12orf43* | 1.09E-04 |
| rs2244608 | 12 | 121416988 | Thyroid | *ACADS* | 1.91E-08 |
| rs28929474 | 14 | 94844947 | Artery_Tibial | *IFI27L2* | 1.01E-05 |
| rs28929474 | 14 | 94844947 | Heart_Left_Ventricle | *IFI27L2* | 6.04E-06 |
| rs3174744 | 17 | 7322245 | Adipose_Subcutaneous | *CHRNB1* | 1.77E-11 |
| rs3174744 | 17 | 7322245 | Adipose_Visceral_Omentum | *CHRNB1* | 3.46E-05 |
| rs3174744 | 17 | 7322245 | Artery_Aorta | *CHRNB1* | 2.78E-05 |
| rs3174744 | 17 | 7322245 | Artery_Tibial | *CHRNB1* | 3.54E-11 |
| rs3174744 | 17 | 7322245 | Colon_Sigmoid | *CHRNB1* | 4.11E-09 |
| rs3174744 | 17 | 7322245 | Esophagus_Gastroesophageal_Junction | *CHRNB1* | 2.63E-05 |
| rs3174744 | 17 | 7322245 | Esophagus_Muscularis | *CHRNB1* | 7.67E-08 |
| rs3174744 | 17 | 7322245 | Lung | *CHRNB1* | 1.82E-12 |
| rs3174744 | 17 | 7322245 | Muscle_Skeletal | *CHRNB1* | 4.07E-31 |
| rs3174744 | 17 | 7322245 | Nerve_Tibial | *CHRNB1* | 1.15E-07 |
| rs3174744 | 17 | 7322245 | Cells_Cultured_fibroblasts | *CHRNB1* | 1.65E-08 |
| rs3174744 | 17 | 7322245 | Cells_Cultured_fibroblasts | *TNFSF12* | 9.97E-10 |
| rs9892862 | 17 | 7439014 | Adipose_Subcutaneous | *ATP1B2* | 7.62E-05 |
| rs9892862 | 17 | 7439014 | Adipose_Subcutaneous | *CHRNB1* | 1.71E-08 |
| rs9892862 | 17 | 7439014 | Whole_Blood | *TNFSF12* | 1.16E-05 |
| rs9892862 | 17 | 7439014 | Artery_Tibial | *CHRNB1* | 9.53E-05 |
| rs9892862 | 17 | 7439014 | Artery_Tibial | *ZBTB4* | 7.45E-08 |
| rs9892862 | 17 | 7439014 | Brain_Amygdala | *TNFSF13* | 1.03E-05 |
| rs9892862 | 17 | 7439014 | Brain_Cerebellar_Hemisphere | *TNFSF12* | 2.09E-08 |
| rs9892862 | 17 | 7439014 | Esophagus_Mucosa | *ATP1B2* | 9.38E-07 |
| rs9892862 | 17 | 7439014 | Esophagus_Mucosa | *EIF4A1* | 1.47E-05 |
| rs9892862 | 17 | 7439014 | Esophagus_Muscularis | *CHRNB1* | 2.73E-06 |
| rs9892862 | 17 | 7439014 | Heart_Atrial_Appendage | *SAT2* | 3.43E-05 |
| rs9892862 | 17 | 7439014 | Muscle_Skeletal | *SAT2* | 1.10E-04 |
| rs9892862 | 17 | 7439014 | Muscle_Skeletal | *CHRNB1* | 7.61E-18 |
| rs9892862 | 17 | 7439014 | Nerve_Tibial | *CHRNB1* | 2.30E-06 |
| rs9892862 | 17 | 7439014 | Cells_Cultured_fibroblasts | *CHRNB1* | 9.14E-06 |
| rs9892862 | 17 | 7439014 | Cells_Cultured_fibroblasts | *TNFSF12* | 3.02E-14 |
| rs9892862 | 17 | 7439014 | Skin_Sun_Exposed_Lower_leg | *ATP1B2* | 3.20E-08 |
| rs9892862 | 17 | 7439014 | Skin_Sun_Exposed_Lower_leg | *FGF11* | 1.30E-04 |
| rs9892862 | 17 | 7439014 | Skin_Sun_Exposed_Lower_leg | *POLR2A* | 6.15E-05 |
| rs9892862 | 17 | 7439014 | Testis | *ZBTB4* | 1.26E-08 |
| rs113924794 | 17 | 7457864 | Adipose_Subcutaneous | *MPDU1* | 2.72E-05 |
| rs113924794 | 17 | 7457864 | Adipose_Subcutaneous | *TNFSF13* | 7.87E-05 |
| rs113924794 | 17 | 7457864 | Adipose_Subcutaneous | *SENP3* | 9.60E-05 |
| rs113924794 | 17 | 7457864 | Adipose_Subcutaneous | *CHRNB1* | 6.33E-09 |
| rs113924794 | 17 | 7457864 | Adipose_Subcutaneous | *TNFSF12* | 1.29E-17 |
| rs113924794 | 17 | 7457864 | Adipose_Visceral_Omentum | *CHRNB1* | 4.00E-09 |
| rs113924794 | 17 | 7457864 | Adipose_Visceral_Omentum | *AC113189.5* | 1.61E-10 |
| rs113924794 | 17 | 7457864 | Whole_Blood | *TNFSF13* | 1.95E-09 |
| rs113924794 | 17 | 7457864 | Whole_Blood | *TNFSF12* | 3.71E-08 |
| rs113924794 | 17 | 7457864 | Artery_Aorta | *TNFSF12* | 1.36E-12 |
| rs113924794 | 17 | 7457864 | Artery_Tibial | *SOX15* | 2.01E-06 |
| rs113924794 | 17 | 7457864 | Artery_Tibial | *MPDU1* | 2.79E-06 |
| rs113924794 | 17 | 7457864 | Artery_Tibial | *SENP3* | 7.76E-05 |
| rs113924794 | 17 | 7457864 | Artery_Tibial | *CHRNB1* | 2.90E-05 |
| rs113924794 | 17 | 7457864 | Artery_Tibial | *TNFSF12* | 9.89E-25 |
| rs113924794 | 17 | 7457864 | Brain_Caudate_basal_ganglia | *CHRNB1* | 1.83E-05 |
| rs113924794 | 17 | 7457864 | Brain_Caudate_basal_ganglia | *AC113189.5* | 7.65E-07 |
| rs113924794 | 17 | 7457864 | Brain_Cerebellum | *SAT2* | 1.67E-05 |
| rs113924794 | 17 | 7457864 | Brain_Cortex | *SHBG* | 2.08E-07 |
| rs113924794 | 17 | 7457864 | Colon_Sigmoid | *SENP3* | 1.12E-05 |
| rs113924794 | 17 | 7457864 | Colon_Sigmoid | *TNFSF12* | 1.82E-05 |
| rs113924794 | 17 | 7457864 | Esophagus_Gastroesophageal_Junction | *TNFSF12* | 1.53E-10 |
| rs113924794 | 17 | 7457864 | Esophagus_Mucosa | *CD68* | 2.17E-05 |
| rs113924794 | 17 | 7457864 | Esophagus_Mucosa | *MPDU1* | 1.28E-05 |
| rs113924794 | 17 | 7457864 | Esophagus_Mucosa | *SENP3* | 1.05E-06 |
| rs113924794 | 17 | 7457864 | Esophagus_Mucosa | *CHRNB1* | 7.64E-06 |
| rs113924794 | 17 | 7457864 | Esophagus_Mucosa | *ZBTB4* | 1.38E-05 |
| rs113924794 | 17 | 7457864 | Esophagus_Muscularis | *CHRNB1* | 1.43E-05 |
| rs113924794 | 17 | 7457864 | Esophagus_Muscularis | *ZBTB4* | 2.44E-05 |
| rs113924794 | 17 | 7457864 | Esophagus_Muscularis | *AC113189.5* | 1.84E-05 |
| rs113924794 | 17 | 7457864 | Esophagus_Muscularis | *TNFSF12* | 1.11E-12 |
| rs113924794 | 17 | 7457864 | Heart_Atrial_Appendage | *AC113189.5* | 3.94E-05 |
| rs113924794 | 17 | 7457864 | Muscle_Skeletal | *TNFSF13* | 2.75E-05 |
| rs113924794 | 17 | 7457864 | Muscle_Skeletal | *FGF11* | 2.08E-06 |
| rs113924794 | 17 | 7457864 | Muscle_Skeletal | *TMEM102* | 3.11E-06 |
| rs113924794 | 17 | 7457864 | Nerve_Tibial | *CHRNB1* | 6.56E-05 |
| rs113924794 | 17 | 7457864 | Nerve_Tibial | *AC113189.5* | 1.87E-05 |
| rs113924794 | 17 | 7457864 | Nerve_Tibial | *TNFSF12* | 7.63E-05 |
| rs113924794 | 17 | 7457864 | Pituitary | *CHRNB1* | 1.36E-05 |
| rs113924794 | 17 | 7457864 | Cells_Cultured_fibroblasts | *TNFSF13* | 3.25E-07 |
| rs113924794 | 17 | 7457864 | Cells_Cultured_fibroblasts | *SENP3* | 1.62E-05 |
| rs113924794 | 17 | 7457864 | Cells_Cultured_fibroblasts | *CHRNB1* | 7.41E-12 |
| rs113924794 | 17 | 7457864 | Cells_Cultured_fibroblasts | *SLC35G6* | 2.39E-05 |
| rs113924794 | 17 | 7457864 | Skin_Not_Sun_Exposed_Suprapubic | *SENP3* | 5.50E-07 |
| rs113924794 | 17 | 7457864 | Skin_Not_Sun_Exposed_Suprapubic | *CHRNB1* | 1.54E-05 |
| rs113924794 | 17 | 7457864 | Skin_Sun_Exposed_Lower_leg | *MPDU1* | 5.13E-06 |
| rs113924794 | 17 | 7457864 | Skin_Sun_Exposed_Lower_leg | *SENP3* | 7.72E-07 |
| rs113924794 | 17 | 7457864 | Skin_Sun_Exposed_Lower_leg | *CHRNB1* | 6.56E-07 |
| rs113924794 | 17 | 7457864 | Testis | *SENP3* | 1.69E-10 |
| rs113924794 | 17 | 7457864 | Thyroid | *SENP3* | 2.40E-05 |
| rs113924794 | 17 | 7457864 | Thyroid | *FGF11* | 4.46E-05 |
| rs113924794 | 17 | 7457864 | Thyroid | *CHRNB1* | 4.71E-07 |
| rs12944954 | 17 | 7485131 | Adipose_Subcutaneous | *CHRNB1* | 7.74E-07 |
| rs12944954 | 17 | 7485131 | Artery_Tibial | *SNORA48* | 3.15E-05 |
| rs12944954 | 17 | 7485131 | Lung | *SNORA48* | 8.77E-07 |
| rs12944954 | 17 | 7485131 | Muscle_Skeletal | *CHRNB1* | 1.27E-05 |
| rs858519 | 17 | 7531965 | Whole_Blood | *FXR2* | 1.41E-05 |
| rs858519 | 17 | 7531965 | Whole_Blood | *CHRNB1* | 3.49E-05 |
| rs858519 | 17 | 7531965 | Whole_Blood | *TNFSF12* | 1.21E-15 |
| rs858519 | 17 | 7531965 | Artery_Tibial | *ATP1B2* | 2.88E-07 |
| rs858519 | 17 | 7531965 | Brain_Caudate_basal_ganglia | *ATP1B2* | 2.15E-05 |
| rs858519 | 17 | 7531965 | Esophagus_Mucosa | *EIF4A1* | 5.18E-05 |
| rs858519 | 17 | 7531965 | Esophagus_Mucosa | *CHRNB1* | 3.02E-05 |
| rs858519 | 17 | 7531965 | Heart_Atrial_Appendage | *SAT2* | 4.17E-08 |
| rs858519 | 17 | 7531965 | Heart_Left_Ventricle | *SAT2* | 4.68E-05 |
| rs858519 | 17 | 7531965 | Muscle_Skeletal | *SAT2* | 4.85E-06 |
| rs858519 | 17 | 7531965 | Muscle_Skeletal | *FGF11* | 7.86E-06 |
| rs858519 | 17 | 7531965 | Muscle_Skeletal | *CHRNB1* | 1.69E-14 |
| rs858519 | 17 | 7531965 | Nerve_Tibial | *ATP1B2* | 2.68E-05 |
| rs858519 | 17 | 7531965 | Pancreas | *SAT2* | 3.10E-07 |
| rs858519 | 17 | 7531965 | Pituitary | *SHBG* | 4.40E-06 |
| rs858519 | 17 | 7531965 | Cells_Cultured_fibroblasts | *TNFSF13* | 4.77E-06 |
| rs858519 | 17 | 7531965 | Cells_Cultured_fibroblasts | *SENP3* | 7.44E-06 |
| rs858519 | 17 | 7531965 | Cells_Cultured_fibroblasts | *TNFSF12* | 1.54E-17 |
| rs858519 | 17 | 7531965 | Skin_Not_Sun_Exposed_Suprapubic | *SAT2* | 9.83E-05 |
| rs858519 | 17 | 7531965 | Skin_Not_Sun_Exposed_Suprapubic | *SENP3* | 5.00E-09 |
| rs858519 | 17 | 7531965 | Skin_Not_Sun_Exposed_Suprapubic | *CHRNB1* | 7.38E-05 |
| rs858519 | 17 | 7531965 | Skin_Sun_Exposed_Lower_leg | *ATP1B2* | 1.03E-04 |
| rs858519 | 17 | 7531965 | Skin_Sun_Exposed_Lower_leg | *SENP3* | 4.03E-08 |
| rs858519 | 17 | 7531965 | Skin_Sun_Exposed_Lower_leg | *CHRNB1* | 1.92E-07 |
| rs858519 | 17 | 7531965 | Spleen | *TNFSF12* | 9.88E-07 |
| rs858519 | 17 | 7531965 | Testis | *ATP1B2* | 8.39E-05 |
| rs858519 | 17 | 7531965 | Testis | *SENP3* | 3.69E-07 |
| rs858519 | 17 | 7531965 | Thyroid | *SHBG* | 8.76E-05 |
| rs62059839 | 17 | 7533015 | Adipose_Subcutaneous | *TNFSF13* | 1.66E-05 |
| rs62059839 | 17 | 7533015 | Adrenal_Gland | *SHBG* | 6.44E-08 |
| rs62059839 | 17 | 7533015 | Whole_Blood | *SAT2* | 8.65E-07 |
| rs62059839 | 17 | 7533015 | Whole_Blood | *TNFSF13* | 2.84E-05 |
| rs62059839 | 17 | 7533015 | Whole_Blood | *CHRNB1* | 8.94E-05 |
| rs62059839 | 17 | 7533015 | Whole_Blood | *TNFSF12* | 6.60E-25 |
| rs62059839 | 17 | 7533015 | Brain_Cerebellum | *SAT2* | 2.48E-05 |
| rs62059839 | 17 | 7533015 | Brain_Spinal_cord_cervical_c-1 | *TNFSF12* | 2.25E-07 |
| rs62059839 | 17 | 7533015 | Colon_Transverse | *SAT2* | 8.10E-07 |
| rs62059839 | 17 | 7533015 | Esophagus_Gastroesophageal_Junction | *SAT2* | 4.38E-07 |
| rs62059839 | 17 | 7533015 | Esophagus_Mucosa | *CD68* | 3.33E-07 |
| rs62059839 | 17 | 7533015 | Esophagus_Mucosa | *SAT2* | 1.03E-10 |
| rs62059839 | 17 | 7533015 | Esophagus_Mucosa | *CHRNB1* | 2.33E-06 |
| rs62059839 | 17 | 7533015 | Esophagus_Muscularis | *SAT2* | 8.00E-08 |
| rs62059839 | 17 | 7533015 | Heart_Atrial_Appendage | *SAT2* | 4.65E-09 |
| rs62059839 | 17 | 7533015 | Heart_Atrial_Appendage | *CHRNB1* | 1.18E-05 |
| rs62059839 | 17 | 7533015 | Heart_Left_Ventricle | *SAT2* | 1.02E-07 |
| rs62059839 | 17 | 7533015 | Muscle_Skeletal | *SAT2* | 1.91E-18 |
| rs62059839 | 17 | 7533015 | Muscle_Skeletal | *CHRNB1* | 3.71E-35 |
| rs62059839 | 17 | 7533015 | Nerve_Tibial | *SAT2* | 4.85E-08 |
| rs62059839 | 17 | 7533015 | Pancreas | *SAT2* | 1.13E-05 |
| rs62059839 | 17 | 7533015 | Pituitary | *SHBG* | 1.47E-06 |
| rs62059839 | 17 | 7533015 | Cells_Cultured_fibroblasts | *SAT2* | 8.36E-07 |
| rs62059839 | 17 | 7533015 | Cells_Cultured_fibroblasts | *TNFSF13* | 2.92E-18 |
| rs62059839 | 17 | 7533015 | Cells_Cultured_fibroblasts | *TNFSF12* | 2.62E-29 |
| rs62059839 | 17 | 7533015 | Skin_Not_Sun_Exposed_Suprapubic | *SAT2* | 3.30E-07 |
| rs62059839 | 17 | 7533015 | Skin_Sun_Exposed_Lower_leg | *SAT2* | 1.24E-04 |
| rs62059839 | 17 | 7533015 | Spleen | *TNFSF12* | 9.73E-08 |
| rs62059839 | 17 | 7533015 | Stomach | *SAT2* | 2.29E-07 |
| rs62059839 | 17 | 7533015 | Thyroid | *SAT2* | 2.58E-05 |
| rs1042522 | 17 | 7579472 | Adipose_Visceral_Omentum | *EFNB3* | 2.68E-06 |
| rs1042522 | 17 | 7579472 | Brain_Cerebellar_Hemisphere | *EFNB3* | 1.28E-05 |
| rs1042522 | 17 | 7579472 | Breast_Mammary_Tissue | *EFNB3* | 2.95E-05 |
| rs1042522 | 17 | 7579472 | Colon_Transverse | *EFNB3* | 3.36E-06 |
| rs1042522 | 17 | 7579472 | Esophagus_Muscularis | *EFNB3* | 6.38E-07 |
| rs1042522 | 17 | 7579472 | Pancreas | *EFNB3* | 8.20E-07 |
| rs1042522 | 17 | 7579472 | Cells_Cultured_fibroblasts | *EFNB3* | 7.27E-05 |
| rs1042522 | 17 | 7579472 | Testis | *LSMD1* | 1.92E-05 |
| rs1042522 | 17 | 7579472 | Thyroid | *EFNB3* | 6.22E-09 |
| rs55662831 | 17 | 7630193 | Whole_Blood | *SAT2* | 2.21E-05 |
| rs55662831 | 17 | 7630193 | Colon_Sigmoid | *SAT2* | 2.40E-06 |
| rs55662831 | 17 | 7630193 | Esophagus_Mucosa | *SAT2* | 9.11E-07 |
| rs55662831 | 17 | 7630193 | Muscle_Skeletal | *SAT2* | 6.10E-10 |
| rs55662831 | 17 | 7630193 | Nerve_Tibial | *SAT2* | 1.86E-06 |
| rs55662831 | 17 | 7630193 | Cells_Cultured_fibroblasts | *SAT2* | 4.39E-05 |
| rs55662831 | 17 | 7630193 | Cells_Cultured_fibroblasts | *CHRNB1* | 6.70E-05 |
| rs55662831 | 17 | 7630193 | Cells_Cultured_fibroblasts | *TNFSF12* | 5.35E-05 |
| rs55662831 | 17 | 7630193 | Skin_Sun_Exposed_Lower_leg | *SAT2* | 1.96E-05 |
| rs73015024 | 19 | 11197598 | Esophagus_Mucosa | *SMARCA4* | 1.33E-04 |
| rs73015024 | 19 | 11197598 | Muscle_Skeletal | *SLC44A2* | 6.19E-05 |
| rs73015024 | 19 | 11197598 | Esophagus_Mucosa | *SMARCA4* | 1.33E-04 |
| rs73015024 | 19 | 11197598 | Muscle_Skeletal | *SLC44A2* | 6.19E-05 |
| rs73015024 | 19 | 11197598 | Esophagus_Mucosa | *SMARCA4* | 1.33E-04 |
| rs73015024 | 19 | 11197598 | Muscle_Skeletal | *SLC44A2* | 6.19E-05 |
| rs58542926 | 19 | 19379549 | Adipose_Subcutaneous | *ATP13A1* | 3.75E-07 |
| rs58542926 | 19 | 19379549 | Adipose_Subcutaneous | *TM6SF2* | 7.09E-05 |
| rs58542926 | 19 | 19379549 | Adipose_Visceral_Omentum | *ATP13A1* | 7.27E-05 |
| rs58542926 | 19 | 19379549 | Whole_Blood | *MAU2* | 6.75E-14 |
| rs58542926 | 19 | 19379549 | Whole_Blood | *GATAD2A* | 3.74E-06 |
| rs58542926 | 19 | 19379549 | Artery_Aorta | *ATP13A1* | 2.07E-07 |
| rs58542926 | 19 | 19379549 | Artery_Tibial | *ATP13A1* | 2.83E-05 |
| rs58542926 | 19 | 19379549 | Breast_Mammary_Tissue | *MEF2BNB* | 4.48E-06 |
| rs58542926 | 19 | 19379549 | Colon_Sigmoid | *YJEFN3* | 7.71E-05 |
| rs58542926 | 19 | 19379549 | Esophagus_Gastroesophageal_Junction | *ATP13A1* | 4.60E-05 |
| rs58542926 | 19 | 19379549 | Esophagus_Muscularis | *ATP13A1* | 5.91E-05 |
| rs58542926 | 19 | 19379549 | Heart_Atrial_Appendage | *ATP13A1* | 2.56E-05 |
| rs58542926 | 19 | 19379549 | Heart_Left_Ventricle | *ATP13A1* | 4.89E-05 |
| rs58542926 | 19 | 19379549 | Heart_Left_Ventricle | *TM6SF2* | 3.19E-05 |
| rs58542926 | 19 | 19379549 | Lung | *ATP13A1* | 7.09E-06 |
| rs58542926 | 19 | 19379549 | Muscle_Skeletal | *MAU2* | 1.75E-10 |
| rs58542926 | 19 | 19379549 | Nerve_Tibial | *ATP13A1* | 4.99E-07 |
| rs58542926 | 19 | 19379549 | Nerve_Tibial | *TM6SF2* | 2.52E-05 |
| rs58542926 | 19 | 19379549 | Cells_Cultured_fibroblasts | *ATP13A1* | 3.89E-05 |
| rs58542926 | 19 | 19379549 | Cells_Cultured_fibroblasts | *GATAD2A* | 1.64E-06 |
| rs58542926 | 19 | 19379549 | Cells_Cultured_fibroblasts | *TM6SF2* | 2.70E-04 |
| rs58542926 | 19 | 19379549 | Skin_Sun_Exposed_Lower_leg | *ATP13A1* | 2.49E-04 |
| rs58542926 | 19 | 19379549 | Skin_Sun_Exposed_Lower_leg | *GATAD2A* | 1.06E-05 |
| rs58542926 | 19 | 19379549 | Skin_Sun_Exposed_Lower_leg | *TM6SF2* | 7.59E-05 |
| rs58542926 | 19 | 19379549 | Skin_Sun_Exposed_Lower_leg | *YJEFN3* | 1.85E-04 |
| rs58542926 | 19 | 19379549 | Thyroid | *GMIP* | 2.42E-04 |
| rs58542926 | 19 | 19379549 | Thyroid | *ATP13A1* | 5.12E-06 |
| rs58542926 | 19 | 19379549 | Adipose_Subcutaneous | *ATP13A1* | 3.75E-07 |
| rs58542926 | 19 | 19379549 | Adipose_Subcutaneous | *TM6SF2* | 7.09E-05 |
| rs58542926 | 19 | 19379549 | Adipose_Visceral_Omentum | *ATP13A1* | 7.27E-05 |
| rs58542926 | 19 | 19379549 | Whole_Blood | *MAU2* | 6.75E-14 |
| rs58542926 | 19 | 19379549 | Whole_Blood | *GATAD2A* | 3.74E-06 |
| rs58542926 | 19 | 19379549 | Artery_Aorta | *ATP13A1* | 2.07E-07 |
| rs58542926 | 19 | 19379549 | Artery_Tibial | *ATP13A1* | 2.83E-05 |
| rs58542926 | 19 | 19379549 | Breast_Mammary_Tissue | *MEF2BNB* | 4.48E-06 |
| rs58542926 | 19 | 19379549 | Colon_Sigmoid | *YJEFN3* | 7.71E-05 |
| rs58542926 | 19 | 19379549 | Esophagus_Gastroesophageal_Junction | *ATP13A1* | 4.60E-05 |
| rs58542926 | 19 | 19379549 | Esophagus_Muscularis | *ATP13A1* | 5.91E-05 |
| rs58542926 | 19 | 19379549 | Heart_Atrial_Appendage | *ATP13A1* | 2.56E-05 |
| rs58542926 | 19 | 19379549 | Heart_Left_Ventricle | *ATP13A1* | 4.89E-05 |
| rs58542926 | 19 | 19379549 | Heart_Left_Ventricle | *TM6SF2* | 3.19E-05 |
| rs58542926 | 19 | 19379549 | Lung | *ATP13A1* | 7.09E-06 |
| rs58542926 | 19 | 19379549 | Muscle_Skeletal | *MAU2* | 1.75E-10 |
| rs58542926 | 19 | 19379549 | Nerve_Tibial | *ATP13A1* | 4.99E-07 |
| rs58542926 | 19 | 19379549 | Nerve_Tibial | *TM6SF2* | 2.52E-05 |
| rs58542926 | 19 | 19379549 | Cells_Cultured_fibroblasts | *ATP13A1* | 3.89E-05 |
| rs58542926 | 19 | 19379549 | Cells_Cultured_fibroblasts | *GATAD2A* | 1.64E-06 |
| rs58542926 | 19 | 19379549 | Cells_Cultured_fibroblasts | *TM6SF2* | 2.70E-04 |
| rs58542926 | 19 | 19379549 | Skin_Sun_Exposed_Lower_leg | *ATP13A1* | 2.49E-04 |
| rs58542926 | 19 | 19379549 | Skin_Sun_Exposed_Lower_leg | *GATAD2A* | 1.06E-05 |
| rs58542926 | 19 | 19379549 | Skin_Sun_Exposed_Lower_leg | *TM6SF2* | 7.59E-05 |
| rs58542926 | 19 | 19379549 | Skin_Sun_Exposed_Lower_leg | *YJEFN3* | 1.85E-04 |
| rs58542926 | 19 | 19379549 | Thyroid | *GMIP* | 2.42E-04 |
| rs58542926 | 19 | 19379549 | Thyroid | *ATP13A1* | 5.12E-06 |
| rs8107974 | 19 | 19388500 | Adipose_Subcutaneous | *ATP13A1* | 2.62E-06 |
| rs8107974 | 19 | 19388500 | Adipose_Subcutaneous | *TM6SF2* | 1.24E-04 |
| rs8107974 | 19 | 19388500 | Adipose_Subcutaneous | *YJEFN3* | 1.60E-04 |
| rs8107974 | 19 | 19388500 | Adipose_Visceral_Omentum | *ATP13A1* | 4.96E-05 |
| rs8107974 | 19 | 19388500 | Adrenal_Gland | *ATP13A1* | 4.93E-05 |
| rs8107974 | 19 | 19388500 | Whole_Blood | *MAU2* | 3.89E-13 |
| rs8107974 | 19 | 19388500 | Whole_Blood | *GATAD2A* | 1.25E-05 |
| rs8107974 | 19 | 19388500 | Artery_Aorta | *ATP13A1* | 2.04E-07 |
| rs8107974 | 19 | 19388500 | Artery_Tibial | *ATP13A1* | 4.50E-05 |
| rs8107974 | 19 | 19388500 | Artery_Tibial | *ZNF682* | 9.32E-05 |
| rs8107974 | 19 | 19388500 | Breast_Mammary_Tissue | *MEF2BNB* | 1.11E-06 |
| rs8107974 | 19 | 19388500 | Colon_Transverse | *YJEFN3* | 3.91E-05 |
| rs8107974 | 19 | 19388500 | Heart_Atrial_Appendage | *ATP13A1* | 6.53E-05 |
| rs8107974 | 19 | 19388500 | Heart_Atrial_Appendage | *TM6SF2* | 1.10E-04 |
| rs8107974 | 19 | 19388500 | Heart_Left_Ventricle | *TM6SF2* | 2.98E-05 |
| rs8107974 | 19 | 19388500 | Lung | *ATP13A1* | 5.94E-05 |
| rs8107974 | 19 | 19388500 | Muscle_Skeletal | *MAU2* | 2.36E-10 |
| rs8107974 | 19 | 19388500 | Nerve_Tibial | *ATP13A1* | 3.36E-06 |
| rs8107974 | 19 | 19388500 | Nerve_Tibial | *TM6SF2* | 2.07E-04 |
| rs8107974 | 19 | 19388500 | Cells_Cultured_fibroblasts | *GATAD2A* | 1.99E-05 |
| rs8107974 | 19 | 19388500 | Skin_Not_Sun_Exposed_Suprapubic | *GATAD2A* | 1.35E-04 |
| rs8107974 | 19 | 19388500 | Skin_Sun_Exposed_Lower_leg | *GATAD2A* | 2.05E-05 |
| rs8107974 | 19 | 19388500 | Skin_Sun_Exposed_Lower_leg | *TM6SF2* | 3.94E-05 |
| rs8107974 | 19 | 19388500 | Skin_Sun_Exposed_Lower_leg | *YJEFN3* | 9.38E-06 |
| rs8107974 | 19 | 19388500 | Thyroid | *GMIP* | 2.71E-04 |
| rs8107974 | 19 | 19388500 | Thyroid | *ATP13A1* | 1.64E-05 |
| rs8107974 | 19 | 19388500 | Thyroid | *TM6SF2* | 1.80E-04 |
| rs8107974 | 19 | 19388500 | Adipose_Subcutaneous | *ATP13A1* | 2.62E-06 |
| rs8107974 | 19 | 19388500 | Adipose_Subcutaneous | *TM6SF2* | 1.24E-04 |
| rs8107974 | 19 | 19388500 | Adipose_Subcutaneous | *YJEFN3* | 1.60E-04 |
| rs8107974 | 19 | 19388500 | Adipose_Visceral_Omentum | *ATP13A1* | 4.96E-05 |
| rs8107974 | 19 | 19388500 | Adrenal_Gland | *ATP13A1* | 4.93E-05 |
| rs8107974 | 19 | 19388500 | Whole_Blood | *MAU2* | 3.89E-13 |
| rs8107974 | 19 | 19388500 | Whole_Blood | *GATAD2A* | 1.25E-05 |
| rs8107974 | 19 | 19388500 | Artery_Aorta | *ATP13A1* | 2.04E-07 |
| rs8107974 | 19 | 19388500 | Artery_Tibial | *ATP13A1* | 4.50E-05 |
| rs8107974 | 19 | 19388500 | Artery_Tibial | *ZNF682* | 9.32E-05 |
| rs8107974 | 19 | 19388500 | Breast_Mammary_Tissue | *MEF2BNB* | 1.11E-06 |
| rs8107974 | 19 | 19388500 | Colon_Transverse | *YJEFN3* | 3.91E-05 |
| rs8107974 | 19 | 19388500 | Heart_Atrial_Appendage | *ATP13A1* | 6.53E-05 |
| rs8107974 | 19 | 19388500 | Heart_Atrial_Appendage | *TM6SF2* | 1.10E-04 |
| rs8107974 | 19 | 19388500 | Heart_Left_Ventricle | *TM6SF2* | 2.98E-05 |
| rs8107974 | 19 | 19388500 | Lung | *ATP13A1* | 5.94E-05 |
| rs8107974 | 19 | 19388500 | Muscle_Skeletal | *MAU2* | 2.36E-10 |
| rs8107974 | 19 | 19388500 | Nerve_Tibial | *ATP13A1* | 3.36E-06 |
| rs8107974 | 19 | 19388500 | Nerve_Tibial | *TM6SF2* | 2.07E-04 |
| rs8107974 | 19 | 19388500 | Cells_Cultured_fibroblasts | *GATAD2A* | 1.99E-05 |
| rs8107974 | 19 | 19388500 | Skin_Not_Sun_Exposed_Suprapubic | *GATAD2A* | 1.35E-04 |
| rs8107974 | 19 | 19388500 | Skin_Sun_Exposed_Lower_leg | *GATAD2A* | 2.05E-05 |
| rs8107974 | 19 | 19388500 | Skin_Sun_Exposed_Lower_leg | *TM6SF2* | 3.94E-05 |
| rs8107974 | 19 | 19388500 | Skin_Sun_Exposed_Lower_leg | *YJEFN3* | 9.38E-06 |
| rs8107974 | 19 | 19388500 | Thyroid | *GMIP* | 2.71E-04 |
| rs8107974 | 19 | 19388500 | Thyroid | *ATP13A1* | 1.64E-05 |
| rs8107974 | 19 | 19388500 | Thyroid | *TM6SF2* | 1.80E-04 |
| rs769449 | 19 | 45410002 | Adipose_Subcutaneous | *CTB-171A8.1* | 3.34E-05 |
| rs769449 | 19 | 45410002 | Esophagus_Mucosa | *APOC1* | 6.21E-05 |
| rs769449 | 19 | 45410002 | Esophagus_Muscularis | *CTB-129P6.4* | 9.96E-05 |
| rs769449 | 19 | 45410002 | Thyroid | *CTB-171A8.1* | 3.36E-05 |
| rs429358 | 19 | 45411941 | Adrenal_Gland | *APOC1* | 4.75E-05 |
| rs429358 | 19 | 45411941 | Esophagus_Mucosa | *APOC1* | 2.32E-05 |
| rs429358 | 19 | 45411941 | Esophagus_Muscularis | *CTB-129P6.4* | 4.14E-05 |
| rs429358 | 19 | 45411941 | Thyroid | *CTB-171A8.1* | 1.21E-04 |
| rs429358 | 19 | 45411941 | Adrenal_Gland | *APOC1* | 4.75E-05 |
| rs429358 | 19 | 45411941 | Esophagus_Mucosa | *APOC1* | 2.32E-05 |
| rs429358 | 19 | 45411941 | Esophagus_Muscularis | *CTB-129P6.4* | 4.14E-05 |
| rs429358 | 19 | 45411941 | Thyroid | *CTB-171A8.1* | 1.21E-04 |
| rs429358 | 19 | 45411941 | Adrenal_Gland | *APOC1* | 4.75E-05 |
| rs429358 | 19 | 45411941 | Esophagus_Mucosa | *APOC1* | 2.32E-05 |
| rs429358 | 19 | 45411941 | Esophagus_Muscularis | *CTB-129P6.4* | 4.14E-05 |
| rs429358 | 19 | 45411941 | Thyroid | *CTB-171A8.1* | 1.21E-04 |
| rs429358 | 19 | 45411941 | Adrenal_Gland | *APOC1* | 4.75E-05 |
| rs429358 | 19 | 45411941 | Esophagus_Mucosa | *APOC1* | 2.32E-05 |
| rs429358 | 19 | 45411941 | Esophagus_Muscularis | *CTB-129P6.4* | 4.14E-05 |
| rs429358 | 19 | 45411941 | Thyroid | *CTB-171A8.1* | 1.21E-04 |
| rs7412 | 19 | 45412079 | Skin_Not_Sun_Exposed_Suprapubic | *APOE* | 1.17E-07 |
| rs7412 | 19 | 45412079 | Skin_Not_Sun_Exposed_Suprapubic | *APOE* | 1.17E-07 |
| rs7412 | 19 | 45412079 | Skin_Not_Sun_Exposed_Suprapubic | *APOE* | 1.17E-07 |
| rs2003757 | 22 | 24995663 | Cells_EBV-transformed_lymphocytes | *GGT1* | 1.60E-05 |
| rs2003757 | 22 | 24995663 | Whole_Blood | *GGT1* | 3.18E-08 |
| rs2003757 | 22 | 24995663 | Brain_Cerebellar_Hemisphere | *GGT1* | 1.05E-05 |
| rs2003757 | 22 | 24995663 | Colon_Transverse | *GGT1* | 6.08E-29 |
| rs2003757 | 22 | 24995663 | Colon_Transverse | *FAM211B* | 1.32E-05 |
| rs2003757 | 22 | 24995663 | Esophagus_Mucosa | *GGT1* | 4.71E-27 |
| rs2003757 | 22 | 24995663 | Liver | *GGT1* | 1.14E-05 |
| rs2003757 | 22 | 24995663 | Nerve_Tibial | *GGT1* | 2.25E-05 |
| rs2003757 | 22 | 24995663 | Nerve_Tibial | *FAM211B* | 9.79E-05 |
| rs2003757 | 22 | 24995663 | Pancreas | *GGT1* | 4.27E-43 |
| rs2003757 | 22 | 24995663 | Small_Intestine_Terminal_Ileum | *GGT1* | 1.79E-12 |
| rs2003757 | 22 | 24995663 | Spleen | *GGT1* | 1.84E-06 |
| rs2003757 | 22 | 24995663 | Stomach | *GGT1* | 7.80E-35 |
| rs2003757 | 22 | 24995663 | Stomach | *FAM211B* | 6.88E-06 |
| rs2003757 | 22 | 24995663 | Testis | *GGT1* | 5.81E-25 |
| rs2003757 | 22 | 24995663 | Testis | *POM121L10P* | 5.35E-06 |
| rs2003757 | 22 | 24995663 | Thyroid | *GGT1* | 6.36E-67 |
| rs3747207 | 22 | 44324855 | Adipose_Subcutaneous | *SAMM50* | 7.37E-09 |
| rs3747207 | 22 | 44324855 | Adipose_Visceral_Omentum | *SAMM50* | 2.58E-05 |
| rs3747207 | 22 | 44324855 | Breast_Mammary_Tissue | *SAMM50* | 2.71E-06 |
| rs3747207 | 22 | 44324855 | Pituitary | *SAMM50* | 2.13E-06 |
| rs3747207 | 22 | 44324855 | Skin_Not_Sun_Exposed_Suprapubic | *PNPLA3* | 1.28E-07 |
| rs3747207 | 22 | 44324855 | Skin_Sun_Exposed_Lower_leg | *PNPLA3* | 2.49E-06 |
| rs3747207 | 22 | 44324855 | Adipose_Subcutaneous | *SAMM50* | 7.37E-09 |
| rs3747207 | 22 | 44324855 | Adipose_Visceral_Omentum | *SAMM50* | 2.58E-05 |
| rs3747207 | 22 | 44324855 | Breast_Mammary_Tissue | *SAMM50* | 2.71E-06 |
| rs3747207 | 22 | 44324855 | Pituitary | *SAMM50* | 2.13E-06 |
| rs3747207 | 22 | 44324855 | Skin_Not_Sun_Exposed_Suprapubic | *PNPLA3* | 1.28E-07 |
| rs3747207 | 22 | 44324855 | Skin_Sun_Exposed_Lower_leg | *PNPLA3* | 2.49E-06 |

Results are obtained from GTEx V8 and include SNP ID (1st column), chromosome (2nd column), SNP base position (3rd column), analyzed tissue (4th column), tested gene (5th column), and *p*-value (6th column).

References

Davies, R.B. Algorithm AS 155: The Distribution of a Linear Combination of χ2 Random Variables. *Journal of the Royal Statistical Society. Series C (Applied Statistics)* 1980;29(3):323-333.

Gogarten, S.M.*, et al.* Genetic association testing using the GENESIS R/Bioconductor package. *Bioinformatics* 2019;35(24):5346-5348.

Jensen, J.*, et al.* Residual maximum likelihood estimation of (co) variance components in multivariate mixed linear models using average information. *Journal of the Indian Society of Agricultural Statistics* 1997;49:215-236.

Jiang, L.*, et al.* A resource-efficient tool for mixed model association analysis of large-scale data. *Nat Genet* 2019;51(12):1749-1755.

Kang, H.M.*, et al.* Variance component model to account for sample structure in genome-wide association studies. *Nat Genet* 2010;42(4):348-354.

Li, X.*, et al.* Powerful, scalable and resource-efficient meta-analysis of rare variant associations in large whole genome sequencing studies. *Nat Genet* 2023;55(1):154-164.

Liu, H., Tang, Y.Q. and Zhang, H.H. A new chi-square approximation to the distribution of non-negative definite quadratic forms in non-central normal variables. *Comput Stat Data An* 2009;53(4):853-856.

Moore, R.*, et al.* A linear mixed-model approach to study multivariate gene-environment interactions. *Nat Genet* 2019;51(1):180-186.

Ning, C.*, et al.* Efficient multivariate analysis algorithms for longitudinal genome-wide association studies. *Bioinformatics* 2019;35(23):4879-4885.

Svishcheva, G.R.*, et al.* Rapid variance components-based method for whole-genome association analysis. *Nat Genet* 2012;44(10):1166-1170.

Wu, B., Guan, W. and Pankow, J.S. On Efficient and Accurate Calculation of Significance P-Values for Sequence Kernel Association Testing of Variant Set. 2016(1469-1809 (Electronic)).

Zhou, X. and Stephens, M. Genome-wide efficient mixed-model analysis for association studies. *Nat Genet* 2012;44(7):821-824.
